# Supplementary material
Source: MDPI journal article supplement (https://www.mdpi.com/2073-4352/2/3/1357)
Supplement: s1 [file s1]

data_global

_audit_update_record
;
2010-09-14 # Formatted by publCIF
;

#===========================================================================
# 1. SUBMISSION DETAILS
#===========================================================================

# Name and address of author for correspondence

_publ_contact_author_name        'Sylvain Bernes'
_publ_contact_author_address     
;     
Universidad Aut\'onoma de Nuevo Le\'on
Facultad de Ciencias Qu\'imicas
Av. Universidad S/N
Ciudad Universitaria
San Nicol\'as de los Garza
Nuevo Le\'on 66451
Mexico
;

_publ_contact_author_phone       ?
_publ_contact_author_fax         ?
_publ_contact_author_email       sylvain_bernes@hotmail.com
_publ_contact_author_id_iucr     9661
_publ_requested_journal          Crystals
_publ_requested_category         ?

_publ_requested_coeditor_name    ?

_publ_contact_letter             ?     

#============================================================================
# 2. PROCESSING SUMMARY (IUCr Office Use Only)
#===========================================================================

_journal_date_recd_electronic      2008-05-14

_journal_date_to_coeditor        ?
_journal_date_from_coeditor      ?
_journal_date_accepted     ?

_journal_date_printers_first     ?
_journal_date_printers_final     ?
_journal_date_proofs_out         ?
_journal_date_proofs_in          ?

_journal_coeditor_name           ?
_journal_coeditor_code           ?
_journal_paper_category          ?
_journal_coeditor_notes          ?

_journal_techeditor_code         ?
_iucr_compatibility_tag          ACTA95
_journal_techeditor_notes        ?

_journal_coden_ASTM              ?
_journal_name_full               ?
_journal_year                    ?
_journal_volume                  ?
_journal_issue                   ?
_journal_page_first              ?
_journal_page_last               ?

_journal_suppl_publ_number       ?
_journal_suppl_publ_pages        ?

#============================================================================   
# 3. TITLE AND AUTHOR LIST
#===========================================================================

_publ_section_title   ?

_publ_section_title_footnote .

loop_
_publ_author_name
_publ_author_footnote
_publ_author_email
_publ_author_address

"Olgu\'in, Juan" . juan.olguintalavera@ucd.ie
;
University College Dublin
School of Chemistry and Chemical Biology
Belfield
Dublin, 4
Ireland
;

"Bern\`es, Sylvain" . sylvain_bernes@Hotmail.com
;
Universidad Aut\'onoma de Nuevo Le\'on, UANL
Facultad de Ciencias Qu\'imicas
Av. Universidad S/N
Ciudad Universitaria
San Nicol\'as de los Garza
Nuevo Le\'on CP 66451
Mexico
;

"Gasque, Laura" . gasquel@unam.mx
;
Universidad Nacional Aut\'onoma de M\'exico, UNAM
Facultad de Qu\'imica
Ciudad Universitaria
M\'exico D.F., CP 04510
Mexico
;

#============================================================================
# 4. TEXT
#===========================================================================

_publ_section_synopsis .
_publ_section_abstract  .
_publ_section_related_literature  .
_publ_section_comment  .
_publ_section_exptl_prep  .
_exptl_special_details  ?
_publ_section_exptl_refinement   .

_publ_section_references
;
Macrae, C. F., Edgington, P. R., McCabe, P., Pidcock, E., Shields, G. P.,
Taylor, R., Towler, M. & van de Streek, J. (2006). <i>J. Appl. Cryst.</i>
<b>39</b>, 453--457.

Sheldrick, G. M. (2008). <i>Acta Cryst.</i> A<b>64</b>, 112--122.

Siemens (1996). <i>XSCANS</i> (Version 2.21). Siemens Analytical X-ray
Instruments Inc., Madison, Wisconsin, USA.
;

_publ_section_figure_captions  ?
_publ_section_table_legends   ?     
_publ_section_acknowledgements  ?

#===========================================================================
# 5. STRUCTURE [Cu2(H2O)4(dimeim)].(BF4)4 (1)
#===========================================================================

data_1

# clave original: CuDBO (ICUAP, 2003)
# clave original: 
# clave Tesis: 

_database_code_CAS                ?
_database_code_CSD                ?

_audit_creation_method            SHELXL97 
_audit_creation_date              2011-08-26

loop_
 _audit_contact_author_name       
 _audit_contact_author_address
 _audit_contact_author_email
 _audit_contact_author_fax
 _audit_contact_author_phone

'Bern\`es, Sylvain'
;
Universidad Aut\'onoma de Nuevo Le\'on, UANL
Facultad de Ciencias Qu\'imicas
Av. Universidad S/N
Ciudad Universitaria
San Nicol\'as de los Garza
Nuevo Le\'on CP 66451
Mexico
;     
sylvain_bernes@Hotmail.com . .

_chemical_name_systematic
;
[\m-2,2'-(2,8-Dimethyl-4,7,10,12-tetrahydrodi-imidazo[4,5-<i>c</i>:4',5'-
<i>h</i>][1,6]diazecine-5,11(1<i>H</i>,6<i>H</i>)-diyl)bis(<i>N</i>,<i>N</i>-
dimethylethanamine)]-tetra-aqua-di-copper(ii) tetrakis(tetrafluoridoborate)
;
_chemical_name_common             ? 
_chemical_melting_point           ? 
_chemical_formula_moiety          'C20 H44 Cu2 N8 O4, 4(B F4)'
_chemical_formula_sum             'C20 H44 B4 Cu2 F16 N8 O4' 
_chemical_formula_weight          934.95 

_chemical_compound_source         methanol

_chemical_absolute_configuration  .

_chemical_optical_rotation        ?

_chemical_properties_physical     ?
_chemical_properties_biological   ?

loop_ 
 _atom_type_symbol 
 _atom_type_description 
 _atom_type_scat_dispersion_real 
 _atom_type_scat_dispersion_imag 
 _atom_type_scat_source 
 'C'  'C'   0.0033   0.0016 
 'International Tables Vol C Tables 4.2.6.8 and 6.1.1.4' 
 'H'  'H'   0.0000   0.0000 
 'International Tables Vol C Tables 4.2.6.8 and 6.1.1.4' 
 'B'  'B'   0.0013   0.0007 
 'International Tables Vol C Tables 4.2.6.8 and 6.1.1.4' 
 'N'  'N'   0.0061   0.0033 
 'International Tables Vol C Tables 4.2.6.8 and 6.1.1.4' 
 'O'  'O'   0.0106   0.0060 
 'International Tables Vol C Tables 4.2.6.8 and 6.1.1.4' 
 'F'  'F'   0.0171   0.0103 
 'International Tables Vol C Tables 4.2.6.8 and 6.1.1.4' 
 'Cu'  'Cu'   0.3201   1.2651 
 'International Tables Vol C Tables 4.2.6.8 and 6.1.1.4' 
  
_symmetry_cell_setting            triclinic 
_symmetry_space_group_name_H-M    'P -1'
_symmetry_space_group_name_Hall   '-P 1'
_symmetry_Int_Tables_number       2
  
loop_ 
 _symmetry_equiv_pos_as_xyz 
 'x, y, z' 
 '-x, -y, -z' 
  
_cell_length_a                    9.455(2) 
_cell_length_b                    12.0445(17) 
_cell_length_c                    16.493(2) 
_cell_angle_alpha                 87.469(10) 
_cell_angle_beta                  83.061(14) 
_cell_angle_gamma                 75.465(14) 
_cell_volume                      1804.7(5) 
_cell_formula_units_Z             2 
_cell_measurement_temperature     296(2) 
_cell_measurement_reflns_used     75 
_cell_measurement_theta_min       4.59 
_cell_measurement_theta_max       12.54 
  
_exptl_crystal_description        prism 
_exptl_crystal_colour             blue 
_exptl_crystal_size_max           0.40 
_exptl_crystal_size_mid           0.40 
_exptl_crystal_size_min           0.20 
_exptl_crystal_density_meas       ? 
_exptl_crystal_density_diffrn     1.721 
_exptl_crystal_density_method     'not measured' 
_exptl_crystal_F_000              948 
_exptl_absorpt_coefficient_mu     1.303 
_exptl_absorpt_correction_type    psi-scan 
_exptl_absorpt_correction_T_min   0.31049 
_exptl_absorpt_correction_T_max   0.35601 
_exptl_absorpt_process_details    'XSCANS (Siemens, 1996)' 
  
_exptl_special_details            ?
  
_diffrn_ambient_temperature       296(1) 
_diffrn_radiation_wavelength      0.71073 
_diffrn_radiation_type            MoK\a 
_diffrn_radiation_source          'fine-focus sealed tube' 
_diffrn_radiation_monochromator   graphite 
_diffrn_measurement_device_type   'Siemens P4' 
_diffrn_measurement_method        '\w scans' 
_diffrn_detector_area_resol_mean  ? 
_diffrn_standards_number          3 
_diffrn_standards_interval_count  97
loop_
 _diffrn_standard_refln_index_h
 _diffrn_standard_refln_index_k
 _diffrn_standard_refln_index_l
  1   1  -3  
  1   2   3  
  1  -2  -2  

_diffrn_standards_interval_time   ? 
_diffrn_standards_decay_%         2
_diffrn_reflns_number             14469 
_diffrn_reflns_av_R_equivalents   0.0306 
_diffrn_reflns_av_sigmaI/netI     0.0389 
_diffrn_reflns_limit_h_min        -11 
_diffrn_reflns_limit_h_max        11 
_diffrn_reflns_limit_k_min        -14 
_diffrn_reflns_limit_k_max        14 
_diffrn_reflns_limit_l_min        -20 
_diffrn_reflns_limit_l_max        20 
_diffrn_reflns_theta_min          1.75 
_diffrn_reflns_theta_max          26.25 
_reflns_number_total              7246 
_reflns_number_gt                 6004 
_reflns_threshold_expression      I>2\s(I) 
  
_computing_data_collection        'XSCANS (Siemens, 1996)'
_computing_cell_refinement         XSCANS
_computing_data_reduction          XSCANS
_computing_structure_solution     'SHELXS97 (Sheldrick, 2008)'
_computing_structure_refinement   'SHELXL97 (Sheldrick, 2008)'
_computing_molecular_graphics     'MERCURY CSD 2.0 (Macrae et al., 2006)'
_computing_publication_material    SHELXL97
  
_refine_special_details           ?
  
_refine_ls_structure_factor_coef  Fsqd 
_refine_ls_matrix_type            full 
_refine_ls_weighting_scheme       calc 
_refine_ls_weighting_details 
 'calc w=1/[\s^2^(Fo^2^)+(0.0673P)^2^+6.9514P] where P=(Fo^2^+2Fc^2^)/3' 
_atom_sites_solution_primary      direct 
_atom_sites_solution_secondary    difmap 
_atom_sites_solution_hydrogens    geom 
_refine_ls_hydrogen_treatment     mixed 
_refine_ls_extinction_method      none 
_refine_ls_extinction_coef        ? 
_refine_ls_number_reflns          7246 
_refine_ls_number_parameters      517 
_refine_ls_number_restraints      12
_refine_ls_number_constraints      0 
_refine_ls_R_factor_all           0.0753 
_refine_ls_R_factor_gt            0.0631 
_refine_ls_wR_factor_ref          0.1812 
_refine_ls_wR_factor_gt           0.1730 
_refine_ls_goodness_of_fit_ref    1.119 
_refine_ls_restrained_S_all       1.118 
_refine_ls_shift/su_max           0.010 
_refine_ls_shift/su_mean          0.000 
  
loop_ 
 _atom_site_label 
 _atom_site_type_symbol 
 _atom_site_fract_x 
 _atom_site_fract_y 
 _atom_site_fract_z 
 _atom_site_U_iso_or_equiv 
 _atom_site_adp_type 
 _atom_site_occupancy 
 _atom_site_symmetry_multiplicity 
 _atom_site_calc_flag 
 _atom_site_refinement_flags 
 _atom_site_disorder_assembly 
 _atom_site_disorder_group 
Cu1 Cu 0.43130(7) 0.27126(5) 0.37936(4) 0.03086(17) Uani 1 1 d . . . 
O1 O 0.5093(5) 0.3586(4) 0.4789(3) 0.0510(10) Uani 1 1 d D . . 
H1B H 0.454(6) 0.401(6) 0.516(3) 0.076 Uiso 1 1 d D . . 
H1C H 0.590(4) 0.335(6) 0.499(4) 0.076 Uiso 1 1 d D . . 
O2 O 0.5255(5) 0.3656(3) 0.2984(3) 0.0478(10) Uani 1 1 d D . . 
H2B H 0.591(5) 0.312(4) 0.275(4) 0.072 Uiso 1 1 d D . . 
H2C H 0.570(6) 0.408(5) 0.319(4) 0.072 Uiso 1 1 d D . . 
N1 N 0.7870(4) -0.0049(4) 0.4021(2) 0.0330(9) Uani 1 1 d . . . 
H1A H 0.8765 -0.0408 0.4071 0.040 Uiso 1 1 calc R . . 
C2 C 0.7438(5) 0.1028(4) 0.3733(3) 0.0339(10) Uani 1 1 d . . . 
N3 N 0.5984(4) 0.1307(3) 0.3733(2) 0.0301(8) Uani 1 1 d . . . 
C4 C 0.5511(5) 0.0357(4) 0.4022(3) 0.0266(9) Uani 1 1 d . . . 
C5 C 0.6657(5) -0.0492(4) 0.4226(3) 0.0282(9) Uani 1 1 d . . . 
C6 C 0.3886(5) 0.0485(4) 0.4071(3) 0.0290(9) Uani 1 1 d . . . 
H6A H 0.3591 0.0464 0.3529 0.035 Uiso 1 1 calc R . . 
H6B H 0.3605 -0.0128 0.4401 0.035 Uiso 1 1 calc R . . 
N7 N 0.3182(4) 0.1619(3) 0.4453(2) 0.0281(8) Uani 1 1 d . . . 
C8 C 0.1612(5) 0.2024(4) 0.4294(3) 0.0341(11) Uani 1 1 d . . . 
H8A H 0.0983 0.1748 0.4722 0.041 Uiso 1 1 calc R . . 
H8B H 0.1478 0.1734 0.3776 0.041 Uiso 1 1 calc R . . 
C9 C 0.1212(6) 0.3332(5) 0.4273(3) 0.0396(12) Uani 1 1 d . . . 
H9A H 0.0233 0.3618 0.4109 0.047 Uiso 1 1 calc R . . 
H9B H 0.1215 0.3619 0.4813 0.047 Uiso 1 1 calc R . . 
N10 N 0.2287(5) 0.3742(4) 0.3688(3) 0.0365(9) Uani 1 1 d . . . 
C11 C 0.1993(8) 0.3620(6) 0.2835(4) 0.0575(16) Uani 1 1 d . . . 
H11A H 0.1015 0.4054 0.2763 0.086 Uiso 1 1 calc R . . 
H11B H 0.2086 0.2826 0.2730 0.086 Uiso 1 1 calc R . . 
H11C H 0.2689 0.3902 0.2463 0.086 Uiso 1 1 calc R . . 
C12 C 0.2144(8) 0.4987(5) 0.3845(5) 0.0598(17) Uani 1 1 d . . . 
H12A H 0.1198 0.5430 0.3721 0.090 Uiso 1 1 calc R . . 
H12B H 0.2901 0.5245 0.3504 0.090 Uiso 1 1 calc R . . 
H12C H 0.2244 0.5082 0.4408 0.090 Uiso 1 1 calc R . . 
C13 C 0.8449(6) 0.1772(5) 0.3460(4) 0.0479(14) Uani 1 1 d . . . 
H13A H 0.7905 0.2476 0.3234 0.072 Uiso 1 1 calc R . . 
H13B H 0.9199 0.1384 0.3052 0.072 Uiso 1 1 calc R . . 
H13C H 0.8896 0.1937 0.3918 0.072 Uiso 1 1 calc R . . 
C14 C 0.6647(6) -0.1609(4) 0.4652(3) 0.0318(10) Uani 1 1 d . . . 
H14A H 0.7438 -0.2202 0.4387 0.038 Uiso 1 1 calc R . . 
H14B H 0.5728 -0.1799 0.4590 0.038 Uiso 1 1 calc R . . 
Cu2 Cu 0.87001(7) 0.75648(5) 0.13216(4) 0.03362(18) Uani 1 1 d . . . 
O21 O 0.9887(6) 0.8571(4) 0.0388(3) 0.0590(11) Uani 1 1 d D . . 
H21B H 0.937(7) 0.899(6) 0.005(3) 0.088 Uiso 1 1 d D . . 
H21C H 1.068(5) 0.825(7) 0.010(4) 0.088 Uiso 1 1 d D . . 
O22 O 0.9225(5) 0.8388(4) 0.2225(3) 0.0500(10) Uani 1 1 d D . . 
H22B H 0.958(7) 0.797(5) 0.262(3) 0.075 Uiso 1 1 d D . . 
H22C H 0.984(6) 0.879(5) 0.210(4) 0.075 Uiso 1 1 d D . . 
N21 N 1.2450(5) 0.4892(4) 0.0971(2) 0.0333(9) Uani 1 1 d . . . 
H21A H 1.3372 0.4554 0.0901 0.040 Uiso 1 1 calc R . . 
C22 C 1.1879(5) 0.5935(4) 0.1299(3) 0.0315(10) Uani 1 1 d . . . 
N23 N 1.0418(4) 0.6192(3) 0.1316(2) 0.0305(8) Uani 1 1 d . . . 
C24 C 1.0086(5) 0.5259(4) 0.0999(3) 0.0275(9) Uani 1 1 d . . . 
C25 C 1.1335(5) 0.4448(4) 0.0762(3) 0.0291(9) Uani 1 1 d . . . 
C26 C 0.8494(5) 0.5366(4) 0.0940(3) 0.0286(9) Uani 1 1 d . . . 
H26A H 0.7976 0.5281 0.1475 0.034 Uiso 1 1 calc R . . 
H26B H 0.8371 0.4784 0.0584 0.034 Uiso 1 1 calc R . . 
N27 N 0.7923(4) 0.6544(3) 0.0592(2) 0.0282(8) Uani 1 1 d . . . 
C28 C 0.6289(5) 0.6934(5) 0.0747(3) 0.0379(11) Uani 1 1 d . . . 
H28A H 0.5945 0.6635 0.1270 0.045 Uiso 1 1 calc R . . 
H28B H 0.5840 0.6660 0.0323 0.045 Uiso 1 1 calc R . . 
C29 C 0.5881(6) 0.8233(5) 0.0751(3) 0.0426(13) Uani 1 1 d . . . 
H29A H 0.6161 0.8529 0.0215 0.051 Uiso 1 1 calc R . . 
H29B H 0.4826 0.8516 0.0881 0.051 Uiso 1 1 calc R . . 
N30 N 0.6659(5) 0.8629(4) 0.1373(3) 0.0408(10) Uani 1 1 d . . . 
C31 C 0.5836(8) 0.8551(6) 0.2202(4) 0.0604(18) Uani 1 1 d . . . 
H31A H 0.4835 0.8985 0.2201 0.091 Uiso 1 1 calc R . . 
H31B H 0.6290 0.8855 0.2602 0.091 Uiso 1 1 calc R . . 
H31C H 0.5857 0.7763 0.2334 0.091 Uiso 1 1 calc R . . 
C32 C 0.6637(9) 0.9853(5) 0.1217(5) 0.0659(19) Uani 1 1 d . . . 
H32A H 0.5637 1.0299 0.1238 0.099 Uiso 1 1 calc R . . 
H32B H 0.7145 0.9939 0.0687 0.099 Uiso 1 1 calc R . . 
H32C H 0.7116 1.0116 0.1625 0.099 Uiso 1 1 calc R . . 
C33 C 1.2767(7) 0.6647(5) 0.1615(4) 0.0469(13) Uani 1 1 d . . . 
H33A H 1.2125 0.7268 0.1926 0.070 Uiso 1 1 calc R . . 
H33B H 1.3304 0.6951 0.1164 0.070 Uiso 1 1 calc R . . 
H33C H 1.3443 0.6183 0.1958 0.070 Uiso 1 1 calc R . . 
C34 C 1.1526(6) 0.3372(4) 0.0299(3) 0.0320(10) Uani 1 1 d . . . 
H34A H 1.0589 0.3170 0.0342 0.038 Uiso 1 1 calc R . . 
H34B H 1.2212 0.2757 0.0551 0.038 Uiso 1 1 calc R . . 
B1 B 1.1459(11) 1.0576(8) 0.1633(5) 0.066(2) Uani 1 1 d . . . 
F1 F 1.2130(10) 1.0987(7) 0.2161(5) 0.150(3) Uani 1 1 d . . . 
F2 F 1.2243(10) 1.0403(8) 0.0903(4) 0.173(4) Uani 1 1 d . . . 
F3 F 1.1113(13) 0.9670(8) 0.1983(7) 0.213(5) Uani 1 1 d . . . 
F4 F 1.0222(10) 1.1336(10) 0.1488(5) 0.196(5) Uani 1 1 d . . . 
B2 B 0.2488(8) 0.4447(6) 0.6669(4) 0.0474(15) Uani 1 1 d . . . 
F5 F 0.3942(6) 0.4263(5) 0.6758(5) 0.135(3) Uani 1 1 d . . . 
F6 F 0.2322(9) 0.4494(6) 0.5876(3) 0.129(2) Uani 1 1 d . . . 
F7 F 0.1785(6) 0.5462(4) 0.7023(3) 0.0905(15) Uani 1 1 d . . . 
F8 F 0.1959(6) 0.3579(4) 0.7059(4) 0.0972(17) Uani 1 1 d . . . 
B3 B 0.6241(7) 0.3026(6) 0.0944(4) 0.0457(15) Uani 1 1 d . . . 
F9 F 0.7140(8) 0.2568(6) 0.0284(3) 0.139(3) Uani 1 1 d . . . 
F10 F 0.6941(5) 0.2809(5) 0.1646(3) 0.0910(16) Uani 1 1 d . . . 
F11 F 0.4970(6) 0.2627(4) 0.1051(4) 0.0962(16) Uani 1 1 d . . . 
F12 F 0.5696(5) 0.4195(4) 0.0803(4) 0.0845(15) Uani 1 1 d . . . 
B4 B 0.8321(7) 0.1881(6) 0.5998(4) 0.0434(14) Uani 1 1 d . . . 
F13 F 0.7157(6) 0.1888(5) 0.6546(4) 0.113(2) Uani 1 1 d . . . 
F14 F 0.7909(6) 0.2591(4) 0.5339(3) 0.0910(16) Uani 1 1 d . . . 
F15 F 0.9372(6) 0.2275(4) 0.6327(3) 0.0802(13) Uani 1 1 d . . . 
F16 F 0.8991(4) 0.0780(3) 0.5719(3) 0.0715(12) Uani 1 1 d . . . 
  
loop_ 
 _atom_site_aniso_label 
 _atom_site_aniso_U_11 
 _atom_site_aniso_U_22 
 _atom_site_aniso_U_33 
 _atom_site_aniso_U_23 
 _atom_site_aniso_U_13 
 _atom_site_aniso_U_12 
Cu1 0.0326(3) 0.0287(3) 0.0306(3) 0.0023(2) -0.0028(2) -0.0071(2) 
O1 0.054(3) 0.055(3) 0.044(2) -0.0109(19) -0.0074(19) -0.013(2) 
O2 0.055(2) 0.042(2) 0.047(2) 0.0064(17) 0.0041(19) -0.0190(19) 
N1 0.0242(19) 0.039(2) 0.032(2) 0.0021(17) -0.0022(16) -0.0027(17) 
C2 0.032(2) 0.039(3) 0.030(2) 0.000(2) -0.0013(19) -0.008(2) 
N3 0.027(2) 0.029(2) 0.033(2) 0.0005(16) -0.0026(16) -0.0054(16) 
C4 0.028(2) 0.028(2) 0.023(2) -0.0056(17) -0.0012(17) -0.0061(18) 
C5 0.030(2) 0.031(2) 0.022(2) -0.0048(17) 0.0012(17) -0.0067(19) 
C6 0.029(2) 0.031(2) 0.028(2) -0.0019(18) -0.0064(18) -0.0066(19) 
N7 0.0263(19) 0.0280(19) 0.030(2) 0.0027(15) -0.0062(15) -0.0053(15) 
C8 0.023(2) 0.039(3) 0.037(3) 0.007(2) -0.0031(19) -0.005(2) 
C9 0.032(3) 0.041(3) 0.041(3) 0.002(2) -0.004(2) 0.001(2) 
N10 0.039(2) 0.031(2) 0.038(2) 0.0053(17) -0.0054(18) -0.0062(18) 
C11 0.061(4) 0.073(4) 0.038(3) 0.009(3) -0.018(3) -0.012(3) 
C12 0.062(4) 0.029(3) 0.081(5) 0.004(3) -0.001(3) -0.003(3) 
C13 0.033(3) 0.063(4) 0.054(3) 0.018(3) -0.010(2) -0.024(3) 
C14 0.037(3) 0.029(2) 0.027(2) -0.0041(18) -0.0026(19) -0.0039(19) 
Cu2 0.0377(3) 0.0315(3) 0.0314(3) -0.0069(2) -0.0044(2) -0.0068(3) 
O21 0.065(3) 0.056(3) 0.055(3) 0.008(2) 0.000(2) -0.018(2) 
O22 0.065(3) 0.044(2) 0.044(2) -0.0086(17) -0.019(2) -0.014(2) 
N21 0.030(2) 0.041(2) 0.027(2) -0.0009(17) -0.0064(16) -0.0037(17) 
C22 0.035(3) 0.040(3) 0.022(2) 0.0009(18) -0.0032(18) -0.013(2) 
N23 0.035(2) 0.034(2) 0.0230(19) -0.0038(15) -0.0019(16) -0.0091(17) 
C24 0.033(2) 0.032(2) 0.018(2) 0.0008(17) 0.0002(17) -0.0106(19) 
C25 0.033(2) 0.033(2) 0.021(2) -0.0009(17) -0.0031(18) -0.0073(19) 
C26 0.031(2) 0.030(2) 0.026(2) -0.0011(17) -0.0016(18) -0.0095(19) 
N27 0.028(2) 0.031(2) 0.0257(19) -0.0049(15) -0.0027(15) -0.0057(16) 
C28 0.029(3) 0.048(3) 0.036(3) -0.012(2) -0.002(2) -0.007(2) 
C29 0.038(3) 0.045(3) 0.038(3) -0.008(2) -0.006(2) 0.007(2) 
N30 0.045(3) 0.037(2) 0.038(2) -0.0061(18) -0.005(2) -0.0023(19) 
C31 0.061(4) 0.076(4) 0.034(3) -0.018(3) 0.006(3) 0.001(3) 
C32 0.075(5) 0.038(3) 0.083(5) -0.006(3) -0.022(4) -0.004(3) 
C33 0.047(3) 0.060(4) 0.040(3) -0.007(3) -0.004(2) -0.025(3) 
C34 0.039(3) 0.029(2) 0.026(2) 0.0004(18) -0.0039(19) -0.007(2) 
B1 0.085(6) 0.070(5) 0.047(4) 0.004(4) -0.009(4) -0.029(5) 
F1 0.189(8) 0.153(6) 0.144(6) -0.040(5) -0.047(6) -0.089(6) 
F2 0.194(8) 0.201(8) 0.078(4) -0.019(5) 0.035(5) 0.017(7) 
F3 0.324(14) 0.172(8) 0.229(10) 0.090(7) -0.140(10) -0.188(9) 
F4 0.143(7) 0.254(11) 0.130(6) 0.065(7) 0.003(5) 0.046(7) 
B2 0.051(4) 0.046(4) 0.044(4) -0.001(3) -0.001(3) -0.011(3) 
F5 0.064(3) 0.095(4) 0.245(9) 0.043(5) -0.031(4) -0.021(3) 
F6 0.205(7) 0.131(5) 0.047(3) -0.012(3) -0.016(4) -0.028(5) 
F7 0.117(4) 0.058(3) 0.089(3) -0.020(2) -0.006(3) -0.007(3) 
F8 0.100(4) 0.073(3) 0.120(4) 0.014(3) 0.015(3) -0.041(3) 
B3 0.042(3) 0.053(4) 0.040(3) 0.002(3) -0.007(3) -0.007(3) 
F9 0.138(5) 0.173(6) 0.044(3) -0.004(3) 0.010(3) 0.068(5) 
F10 0.072(3) 0.128(4) 0.059(3) -0.013(3) -0.022(2) 0.010(3) 
F11 0.090(4) 0.082(3) 0.131(5) 0.023(3) -0.041(3) -0.039(3) 
F12 0.061(3) 0.057(2) 0.134(4) 0.024(3) -0.024(3) -0.011(2) 
B4 0.036(3) 0.047(3) 0.046(3) -0.006(3) -0.011(3) -0.003(3) 
F13 0.087(4) 0.129(5) 0.111(4) -0.026(4) 0.050(3) -0.027(3) 
F14 0.103(4) 0.093(3) 0.067(3) 0.008(2) -0.040(3) 0.006(3) 
F15 0.094(3) 0.063(3) 0.095(3) 0.004(2) -0.049(3) -0.024(2) 
F16 0.055(2) 0.053(2) 0.102(3) -0.025(2) -0.011(2) -0.0005(18) 
  
_geom_special_details   ?
  
loop_ 
 _geom_bond_atom_site_label_1 
 _geom_bond_atom_site_label_2 
 _geom_bond_distance 
 _geom_bond_site_symmetry_2 
 _geom_bond_publ_flag 
Cu1 O2 1.988(4) . ? 
Cu1 N3 2.002(4) . ? 
Cu1 N10 2.026(4) . ? 
Cu1 N7 2.088(4) . ? 
Cu1 O1 2.276(4) . ? 
O1 H1B 0.848(10) . ? 
O1 H1C 0.848(10) . ? 
O2 H2B 0.846(10) . ? 
O2 H2C 0.845(10) . ? 
N1 C2 1.343(6) . ? 
N1 C5 1.383(6) . ? 
N1 H1A 0.8600 . ? 
C2 N3 1.330(6) . ? 
C2 C13 1.487(7) . ? 
N3 C4 1.376(6) . ? 
C4 C5 1.355(7) . ? 
C4 C6 1.498(6) . ? 
C5 C14 1.492(7) . ? 
C6 N7 1.491(6) . ? 
C6 H6A 0.9700 . ? 
C6 H6B 0.9700 . ? 
N7 C8 1.493(6) . ? 
N7 C14 1.504(6) 2_656 ? 
C8 C9 1.525(7) . ? 
C8 H8A 0.9700 . ? 
C8 H8B 0.9700 . ? 
C9 N10 1.476(7) . ? 
C9 H9A 0.9700 . ? 
C9 H9B 0.9700 . ? 
N10 C11 1.486(7) . ? 
N10 C12 1.503(7) . ? 
C11 H11A 0.9600 . ? 
C11 H11B 0.9600 . ? 
C11 H11C 0.9600 . ? 
C12 H12A 0.9600 . ? 
C12 H12B 0.9600 . ? 
C12 H12C 0.9600 . ? 
C13 H13A 0.9600 . ? 
C13 H13B 0.9600 . ? 
C13 H13C 0.9600 . ? 
C14 N7 1.504(6) 2_656 ? 
C14 H14A 0.9700 . ? 
C14 H14B 0.9700 . ? 
Cu2 O22 2.001(4) . ? 
Cu2 N23 2.006(4) . ? 
Cu2 N30 2.026(5) . ? 
Cu2 N27 2.073(4) . ? 
Cu2 O21 2.280(5) . ? 
O21 H21B 0.847(10) . ? 
O21 H21C 0.848(10) . ? 
O22 H22B 0.848(10) . ? 
O22 H22C 0.849(10) . ? 
N21 C22 1.346(6) . ? 
N21 C25 1.380(6) . ? 
N21 H21A 0.8600 . ? 
C22 N23 1.335(6) . ? 
C22 C33 1.490(7) . ? 
N23 C24 1.379(6) . ? 
C24 C25 1.358(7) . ? 
C24 C26 1.494(7) . ? 
C25 C34 1.495(6) . ? 
C26 N27 1.501(6) . ? 
C26 H26A 0.9700 . ? 
C26 H26B 0.9700 . ? 
N27 C28 1.491(6) . ? 
N27 C34 1.505(6) 2_765 ? 
C28 C29 1.515(8) . ? 
C28 H28A 0.9700 . ? 
C28 H28B 0.9700 . ? 
C29 N30 1.492(7) . ? 
C29 H29A 0.9700 . ? 
C29 H29B 0.9700 . ? 
N30 C32 1.481(8) . ? 
N30 C31 1.500(8) . ? 
C31 H31A 0.9600 . ? 
C31 H31B 0.9600 . ? 
C31 H31C 0.9600 . ? 
C32 H32A 0.9600 . ? 
C32 H32B 0.9600 . ? 
C32 H32C 0.9600 . ? 
C33 H33A 0.9600 . ? 
C33 H33B 0.9600 . ? 
C33 H33C 0.9600 . ? 
C34 N27 1.505(6) 2_765 ? 
C34 H34A 0.9700 . ? 
C34 H34B 0.9700 . ? 
B1 F3 1.308(11) . ? 
B1 F1 1.317(11) . ? 
B1 F2 1.331(11) . ? 
B1 F4 1.332(12) . ? 
B2 F6 1.332(9) . ? 
B2 F7 1.356(8) . ? 
B2 F5 1.362(9) . ? 
B2 F8 1.373(8) . ? 
B3 F9 1.344(8) . ? 
B3 F10 1.386(8) . ? 
B3 F12 1.392(8) . ? 
B3 F11 1.392(9) . ? 
B4 F13 1.335(8) . ? 
B4 F15 1.378(8) . ? 
B4 F14 1.384(8) . ? 
B4 F16 1.390(7) . ? 
  
loop_ 
 _geom_angle_atom_site_label_1 
 _geom_angle_atom_site_label_2 
 _geom_angle_atom_site_label_3 
 _geom_angle 
 _geom_angle_site_symmetry_1 
 _geom_angle_site_symmetry_3 
 _geom_angle_publ_flag 
O2 Cu1 N3 96.96(17) . . ? 
O2 Cu1 N10 91.79(17) . . ? 
N3 Cu1 N10 159.74(18) . . ? 
O2 Cu1 N7 169.21(17) . . ? 
N3 Cu1 N7 83.01(15) . . ? 
N10 Cu1 N7 85.02(16) . . ? 
O2 Cu1 O1 87.65(18) . . ? 
N3 Cu1 O1 96.27(17) . . ? 
N10 Cu1 O1 102.33(17) . . ? 
N7 Cu1 O1 103.09(16) . . ? 
Cu1 O1 H1B 125(5) . . ? 
Cu1 O1 H1C 126(5) . . ? 
H1B O1 H1C 104(2) . . ? 
Cu1 O2 H2B 99(5) . . ? 
Cu1 O2 H2C 115(5) . . ? 
H2B O2 H2C 106(3) . . ? 
C2 N1 C5 109.6(4) . . ? 
C2 N1 H1A 125.2 . . ? 
C5 N1 H1A 125.2 . . ? 
N3 C2 N1 109.2(4) . . ? 
N3 C2 C13 126.4(5) . . ? 
N1 C2 C13 124.4(5) . . ? 
C2 N3 C4 106.4(4) . . ? 
C2 N3 Cu1 139.0(4) . . ? 
C4 N3 Cu1 110.9(3) . . ? 
C5 C4 N3 110.5(4) . . ? 
C5 C4 C6 134.2(4) . . ? 
N3 C4 C6 115.2(4) . . ? 
C4 C5 N1 104.2(4) . . ? 
C4 C5 C14 129.2(4) . . ? 
N1 C5 C14 126.3(4) . . ? 
N7 C6 C4 106.1(4) . . ? 
N7 C6 H6A 110.5 . . ? 
C4 C6 H6A 110.5 . . ? 
N7 C6 H6B 110.5 . . ? 
C4 C6 H6B 110.5 . . ? 
H6A C6 H6B 108.7 . . ? 
C6 N7 C8 111.2(4) . . ? 
C6 N7 C14 112.2(3) . 2_656 ? 
C8 N7 C14 112.1(4) . 2_656 ? 
C6 N7 Cu1 102.8(3) . . ? 
C8 N7 Cu1 106.7(3) . . ? 
C14 N7 Cu1 111.3(3) 2_656 . ? 
N7 C8 C9 108.0(4) . . ? 
N7 C8 H8A 110.1 . . ? 
C9 C8 H8A 110.1 . . ? 
N7 C8 H8B 110.1 . . ? 
C9 C8 H8B 110.1 . . ? 
H8A C8 H8B 108.4 . . ? 
N10 C9 C8 109.6(4) . . ? 
N10 C9 H9A 109.8 . . ? 
C8 C9 H9A 109.8 . . ? 
N10 C9 H9B 109.8 . . ? 
C8 C9 H9B 109.8 . . ? 
H9A C9 H9B 108.2 . . ? 
C9 N10 C11 110.4(5) . . ? 
C9 N10 C12 108.6(4) . . ? 
C11 N10 C12 109.0(5) . . ? 
C9 N10 Cu1 108.4(3) . . ? 
C11 N10 Cu1 106.1(4) . . ? 
C12 N10 Cu1 114.3(4) . . ? 
N10 C11 H11A 109.5 . . ? 
N10 C11 H11B 109.5 . . ? 
H11A C11 H11B 109.5 . . ? 
N10 C11 H11C 109.5 . . ? 
H11A C11 H11C 109.5 . . ? 
H11B C11 H11C 109.5 . . ? 
N10 C12 H12A 109.5 . . ? 
N10 C12 H12B 109.5 . . ? 
H12A C12 H12B 109.5 . . ? 
N10 C12 H12C 109.5 . . ? 
H12A C12 H12C 109.5 . . ? 
H12B C12 H12C 109.5 . . ? 
C2 C13 H13A 109.5 . . ? 
C2 C13 H13B 109.5 . . ? 
H13A C13 H13B 109.5 . . ? 
C2 C13 H13C 109.5 . . ? 
H13A C13 H13C 109.5 . . ? 
H13B C13 H13C 109.5 . . ? 
C5 C14 N7 114.2(4) . 2_656 ? 
C5 C14 H14A 108.7 . . ? 
N7 C14 H14A 108.7 2_656 . ? 
C5 C14 H14B 108.7 . . ? 
N7 C14 H14B 108.7 2_656 . ? 
H14A C14 H14B 107.6 . . ? 
O22 Cu2 N23 96.65(17) . . ? 
O22 Cu2 N30 91.92(18) . . ? 
N23 Cu2 N30 164.77(18) . . ? 
O22 Cu2 N27 167.50(18) . . ? 
N23 Cu2 N27 82.99(16) . . ? 
N30 Cu2 N27 85.92(17) . . ? 
O22 Cu2 O21 89.82(19) . . ? 
N23 Cu2 O21 94.13(17) . . ? 
N30 Cu2 O21 98.47(19) . . ? 
N27 Cu2 O21 102.67(17) . . ? 
Cu2 O21 H21B 116(6) . . ? 
Cu2 O21 H21C 122(6) . . ? 
H21B O21 H21C 105(3) . . ? 
Cu2 O22 H22B 116(5) . . ? 
Cu2 O22 H22C 117(5) . . ? 
H22B O22 H22C 103(2) . . ? 
C22 N21 C25 109.7(4) . . ? 
C22 N21 H21A 125.1 . . ? 
C25 N21 H21A 125.1 . . ? 
N23 C22 N21 109.2(4) . . ? 
N23 C22 C33 126.7(5) . . ? 
N21 C22 C33 124.1(5) . . ? 
C22 N23 C24 106.2(4) . . ? 
C22 N23 Cu2 140.0(3) . . ? 
C24 N23 Cu2 110.3(3) . . ? 
C25 C24 N23 110.5(4) . . ? 
C25 C24 C26 133.6(4) . . ? 
N23 C24 C26 115.7(4) . . ? 
C24 C25 N21 104.3(4) . . ? 
C24 C25 C34 129.4(4) . . ? 
N21 C25 C34 126.0(4) . . ? 
C24 C26 N27 105.5(4) . . ? 
C24 C26 H26A 110.6 . . ? 
N27 C26 H26A 110.6 . . ? 
C24 C26 H26B 110.6 . . ? 
N27 C26 H26B 110.6 . . ? 
H26A C26 H26B 108.8 . . ? 
C28 N27 C26 111.9(4) . . ? 
C28 N27 C34 112.3(4) . 2_765 ? 
C26 N27 C34 111.9(3) . 2_765 ? 
C28 N27 Cu2 105.0(3) . . ? 
C26 N27 Cu2 102.4(3) . . ? 
C34 N27 Cu2 112.8(3) 2_765 . ? 
N27 C28 C29 107.7(4) . . ? 
N27 C28 H28A 110.2 . . ? 
C29 C28 H28A 110.2 . . ? 
N27 C28 H28B 110.2 . . ? 
C29 C28 H28B 110.2 . . ? 
H28A C28 H28B 108.5 . . ? 
N30 C29 C28 109.0(4) . . ? 
N30 C29 H29A 109.9 . . ? 
C28 C29 H29A 109.9 . . ? 
N30 C29 H29B 109.9 . . ? 
C28 C29 H29B 109.9 . . ? 
H29A C29 H29B 108.3 . . ? 
C32 N30 C29 109.3(5) . . ? 
C32 N30 C31 107.0(5) . . ? 
C29 N30 C31 108.9(5) . . ? 
C32 N30 Cu2 114.4(4) . . ? 
C29 N30 Cu2 107.1(3) . . ? 
C31 N30 Cu2 110.1(4) . . ? 
N30 C31 H31A 109.5 . . ? 
N30 C31 H31B 109.5 . . ? 
H31A C31 H31B 109.5 . . ? 
N30 C31 H31C 109.5 . . ? 
H31A C31 H31C 109.5 . . ? 
H31B C31 H31C 109.5 . . ? 
N30 C32 H32A 109.5 . . ? 
N30 C32 H32B 109.5 . . ? 
H32A C32 H32B 109.5 . . ? 
N30 C32 H32C 109.5 . . ? 
H32A C32 H32C 109.5 . . ? 
H32B C32 H32C 109.5 . . ? 
C22 C33 H33A 109.5 . . ? 
C22 C33 H33B 109.5 . . ? 
H33A C33 H33B 109.5 . . ? 
C22 C33 H33C 109.5 . . ? 
H33A C33 H33C 109.5 . . ? 
H33B C33 H33C 109.5 . . ? 
C25 C34 N27 114.2(4) . 2_765 ? 
C25 C34 H34A 108.7 . . ? 
N27 C34 H34A 108.7 2_765 . ? 
C25 C34 H34B 108.7 . . ? 
N27 C34 H34B 108.7 2_765 . ? 
H34A C34 H34B 107.6 . . ? 
F3 B1 F1 106.2(8) . . ? 
F3 B1 F2 115.3(10) . . ? 
F1 B1 F2 112.5(10) . . ? 
F3 B1 F4 108.2(10) . . ? 
F1 B1 F4 110.3(10) . . ? 
F2 B1 F4 104.3(8) . . ? 
F6 B2 F7 110.2(6) . . ? 
F6 B2 F5 109.3(7) . . ? 
F7 B2 F5 107.5(7) . . ? 
F6 B2 F8 111.1(7) . . ? 
F7 B2 F8 109.7(6) . . ? 
F5 B2 F8 109.0(6) . . ? 
F9 B3 F10 111.5(6) . . ? 
F9 B3 F12 109.0(6) . . ? 
F10 B3 F12 112.2(6) . . ? 
F9 B3 F11 111.6(7) . . ? 
F10 B3 F11 109.6(6) . . ? 
F12 B3 F11 102.6(5) . . ? 
F13 B4 F15 111.4(6) . . ? 
F13 B4 F14 110.5(6) . . ? 
F15 B4 F14 107.1(6) . . ? 
F13 B4 F16 111.5(6) . . ? 
F15 B4 F16 107.0(5) . . ? 
F14 B4 F16 109.1(5) . . ? 
  
loop_ 
 _geom_torsion_atom_site_label_1 
 _geom_torsion_atom_site_label_2 
 _geom_torsion_atom_site_label_3 
 _geom_torsion_atom_site_label_4 
 _geom_torsion 
 _geom_torsion_site_symmetry_1 
 _geom_torsion_site_symmetry_2 
 _geom_torsion_site_symmetry_3 
 _geom_torsion_site_symmetry_4 
 _geom_torsion_publ_flag 
C5 N1 C2 N3 -0.5(6) . . . . ? 
C5 N1 C2 C13 179.4(5) . . . . ? 
N1 C2 N3 C4 -0.9(5) . . . . ? 
C13 C2 N3 C4 179.1(5) . . . . ? 
N1 C2 N3 Cu1 153.9(4) . . . . ? 
C13 C2 N3 Cu1 -26.1(9) . . . . ? 
O2 Cu1 N3 C2 45.8(5) . . . . ? 
N10 Cu1 N3 C2 160.8(5) . . . . ? 
N7 Cu1 N3 C2 -145.0(5) . . . . ? 
O1 Cu1 N3 C2 -42.6(5) . . . . ? 
O2 Cu1 N3 C4 -160.1(3) . . . . ? 
N10 Cu1 N3 C4 -45.2(6) . . . . ? 
N7 Cu1 N3 C4 9.0(3) . . . . ? 
O1 Cu1 N3 C4 111.5(3) . . . . ? 
C2 N3 C4 C5 2.1(5) . . . . ? 
Cu1 N3 C4 C5 -160.5(3) . . . . ? 
C2 N3 C4 C6 -179.7(4) . . . . ? 
Cu1 N3 C4 C6 17.7(5) . . . . ? 
N3 C4 C5 N1 -2.3(5) . . . . ? 
C6 C4 C5 N1 180.0(5) . . . . ? 
N3 C4 C5 C14 171.9(4) . . . . ? 
C6 C4 C5 C14 -5.8(9) . . . . ? 
C2 N1 C5 C4 1.7(5) . . . . ? 
C2 N1 C5 C14 -172.7(4) . . . . ? 
C5 C4 C6 N7 131.8(5) . . . . ? 
N3 C4 C6 N7 -45.8(5) . . . . ? 
C4 C6 N7 C8 161.5(4) . . . . ? 
C4 C6 N7 C14 -72.0(5) . . . 2_656 ? 
C4 C6 N7 Cu1 47.7(4) . . . . ? 
O2 Cu1 N7 C6 58.3(9) . . . . ? 
N3 Cu1 N7 C6 -32.1(3) . . . . ? 
N10 Cu1 N7 C6 131.5(3) . . . . ? 
O1 Cu1 N7 C6 -127.0(3) . . . . ? 
O2 Cu1 N7 C8 -58.8(10) . . . . ? 
N3 Cu1 N7 C8 -149.2(3) . . . . ? 
N10 Cu1 N7 C8 14.4(3) . . . . ? 
O1 Cu1 N7 C8 115.9(3) . . . . ? 
O2 Cu1 N7 C14 178.6(8) . . . 2_656 ? 
N3 Cu1 N7 C14 88.1(3) . . . 2_656 ? 
N10 Cu1 N7 C14 -108.3(3) . . . 2_656 ? 
O1 Cu1 N7 C14 -6.7(3) . . . 2_656 ? 
C6 N7 C8 C9 -150.2(4) . . . . ? 
C14 N7 C8 C9 83.3(5) 2_656 . . . ? 
Cu1 N7 C8 C9 -38.8(4) . . . . ? 
N7 C8 C9 N10 53.0(5) . . . . ? 
C8 C9 N10 C11 76.4(5) . . . . ? 
C8 C9 N10 C12 -164.1(5) . . . . ? 
C8 C9 N10 Cu1 -39.4(5) . . . . ? 
O2 Cu1 N10 C9 -176.6(3) . . . . ? 
N3 Cu1 N10 C9 67.6(6) . . . . ? 
N7 Cu1 N10 C9 13.7(3) . . . . ? 
O1 Cu1 N10 C9 -88.6(3) . . . . ? 
O2 Cu1 N10 C11 64.8(4) . . . . ? 
N3 Cu1 N10 C11 -51.0(7) . . . . ? 
N7 Cu1 N10 C11 -104.9(4) . . . . ? 
O1 Cu1 N10 C11 152.8(4) . . . . ? 
O2 Cu1 N10 C12 -55.3(4) . . . . ? 
N3 Cu1 N10 C12 -171.1(5) . . . . ? 
N7 Cu1 N10 C12 135.0(4) . . . . ? 
O1 Cu1 N10 C12 32.7(4) . . . . ? 
C4 C5 C14 N7 -99.7(6) . . . 2_656 ? 
N1 C5 C14 N7 73.4(6) . . . 2_656 ? 
C25 N21 C22 N23 0.1(5) . . . . ? 
C25 N21 C22 C33 178.2(5) . . . . ? 
N21 C22 N23 C24 1.2(5) . . . . ? 
C33 C22 N23 C24 -176.8(5) . . . . ? 
N21 C22 N23 Cu2 -154.4(4) . . . . ? 
C33 C22 N23 Cu2 27.6(8) . . . . ? 
O22 Cu2 N23 C22 -49.5(5) . . . . ? 
N30 Cu2 N23 C22 -173.4(6) . . . . ? 
N27 Cu2 N23 C22 143.0(5) . . . . ? 
O21 Cu2 N23 C22 40.8(5) . . . . ? 
O22 Cu2 N23 C24 155.5(3) . . . . ? 
N30 Cu2 N23 C24 31.6(8) . . . . ? 
N27 Cu2 N23 C24 -11.9(3) . . . . ? 
O21 Cu2 N23 C24 -114.2(3) . . . . ? 
C22 N23 C24 C25 -2.1(5) . . . . ? 
Cu2 N23 C24 C25 161.4(3) . . . . ? 
C22 N23 C24 C26 -178.7(4) . . . . ? 
Cu2 N23 C24 C26 -15.1(5) . . . . ? 
N23 C24 C25 N21 2.1(5) . . . . ? 
C26 C24 C25 N21 177.8(5) . . . . ? 
N23 C24 C25 C34 -171.7(4) . . . . ? 
C26 C24 C25 C34 4.0(9) . . . . ? 
C22 N21 C25 C24 -1.4(5) . . . . ? 
C22 N21 C25 C34 172.7(4) . . . . ? 
C25 C24 C26 N27 -130.6(5) . . . . ? 
N23 C24 C26 N27 44.9(5) . . . . ? 
C24 C26 N27 C28 -161.0(4) . . . . ? 
C24 C26 N27 C34 72.0(4) . . . 2_765 ? 
C24 C26 N27 Cu2 -49.0(4) . . . . ? 
O22 Cu2 N27 C28 62.3(9) . . . . ? 
N23 Cu2 N27 C28 151.4(3) . . . . ? 
N30 Cu2 N27 C28 -18.1(3) . . . . ? 
O21 Cu2 N27 C28 -115.9(3) . . . . ? 
O22 Cu2 N27 C26 -54.7(9) . . . . ? 
N23 Cu2 N27 C26 34.4(3) . . . . ? 
N30 Cu2 N27 C26 -135.1(3) . . . . ? 
O21 Cu2 N27 C26 127.1(3) . . . . ? 
O22 Cu2 N27 C34 -175.1(7) . . . 2_765 ? 
N23 Cu2 N27 C34 -86.0(3) . . . 2_765 ? 
N30 Cu2 N27 C34 104.5(3) . . . 2_765 ? 
O21 Cu2 N27 C34 6.7(3) . . . 2_765 ? 
C26 N27 C28 C29 153.9(4) . . . . ? 
C34 N27 C28 C29 -79.3(5) 2_765 . . . ? 
Cu2 N27 C28 C29 43.6(4) . . . . ? 
N27 C28 C29 N30 -56.4(5) . . . . ? 
C28 C29 N30 C32 163.1(5) . . . . ? 
C28 C29 N30 C31 -80.3(5) . . . . ? 
C28 C29 N30 Cu2 38.7(5) . . . . ? 
O22 Cu2 N30 C32 59.9(4) . . . . ? 
N23 Cu2 N30 C32 -175.8(6) . . . . ? 
N27 Cu2 N30 C32 -132.5(4) . . . . ? 
O21 Cu2 N30 C32 -30.2(5) . . . . ? 
O22 Cu2 N30 C29 -178.8(4) . . . . ? 
N23 Cu2 N30 C29 -54.5(8) . . . . ? 
N27 Cu2 N30 C29 -11.2(4) . . . . ? 
O21 Cu2 N30 C29 91.1(4) . . . . ? 
O22 Cu2 N30 C31 -60.6(4) . . . . ? 
N23 Cu2 N30 C31 63.7(8) . . . . ? 
N27 Cu2 N30 C31 107.0(4) . . . . ? 
O21 Cu2 N30 C31 -150.7(4) . . . . ? 
C24 C25 C34 N27 101.6(6) . . . 2_765 ? 
N21 C25 C34 N27 -71.0(6) . . . 2_765 ? 
  
loop_ 
 _geom_hbond_atom_site_label_D 
 _geom_hbond_atom_site_label_H 
 _geom_hbond_atom_site_label_A 
 _geom_hbond_distance_DH 
 _geom_hbond_distance_HA 
 _geom_hbond_distance_DA 
 _geom_hbond_angle_DHA 
 _geom_hbond_site_symmetry_A 
 _geom_hbond_publ_flag
N1   H1A   F16   0.86       2.12      2.955(6)   162.3   2_756 .
N21  H21A  F12   0.86       2.12      2.954(6)   163.6   1_655 .
N1   H1A   F15   0.86       2.54      3.253(6)   140.9   2_756 .
N21  H21A  F11   0.86       2.45      3.149(7)   138.7   1_655 .
O1   H1B   F6    0.848(10)  2.23(4)   2.979(9)   147(7)  .     .
O1   H1C   F14   0.848(10)  2.030(15) 2.870(7)   171(6)  .     .
O2   H2B   F10   0.846(10)  1.96(5)   2.643(6)   137(7)  .     .
O2   H2C   F5    0.845(10)  2.11(4)   2.858(8)   148(7)  2_666 .
O2   H2C   F7    0.845(10)  2.55(4)   3.232(7)   139(5)  2_666 .
O21  H21B  F2    0.847(10)  2.29(3)   3.109(10)  162(8)  2_775 .
O21  H21B  F4    0.847(10)  2.55(6)   3.104(10)  124(6)  2_775 .
O21  H21C  F9    0.848(10)  2.08(2)   2.908(8)   164(7)  2_765 .
O22  H22B  F15   0.848(10)  2.08(4)   2.857(6)   152(7)  2_766 .
O22  H22C  F3    0.849(10)  1.782(18) 2.624(9)   172(7)  .     .
 
_diffrn_measured_fraction_theta_max    0.996 
_diffrn_reflns_theta_full              26.25 
_diffrn_measured_fraction_theta_full   0.996 
_refine_diff_density_max    0.865 
_refine_diff_density_min   -0.519 
_refine_diff_density_rms    0.102

#===========================================================================
# 6. SHELX CODE
#===========================================================================

_iucr_refine_instructions_details
;
TITL cudbo in P-1 LAST...
CELL 0.71073   9.4555  12.0445  16.4925  87.469  83.061  75.465
ZERR    2.00   0.0020   0.0017   0.0024   0.010   0.014   0.014
LATT  1
SFAC C H B N O F CU
UNIT 40 88 8 16 8 32 4
TEMP 23
 
L.S. 24
 
ACTA
 
OMIT     2   1   0
OMIT     7   3   1
OMIT     2   3   8
OMIT     3  -6   4
OMIT     3  -4   7
OMIT    -2  -2   7
OMIT     2   4   2
OMIT     5   0   7
OMIT     3  -5  10
OMIT     2   5   3
OMIT    -2   0   6
OMIT    -2  -4   7
OMIT     7   1   9
 
BOND $H
CONF
WPDB -2
FMAP 2
PLAN 10
 
EQIV $1 -x+1, -y+1, -z+1
EQIV $2 -x+2, -y, -z+1
EQIV $3 -x+2, -y+2, -z
EQIV $4 -x+2, -y+1, -z
EQIV $5 -x+2, -y+1, -z+1
EQIV $6 x+1, y, z
 
HTAB  O1    F6
HTAB  O1    F14
HTAB  O2    F10
HTAB  O2    F5_$1
HTAB  O2    F7_$1
HTAB  N1    F16_$2
HTAB  N1    F15_$2
HTAB  O21   F2_$3
HTAB  O21   F4_$3
HTAB  O21   F9_$4
HTAB  O22   F15_$5
HTAB  O22   F3
HTAB  N21   F12_$6
HTAB  N21   F11_$6
 
DFIX 0.85 0.01 O1  H1B
DFIX 0.85 0.01 O1  H1C
DFIX 1.34 0.02 H1B H1C
 
DFIX 0.85 0.01 O2  H2B
DFIX 0.85 0.01 O2  H2C
DFIX 1.34 0.02 H2B H2C
 
DFIX 0.85 0.01 O21  H21B
DFIX 0.85 0.01 O21  H21C
DFIX 1.34 0.02 H21B H21C
 
DFIX 0.85 0.01 O22  H22B
DFIX 0.85 0.01 O22  H22C
DFIX 1.34 0.02 H22B H22C
 
WGHT    0.067300    6.951400
FVAR       0.38290
CU1   7    0.431296    0.271256    0.379361    11.00000    0.03262    0.02869 =
         0.03056    0.00232   -0.00283   -0.00707
O1    5    0.509273    0.358597    0.478911    11.00000    0.05449    0.05506 =
         0.04446   -0.01091   -0.00743   -0.01300
H1B   2    0.453596    0.400772    0.515709    11.00000   -1.50000
H1C   2    0.589959    0.335280    0.499273    11.00000   -1.50000
O2    5    0.525519    0.365614    0.298445    11.00000    0.05481    0.04242 =
         0.04678    0.00636    0.00412   -0.01899
H2B   2    0.591040    0.312093    0.274788    11.00000   -1.50000
H2C   2    0.570466    0.408368    0.318542    11.00000   -1.50000
N1    4    0.787039   -0.004901    0.402100    11.00000    0.02419    0.03943 =
         0.03195    0.00215   -0.00219   -0.00272
AFIX  43
H1A   2    0.876510   -0.040825    0.407082    11.00000   -1.20000
AFIX   0
C2    1    0.743760    0.102798    0.373252    11.00000    0.03158    0.03914 =
         0.03021   -0.00018   -0.00132   -0.00834
N3    4    0.598430    0.130695    0.373344    11.00000    0.02720    0.02944 =
         0.03254    0.00049   -0.00258   -0.00545
C4    1    0.551080    0.035710    0.402245    11.00000    0.02849    0.02754 =
         0.02345   -0.00557   -0.00119   -0.00614
C5    1    0.665736   -0.049233    0.422581    11.00000    0.03036    0.03139 =
         0.02161   -0.00479    0.00120   -0.00673
C6    1    0.388613    0.048538    0.407059    11.00000    0.02884    0.03062 =
         0.02815   -0.00194   -0.00642   -0.00659
AFIX  23
H6A   2    0.359135    0.046412    0.352934    11.00000   -1.20000
H6B   2    0.360506   -0.012762    0.440114    11.00000   -1.20000
AFIX   0
N7    4    0.318182    0.161890    0.445264    11.00000    0.02629    0.02796 =
         0.02964    0.00273   -0.00621   -0.00528
C8    1    0.161181    0.202418    0.429398    11.00000    0.02345    0.03941 =
         0.03678    0.00708   -0.00309   -0.00457
AFIX  23
H8A   2    0.098296    0.174779    0.472250    11.00000   -1.20000
H8B   2    0.147843    0.173449    0.377634    11.00000   -1.20000
AFIX   0
C9    1    0.121217    0.333228    0.427268    11.00000    0.03155    0.04097 =
         0.04081    0.00207   -0.00413    0.00053
AFIX  23
H9A   2    0.023266    0.361822    0.410939    11.00000   -1.20000
H9B   2    0.121545    0.361858    0.481284    11.00000   -1.20000
AFIX   0
N10   4    0.228708    0.374170    0.368774    11.00000    0.03870    0.03133 =
         0.03776    0.00535   -0.00535   -0.00621
C11   1    0.199323    0.362025    0.283546    11.00000    0.06104    0.07270 =
         0.03823    0.00903   -0.01767   -0.01174
AFIX 137
H11A  2    0.101478    0.405387    0.276310    11.00000   -1.50000
H11B  2    0.208623    0.282622    0.272974    11.00000   -1.50000
H11C  2    0.268882    0.390219    0.246283    11.00000   -1.50000
AFIX   0
C12   1    0.214438    0.498728    0.384454    11.00000    0.06233    0.02936 =
         0.08096    0.00404   -0.00073   -0.00337
AFIX 137
H12A  2    0.119787    0.543001    0.372115    11.00000   -1.50000
H12B  2    0.290063    0.524518    0.350445    11.00000   -1.50000
H12C  2    0.224351    0.508206    0.440813    11.00000   -1.50000
AFIX   0
C13   1    0.844909    0.177184    0.346011    11.00000    0.03349    0.06286 =
         0.05353    0.01756   -0.01032   -0.02385
AFIX 137
H13A  2    0.790476    0.247578    0.323449    11.00000   -1.50000
H13B  2    0.919941    0.138355    0.305168    11.00000   -1.50000
H13C  2    0.889630    0.193655    0.391824    11.00000   -1.50000
AFIX   0
C14   1    0.664684   -0.160930    0.465175    11.00000    0.03651    0.02924 =
         0.02738   -0.00414   -0.00256   -0.00395
AFIX  23
H14A  2    0.743806   -0.220239    0.438708    11.00000   -1.20000
H14B  2    0.572807   -0.179931    0.458971    11.00000   -1.20000
AFIX   0
CU2   7    0.870008    0.756485    0.132156    11.00000    0.03768    0.03151 =
         0.03142   -0.00687   -0.00437   -0.00683
O21   5    0.988668    0.857067    0.038756    11.00000    0.06466    0.05621 =
         0.05503    0.00763   -0.00002   -0.01762
H21B  2    0.936964    0.898885    0.005125    11.00000   -1.50000
H21C  2    1.068210    0.825220    0.010221    11.00000   -1.50000
O22   5    0.922521    0.838763    0.222515    11.00000    0.06536    0.04435 =
         0.04439   -0.00860   -0.01889   -0.01364
H22B  2    0.957873    0.797071    0.261655    11.00000   -1.50000
H22C  2    0.983599    0.879326    0.209586    11.00000   -1.50000
N21   4    1.245038    0.489232    0.097063    11.00000    0.02953    0.04123 =
         0.02727   -0.00087   -0.00637   -0.00367
AFIX  43
H21A  2    1.337151    0.455415    0.090087    11.00000   -1.20000
AFIX   0
C22   1    1.187907    0.593456    0.129936    11.00000    0.03489    0.03986 =
         0.02184    0.00088   -0.00319   -0.01323
N23   4    1.041828    0.619181    0.131599    11.00000    0.03450    0.03431 =
         0.02298   -0.00378   -0.00193   -0.00906
C24   1    1.008631    0.525888    0.099936    11.00000    0.03321    0.03155 =
         0.01828    0.00077    0.00017   -0.01065
C25   1    1.133485    0.444828    0.076242    11.00000    0.03289    0.03257 =
         0.02139   -0.00092   -0.00306   -0.00734
C26   1    0.849363    0.536557    0.093991    11.00000    0.03058    0.02958 =
         0.02625   -0.00105   -0.00159   -0.00947
AFIX  23
H26A  2    0.797611    0.528094    0.147481    11.00000   -1.20000
H26B  2    0.837098    0.478437    0.058430    11.00000   -1.20000
AFIX   0
N27   4    0.792293    0.654384    0.059174    11.00000    0.02753    0.03095 =
         0.02569   -0.00494   -0.00273   -0.00566
C28   1    0.628950    0.693361    0.074735    11.00000    0.02936    0.04780 =
         0.03558   -0.01188   -0.00242   -0.00667
AFIX  23
H28A  2    0.594543    0.663464    0.126952    11.00000   -1.20000
H28B  2    0.584023    0.665973    0.032329    11.00000   -1.20000
AFIX   0
C29   1    0.588055    0.823285    0.075075    11.00000    0.03754    0.04471 =
         0.03756   -0.00794   -0.00587    0.00651
AFIX  23
H29A  2    0.616087    0.852855    0.021498    11.00000   -1.20000
H29B  2    0.482585    0.851596    0.088078    11.00000   -1.20000
AFIX   0
N30   4    0.665890    0.862935    0.137292    11.00000    0.04453    0.03662 =
         0.03774   -0.00606   -0.00533   -0.00231
C31   1    0.583601    0.855130    0.220182    11.00000    0.06068    0.07615 =
         0.03353   -0.01840    0.00574    0.00088
AFIX 137
H31A  2    0.483478    0.898542    0.220051    11.00000   -1.50000
H31B  2    0.628969    0.885520    0.260177    11.00000   -1.50000
H31C  2    0.585708    0.776336    0.233352    11.00000   -1.50000
AFIX   0
C32   1    0.663721    0.985350    0.121699    11.00000    0.07459    0.03800 =
         0.08336   -0.00571   -0.02153   -0.00383
AFIX 137
H32A  2    0.563746    1.029869    0.123823    11.00000   -1.50000
H32B  2    0.714451    0.993946    0.068657    11.00000   -1.50000
H32C  2    0.711561    1.011590    0.162508    11.00000   -1.50000
AFIX   0
C33   1    1.276697    0.664738    0.161496    11.00000    0.04742    0.06029 =
         0.03996   -0.00716   -0.00415   -0.02535
AFIX 137
H33A  2    1.212508    0.726816    0.192611    11.00000   -1.50000
H33B  2    1.330444    0.695058    0.116447    11.00000   -1.50000
H33C  2    1.344350    0.618271    0.195766    11.00000   -1.50000
AFIX   0
C34   1    1.152575    0.337226    0.029853    11.00000    0.03937    0.02927 =
         0.02632    0.00045   -0.00392   -0.00660
AFIX  23
H34A  2    1.058852    0.317037    0.034204    11.00000   -1.20000
H34B  2    1.221156    0.275653    0.055130    11.00000   -1.20000
AFIX   0
B1    3    1.145942    1.057629    0.163281    11.00000    0.08526    0.07001 =
         0.04661    0.00422   -0.00932   -0.02918
F1    6    1.213039    1.098688    0.216090    11.00000    0.18931    0.15331 =
         0.14368   -0.04022   -0.04716   -0.08856
F2    6    1.224281    1.040287    0.090287    11.00000    0.19402    0.20127 =
         0.07773   -0.01896    0.03463    0.01705
F3    6    1.111296    0.966982    0.198273    11.00000    0.32438    0.17236 =
         0.22889    0.08978   -0.13960   -0.18751
F4    6    1.022203    1.133623    0.148845    11.00000    0.14320    0.25408 =
         0.12989    0.06454    0.00250    0.04578
B2    3    0.248821    0.444711    0.666880    11.00000    0.05083    0.04620 =
         0.04368   -0.00093   -0.00130   -0.01120
F5    6    0.394231    0.426269    0.675767    11.00000    0.06441    0.09503 =
         0.24474    0.04254   -0.03118   -0.02059
F6    6    0.232229    0.449353    0.587636    11.00000    0.20458    0.13053 =
         0.04666   -0.01183   -0.01643   -0.02756
F7    6    0.178474    0.546225    0.702254    11.00000    0.11673    0.05796 =
         0.08897   -0.02004   -0.00552   -0.00692
F8    6    0.195874    0.357893    0.705929    11.00000    0.09994    0.07315 =
         0.12047    0.01380    0.01528   -0.04091
B3    3    0.624053    0.302625    0.094387    11.00000    0.04165    0.05346 =
         0.04002    0.00231   -0.00711   -0.00732
F9    6    0.714039    0.256808    0.028437    11.00000    0.13764    0.17260 =
         0.04362   -0.00371    0.01031    0.06830
F10   6    0.694078    0.280865    0.164631    11.00000    0.07195    0.12789 =
         0.05940   -0.01345   -0.02249    0.00963
F11   6    0.496954    0.262685    0.105056    11.00000    0.09038    0.08239 =
         0.13056    0.02269   -0.04078   -0.03950
F12   6    0.569644    0.419514    0.080264    11.00000    0.06079    0.05724 =
         0.13426    0.02363   -0.02374   -0.01093
B4    3    0.832091    0.188065    0.599763    11.00000    0.03610    0.04670 =
         0.04554   -0.00590   -0.01125   -0.00294
F13   6    0.715739    0.188843    0.654595    11.00000    0.08677    0.12948 =
         0.11070   -0.02601    0.04979   -0.02675
F14   6    0.790933    0.259072    0.533946    11.00000    0.10344    0.09328 =
         0.06685    0.00778   -0.04006    0.00563
F15   6    0.937178    0.227541    0.632709    11.00000    0.09392    0.06307 =
         0.09547    0.00377   -0.04896   -0.02407
F16   6    0.899050    0.078050    0.571852    11.00000    0.05520    0.05259 =
         0.10238   -0.02492   -0.01101   -0.00050
 
HKLF      4
 
REM  cudbo in P-1 LAST...
REM R1 =  0.0631 for   6004 Fo > 4sig(Fo)  and  0.0753 for all   7246 data
REM    517 parameters refined using     12 restraints
 
END  
     
WGHT      0.0679      6.7312 
REM Highest difference peak  0.865,  deepest hole -0.519,  1-sigma level  0.102
Q1    1   1.2849  0.7982  0.1250  11.00000  0.05    0.86
Q2    1   0.4637  0.7210  0.1248  11.00000  0.05    0.86
Q3    1   1.0020  1.0385  0.1795  11.00000  0.05    0.85
Q4    1   0.6359  0.2795  0.3662  11.00000  0.05    0.68
Q5    1   0.2249  0.2568  0.3617  11.00000  0.05    0.65
Q6    1   0.1426  0.4341  0.6174  11.00000  0.05    0.65
Q7    1   1.2300  0.9514  0.1241  11.00000  0.05    0.62
Q8    1   0.0362  0.3219  0.3693  11.00000  0.05    0.62
Q9    1   0.3891  0.3563  0.6417  11.00000  0.05    0.62
Q10   1   0.7808  0.3023  0.0554  11.00000  0.05    0.59
;

#===========================================================================
# 7. Structure factors for 1
#===========================================================================

# 
# h,k,l, Fc-squared, Fo-squared, sigma(Fo-squared) and status flag 
# 
#data_cudbo 

_shelx_title ' cudbo in P-1 LAST...' 
_shelx_refln_list_code          4 
_shelx_F_calc_maximum      246.92 
#_exptl_crystal_F_000       948.00 
_reflns_d_resolution_high  0.8035 
 
#loop_ 
# _symmetry_equiv_pos_as_xyz 
# 'x, y, z' 
# '-x, -y, -z' 
 
#_cell_length_a     9.4555 
#_cell_length_b    12.0445 
#_cell_length_c    16.4925 
#_cell_angle_alpha  87.469 
#_cell_angle_beta   83.061 
#_cell_angle_gamma  75.465 
# 
_shelx_F_squared_multiplier     1.000 
 
loop_ 
 _refln_index_h 
 _refln_index_k 
 _refln_index_l 
 _refln_F_squared_calc 
 _refln_F_squared_meas 
 _refln_F_squared_sigma 
 _refln_observed_status 
   1   0   0       47.66       49.26      3.48 o 
   2   0   0     4875.57     5398.61     98.56 o 
   3   0   0     8671.37     8641.44    108.62 o 
   4   0   0      923.36      812.97     23.12 o 
   5   0   0     1020.32     1158.38     30.03 o 
   6   0   0       97.70       69.32      5.97 o 
   7   0   0     1517.62     1651.46     43.68 o 
   8   0   0        0.64        6.24      5.66 o 
   9   0   0      342.91      317.36     10.27 o 
  10   0   0       47.16       69.62     18.38 o 
  11   0   0      199.52      178.75     34.48 o 
 -11   1   0       46.92       36.64     11.42 o 
 -10   1   0      954.60     1044.14     42.05 o 
  -9   1   0       27.61       48.59      6.26 o 
  -8   1   0       10.07        8.01     14.08 o 
  -7   1   0      215.58      206.66     21.83 o 
  -6   1   0      374.44      342.74     25.00 o 
  -5   1   0     2441.73     2953.96    152.51 o 
  -4   1   0     8823.41     8295.82    254.78 o 
  -3   1   0    24078.02    24167.80    187.23 o 
  -2   1   0     2060.61     2018.72     46.34 o 
  -1   1   0     9351.63     8741.91     72.72 o 
   0   1   0      135.38       34.82      1.47 o 
   1   1   0     6395.25     5589.98    118.10 o 
   3   1   0      349.13      277.44      8.93 o 
   4   1   0      991.87      724.80     21.90 o 
   5   1   0        6.01       58.47      7.59 o 
   6   1   0      538.63      433.95     23.05 o 
   7   1   0       86.86       77.00      8.22 o 
   8   1   0       52.55       50.52      6.54 o 
   9   1   0        4.84        3.94      6.21 o 
  10   1   0      910.89      825.97     23.97 o 
  11   1   0       70.09       85.01     13.62 o 
 -10   2   0       15.06       24.70     12.15 o 
  -9   2   0       23.54       15.26     10.37 o 
  -8   2   0       33.84       35.25      9.31 o 
  -7   2   0      187.33      224.08     17.02 o 
  -6   2   0       52.11       53.50      5.95 o 
  -5   2   0      660.98      653.41     63.16 o 
  -4   2   0     5795.49     6074.24    105.27 o 
  -3   2   0     1553.45     1673.85     68.75 o 
  -2   2   0    10573.09    11041.68    117.48 o 
  -1   2   0      287.08      255.40      6.67 o 
   0   2   0     8062.28     7137.30     69.20 o 
   1   2   0     2570.70     3093.85     77.79 o 
   2   2   0       17.62       41.53      7.03 o 
   3   2   0        8.03       16.20      3.01 o 
   4   2   0       46.59       44.71      7.40 o 
   5   2   0     1224.85     1154.01     30.58 o 
   6   2   0       21.51       27.55      7.23 o 
   7   2   0     4897.42     5079.60    110.15 o 
   8   2   0      112.75      155.35      9.00 o 
   9   2   0       23.43       22.36      7.20 o 
  10   2   0       37.93       26.49     26.57 o 
  11   2   0       33.73       49.75     12.16 o 
 -10   3   0      112.60      121.68     14.24 o 
  -9   3   0       17.98        3.56     10.50 o 
  -8   3   0      190.44      161.72      8.17 o 
  -7   3   0       61.05       66.81      6.73 o 
  -6   3   0     1367.16     1331.26     48.56 o 
  -5   3   0       38.21       57.34      7.81 o 
  -4   3   0     4052.75     4209.07     84.01 o 
  -3   3   0    20348.18    19252.77    463.69 o 
  -2   3   0      306.88      295.69      7.45 o 
  -1   3   0     1165.10      887.17     23.90 o 
   0   3   0        0.53        6.87      2.83 o 
   1   3   0    12804.59    13301.44    115.78 o 
   2   3   0      553.22      419.20     62.78 o 
   3   3   0     5200.10     4594.02    204.79 o 
   4   3   0     2167.75     1980.79     63.76 o 
   5   3   0      292.88      411.95     17.43 o 
   6   3   0     4594.59     4032.55    178.63 o 
   7   3   0      601.89      700.10     19.32 o 
   8   3   0       13.37       20.67      6.36 o 
   9   3   0       67.25       62.62      7.79 o 
  10   3   0      404.25      425.50     18.42 o 
  11   3   0        2.44        1.71     11.27 o 
 -10   4   0       46.71       55.52     12.54 o 
  -9   4   0       58.91       72.19     12.53 o 
  -8   4   0       23.99       35.38     10.70 o 
  -7   4   0     1485.83     1705.12     50.20 o 
  -6   4   0        2.91       16.09      5.80 o 
  -5   4   0       12.72        6.42      5.42 o 
  -4   4   0     4196.68     3767.80    113.53 o 
  -3   4   0     1290.94     1250.83     57.09 o 
  -2   4   0      546.66      769.81     19.42 o 
  -1   4   0        4.64        5.24      5.01 o 
   0   4   0     2056.12     1824.30     51.62 o 
   1   4   0        4.11        2.43      2.59 o 
   2   4   0      406.75      453.68     25.92 o 
   3   4   0     1870.90     1840.85     59.04 o 
   4   4   0      100.03      105.44     16.51 o 
   5   4   0      474.45      335.22     27.35 o 
   6   4   0      957.04      964.70    102.38 o 
   7   4   0      506.69      583.20     33.28 o 
   8   4   0        0.23       15.27      7.04 o 
   9   4   0      816.00      868.88     67.83 o 
  10   4   0      219.48      202.08     15.11 o 
  11   4   0        6.95       13.66     11.79 o 
  -9   5   0       46.48       45.49     11.73 o 
  -8   5   0      111.83      124.97     13.54 o 
  -7   5   0      553.96      511.21     13.88 o 
  -6   5   0      180.15      170.11     13.44 o 
  -5   5   0      161.22      154.77     16.81 o 
  -4   5   0     1288.58     1256.95     34.26 o 
  -3   5   0      663.84      622.18     19.10 o 
  -2   5   0      172.62      120.05     24.11 o 
  -1   5   0      642.38      410.69     12.62 o 
   0   5   0        2.86       34.12      3.39 o 
   1   5   0      445.35      534.19     15.23 o 
   2   5   0      444.17     1044.95     29.36 o 
   3   5   0     2932.82     3106.41     77.15 o 
   4   5   0      548.96      402.38     27.11 o 
   5   5   0       33.75       23.52      9.11 o 
   6   5   0     4390.65     4225.16    272.96 o 
   7   5   0      203.14      274.76     17.90 o 
   8   5   0      846.34      879.56     73.49 o 
   9   5   0      764.56      828.58     64.62 o 
  10   5   0       93.80       93.70     13.33 o 
  11   5   0        0.24        5.03     18.31 o 
  -9   6   0       18.22       19.39     18.35 o 
  -8   6   0       13.53       28.39     10.64 o 
  -7   6   0     1045.08     1046.84     22.85 o 
  -6   6   0      888.96      863.02     23.12 o 
  -5   6   0      204.26      202.51      8.49 o 
  -4   6   0      886.99      891.59     37.58 o 
  -3   6   0       18.17      274.11     17.22 o 
  -2   6   0       22.44       18.70      9.07 o 
  -1   6   0      173.52      143.62     18.72 o 
   0   6   0      451.85      303.58      9.89 o 
   1   6   0        6.40        6.24      3.38 o 
   2   6   0     2762.78     2906.33    106.54 o 
   3   6   0     8323.99     8179.89    133.21 o 
   4   6   0     1021.56     1083.37     28.50 o 
   5   6   0     2095.96     1867.93     56.43 o 
   6   6   0       43.90       25.98      6.74 o 
   7   6   0      305.00      316.83     23.36 o 
   8   6   0       11.97        6.96      6.33 o 
   9   6   0      104.74      104.66      8.43 o 
  10   6   0      102.72      139.05     13.07 o 
  11   6   0       27.45        0.96     14.87 o 
  -8   7   0      294.48      331.56     15.89 o 
  -7   7   0      163.59      177.84     13.62 o 
  -6   7   0      102.40      135.47     10.47 o 
  -5   7   0      315.59      334.66     20.46 o 
  -4   7   0      134.48      138.28      7.75 o 
  -3   7   0       78.66      130.42      8.14 o 
  -2   7   0       27.10       58.33     15.35 o 
  -1   7   0     2121.17     1782.54     47.30 o 
   0   7   0      415.79      310.55     30.66 o 
   1   7   0     3910.63     3786.33    179.55 o 
   2   7   0     2128.94     1886.47     63.98 o 
   3   7   0     3846.36     3107.44     70.43 o 
   4   7   0     2013.80     2136.57    130.61 o 
   5   7   0      410.95      381.62     12.98 o 
   6   7   0     2980.00     2798.75     84.85 o 
   7   7   0      147.91       51.20     22.78 o 
   8   7   0      158.10      137.53      8.99 o 
   9   7   0      200.24      256.79     14.42 o 
  10   7   0      123.90      108.69     14.76 o 
  11   7   0        0.80      -14.90     29.33 o 
  -8   8   0        0.32       -4.93     11.63 o 
  -7   8   0       38.82       31.05     10.73 o 
  -6   8   0       26.38       25.12      8.60 o 
  -5   8   0      290.89      284.62     16.34 o 
  -4   8   0      312.32      316.60      9.57 o 
  -3   8   0       44.70       59.50      5.73 o 
  -2   8   0     1037.06     1015.44     23.92 o 
  -1   8   0       23.78       18.48      9.34 o 
   0   8   0     2020.96     2028.45    109.54 o 
   1   8   0       20.11       17.39      4.72 o 
   2   8   0     4324.91     4621.99    207.86 o 
   3   8   0     3084.26     2786.17     62.24 o 
   4   8   0       18.83       15.01      5.80 o 
   5   8   0      756.61      728.25     20.88 o 
   6   8   0        0.36       -0.87      4.83 o 
   7   8   0        5.08      -13.23     13.23 o 
   8   8   0       33.65       17.14      6.29 o 
   9   8   0      787.34      756.96     21.12 o 
  10   8   0       19.85       31.22     13.52 o 
  11   8   0        7.55       20.92     11.73 o 
  -7   9   0       42.97       50.88     11.16 o 
  -6   9   0        0.57       -0.14      9.67 o 
  -5   9   0      386.17      380.36     14.97 o 
  -4   9   0      126.37      164.79      7.88 o 
  -3   9   0        4.75        0.26      8.53 o 
  -2   9   0        1.14        3.19      6.24 o 
  -1   9   0     5138.39     5461.36     72.47 o 
   0   9   0      424.39      410.16     10.61 o 
   1   9   0       30.68       18.26      6.27 o 
   2   9   0     2198.23     2216.38     69.16 o 
   3   9   0      434.92      399.18     11.17 o 
   4   9   0       29.49       40.16      8.01 o 
   5   9   0       47.70       52.54      7.07 o 
   6   9   0      648.71      590.65     72.16 o 
   7   9   0        0.57       -4.01      5.61 o 
   8   9   0      459.97      385.14     19.51 o 
   9   9   0      117.23      160.03     21.93 o 
  10   9   0      152.12      152.81     23.60 o 
  -6  10   0       15.37        7.09     12.48 o 
  -5  10   0      103.56      148.58     12.86 o 
  -4  10   0     1153.60     1190.21     46.31 o 
  -3  10   0        9.40       -8.34     10.57 o 
  -2  10   0      477.29      476.16     10.94 o 
  -1  10   0       70.98       52.95      6.13 o 
   0  10   0     2251.76     2371.91     43.14 o 
   1  10   0        2.08       -5.94      5.94 o 
   2  10   0     1570.63     1645.38     64.15 o 
   3  10   0     1273.69     1351.22     47.33 o 
   4  10   0        0.17       36.28      6.72 o 
   5  10   0     2094.83     1996.58     39.19 o 
   6  10   0      144.88      144.00     10.23 o 
   7  10   0      254.59      240.84     12.35 o 
   8  10   0       51.91       54.33     11.37 o 
   9  10   0      751.86      740.89     61.66 o 
  10  10   0       51.17       50.33     14.02 o 
  -5  11   0      140.55      158.73     15.32 o 
  -4  11   0       71.30       89.85     10.56 o 
  -3  11   0      695.22      708.80     46.75 o 
  -2  11   0       31.46       30.11      7.99 o 
  -1  11   0      992.36     1176.17     24.32 o 
   0  11   0      254.66      271.86     13.44 o 
   1  11   0       24.83       23.98      5.29 o 
   2  11   0      335.53      312.69     25.88 o 
   3  11   0        4.01        7.35      5.78 o 
   4  11   0      311.82      307.32     10.22 o 
   5  11   0        9.00        5.74      5.35 o 
   6  11   0      327.37      310.54     23.02 o 
   7  11   0       13.84       16.56      9.49 o 
   8  11   0      114.94      106.86     13.27 o 
   9  11   0       92.63      110.73     34.44 o 
  -4  12   0      373.33      414.68     17.27 o 
  -3  12   0        0.01        5.56      8.60 o 
  -2  12   0      264.15      276.23     14.83 o 
  -1  12   0      139.42      160.08     36.59 o 
   0  12   0      152.32      158.30     13.91 o 
   1  12   0      129.53      108.50      8.93 o 
   2  12   0       16.09       11.80     10.37 o 
   3  12   0      479.41      476.03     14.80 o 
   4  12   0       47.44       36.32      5.50 o 
   5  12   0      871.74      994.38     25.75 o 
   6  12   0       66.49       89.81     15.31 o 
   7  12   0        3.40       18.39      9.74 o 
   8  12   0        0.68        2.16     10.43 o 
   9  12   0      377.58      343.12     23.29 o 
  -3  13   0      195.86      208.61     15.84 o 
  -2  13   0        7.21        1.94      8.60 o 
  -1  13   0      574.11      621.44     19.48 o 
   0  13   0       45.58       44.45     10.45 o 
   1  13   0      466.09      387.80     15.33 o 
   2  13   0      212.55      230.18     26.05 o 
   3  13   0        0.47       11.63      8.41 o 
   4  13   0       92.56       74.14     11.31 o 
   5  13   0       36.70       38.88     10.08 o 
   6  13   0      469.99      471.84     18.81 o 
   7  13   0       24.67       28.72     11.36 o 
   8  13   0      196.24      175.42     41.23 o 
  -1  14   0       55.93       77.80     18.93 o 
   0  14   0       11.49        7.96      9.72 o 
   1  14   0      144.35      190.11     13.83 o 
   2  14   0       65.93       65.59     11.77 o 
   3  14   0      214.02      220.90     13.71 o 
   4  14   0        0.28      -11.59     11.71 o 
   5  14   0      410.43      467.98     43.62 o 
   6  14   0       23.68       51.36     11.45 o 
  -6 -14   1       93.85      102.43     12.87 o 
  -5 -14   1       24.29       33.00     10.50 o 
  -4 -14   1      328.29      359.93     16.28 o 
  -3 -14   1        1.91       -6.41      9.54 o 
  -2 -14   1        3.14        2.15      8.49 o 
  -1 -14   1        2.33       24.04     10.36 o 
   0 -14   1      420.44      411.83     18.16 o 
   1 -14   1        6.56       14.70      8.40 o 
  -7 -13   1      229.10      209.38     16.39 o 
  -6 -13   1       66.78      100.83     19.95 o 
  -5 -13   1      131.36      142.05     13.91 o 
  -4 -13   1      255.95      241.02     15.36 o 
  -3 -13   1       55.27       59.15      9.38 o 
  -2 -13   1        3.69        8.19      8.79 o 
  -1 -13   1      717.93      794.65     20.93 o 
   0 -13   1        4.36       10.62      8.71 o 
   1 -13   1       59.08       48.02      9.33 o 
   2 -13   1      134.01      111.10     17.32 o 
   3 -13   1      154.62      173.65     14.17 o 
  -8 -12   1        0.93        1.54     10.33 o 
  -7 -12   1      322.31      297.05     25.75 o 
  -6 -12   1       95.12       95.20     14.60 o 
  -5 -12   1      181.04      182.19     43.17 o 
  -4 -12   1      333.77      303.68     15.49 o 
  -3 -12   1      210.77      228.41     16.03 o 
  -2 -12   1        0.36        2.77      4.48 o 
  -1 -12   1       43.62       51.23      5.61 o 
   0 -12   1      981.95      977.14     21.48 o 
   1 -12   1       35.69       33.88      8.41 o 
   2 -12   1      483.86      556.69     17.29 o 
   3 -12   1      349.46      376.49     18.82 o 
   4 -12   1        2.35       -9.10     12.47 o 
  -9 -11   1        8.24       13.18     12.73 o 
  -8 -11   1      325.58      346.17     23.09 o 
  -7 -11   1      182.80      163.92     30.90 o 
  -6 -11   1      138.02      122.73     20.29 o 
  -5 -11   1      154.62      152.82      8.58 o 
  -4 -11   1      446.79      386.08     11.10 o 
  -3 -11   1      945.19      999.27     35.71 o 
  -2 -11   1       10.12        7.73      5.06 o 
  -1 -11   1      436.50      437.17     10.97 o 
   0 -11   1       83.83       94.11      6.51 o 
   1 -11   1        8.84       17.20     12.07 o 
   2 -11   1      343.67      344.13     14.35 o 
   3 -11   1      372.21      362.58     17.87 o 
   4 -11   1       18.21       22.70     15.21 o 
   5 -11   1       12.97        3.16     10.65 o 
 -10 -10   1       10.25       -7.12     13.11 o 
  -9 -10   1        0.42        3.50     10.83 o 
  -8 -10   1      135.30      126.11     23.05 o 
  -7 -10   1      504.57      501.67     21.52 o 
  -6 -10   1        5.53       -1.42      8.29 o 
  -5 -10   1       66.55       54.78      6.65 o 
  -4 -10   1      120.17      176.51     23.29 o 
  -3 -10   1      289.97      296.87     10.33 o 
  -2 -10   1     1563.47     1557.16     43.14 o 
  -1 -10   1       43.89       40.56      5.79 o 
   0 -10   1      892.27      826.01     55.31 o 
   1 -10   1      271.19      277.51      9.21 o 
   2 -10   1      547.20      490.93     11.04 o 
   3 -10   1      968.76     1039.15     22.56 o 
   4 -10   1       20.22       22.96     18.55 o 
   5 -10   1      164.49      191.56     11.83 o 
   6 -10   1        0.64       11.84     17.49 o 
 -10  -9   1      168.67      126.02     13.93 o 
  -9  -9   1        4.08       25.21     10.54 o 
  -8  -9   1      642.19      665.73     55.93 o 
  -7  -9   1      187.30      191.60      9.04 o 
  -6  -9   1        0.91        1.42      5.86 o 
  -5  -9   1      218.95      193.98      8.98 o 
  -4  -9   1     1292.08     1270.64     37.77 o 
  -3  -9   1      310.15      317.05     14.19 o 
  -2  -9   1        6.30       22.12      5.20 o 
  -1  -9   1     7399.87     7470.11    149.37 o 
   0  -9   1      289.80      332.10      9.85 o 
   1  -9   1       26.85       14.61      5.26 o 
   2  -9   1      245.62      291.03     22.44 o 
   3  -9   1       41.71       59.62      5.76 o 
   4  -9   1      692.70      721.19     20.36 o 
   5  -9   1       59.54       63.94     12.48 o 
   6  -9   1      102.42      111.94     12.33 o 
   7  -9   1        1.46      -10.26     10.27 o 
 -11  -8   1      308.96      298.20     20.05 o 
 -10  -8   1       11.68       15.50     10.20 o 
  -9  -8   1       53.50       60.17     16.78 o 
  -8  -8   1       26.86       35.56     13.88 o 
  -7  -8   1     1103.27     1078.04     73.53 o 
  -6  -8   1      362.64      345.85     26.40 o 
  -5  -8   1      231.29      227.35     10.74 o 
  -4  -8   1     1448.88     1788.80    105.04 o 
  -3  -8   1      383.34      352.05     15.07 o 
  -2  -8   1      474.71      315.09     10.11 o 
  -1  -8   1     1445.38     1410.97     45.45 o 
   0  -8   1     1020.84     1020.72     52.04 o 
   1  -8   1       35.72       45.69      5.61 o 
   2  -8   1     1033.93      993.18     29.23 o 
   3  -8   1      172.22      167.07      7.35 o 
   4  -8   1        3.94        5.09      9.62 o 
   5  -8   1     1405.09     1458.71     27.92 o 
   6  -8   1        0.79       -8.07      9.29 o 
   7  -8   1      137.53      101.64     29.94 o 
   8  -8   1       15.12       18.69     10.21 o 
 -11  -7   1       17.14        5.90     12.85 o 
 -10  -7   1       73.85       47.08     11.60 o 
  -9  -7   1        6.81        0.03     14.94 o 
  -8  -7   1      214.91      221.25     26.29 o 
  -7  -7   1      203.28      210.16     17.97 o 
  -6  -7   1       90.07      138.77      8.51 o 
  -5  -7   1     2096.38     2028.50     52.49 o 
  -4  -7   1      425.61      394.76     85.43 o 
  -3  -7   1       21.09       38.27      4.68 o 
  -1  -7   1      937.69      802.07     27.90 o 
   0  -7   1        2.60        4.53      4.51 o 
   1  -7   1     3964.99     4057.44     83.14 o 
   2  -7   1      289.27      215.13      7.67 o 
   3  -7   1      315.17      358.48     19.44 o 
   4  -7   1      710.25      736.10     18.08 o 
   5  -7   1       45.58       50.43     13.88 o 
   6  -7   1     1496.88     1389.77     27.15 o 
   7  -7   1        8.62        3.71      9.12 o 
   8  -7   1      361.38      358.32     17.31 o 
 -11  -6   1      413.15      441.32     39.93 o 
 -10  -6   1       11.85       27.22     23.09 o 
  -9  -6   1      372.60      372.70     58.42 o 
  -8  -6   1      107.92      103.53      8.63 o 
  -7  -6   1     1004.42      819.11     58.79 o 
  -6  -6   1      214.26      179.72     19.75 o 
  -5  -6   1      204.20      185.08      9.75 o 
  -4  -6   1     3971.47     3829.40    214.16 o 
  -3  -6   1       17.08       18.02      4.55 o 
  -2  -6   1     2398.84     2551.63     72.34 o 
  -1  -6   1       81.98       22.14      9.99 o 
   0  -6   1     1448.62     1387.13     63.74 o 
   1  -6   1      531.53      577.93     18.89 o 
   2  -6   1      590.01      493.30     14.54 o 
   3  -6   1     2589.71     2435.39     58.96 o 
   4  -6   1        9.98       13.60      5.24 o 
   5  -6   1     2824.67     2946.71     54.89 o 
   6  -6   1      193.26      188.86      9.38 o 
   7  -6   1        0.19        6.48      8.99 o 
   8  -6   1       21.33       41.57     10.96 o 
   9  -6   1      374.04      392.55     18.18 o 
 -11  -5   1        6.76        4.91      9.30 o 
 -10  -5   1      154.21      120.51     14.51 o 
  -9  -5   1       19.28       44.45      9.07 o 
  -8  -5   1      829.53      820.50     75.88 o 
  -7  -5   1      676.58      676.68     65.10 o 
  -6  -5   1       88.97       85.83     15.93 o 
  -5  -5   1     2298.97     2238.80     63.41 o 
  -4  -5   1      240.83      165.08     38.57 o 
  -3  -5   1        0.43       12.77      5.29 o 
  -2  -5   1     1754.05     1706.32     57.41 o 
  -1  -5   1     7241.63     7177.88    429.08 o 
   0  -5   1      135.82      169.18      5.47 o 
   1  -5   1     1684.01     1840.97     59.57 o 
   2  -5   1     9425.26     9611.57    129.13 o 
   3  -5   1      199.58      260.77      8.26 o 
   4  -5   1        0.82        2.88      4.66 o 
   5  -5   1        6.55        5.67      5.25 o 
   6  -5   1     3070.29     3161.79    100.67 o 
   7  -5   1        5.20       10.49      6.20 o 
   8  -5   1     1321.40     1339.01     25.61 o 
   9  -5   1      254.40      233.99     16.32 o 
 -11  -4   1      371.59      378.95     23.94 o 
 -10  -4   1       10.89       -1.60     17.67 o 
  -9  -4   1      355.31      393.69     12.65 o 
  -8  -4   1     2255.31     2074.32     42.90 o 
  -7  -4   1       55.80       94.42      7.86 o 
  -6  -4   1       11.85       24.88      6.32 o 
  -5  -4   1      136.81      128.15      7.01 o 
  -4  -4   1     1209.68     1012.52     29.19 o 
  -3  -4   1     2348.57     2382.46    207.82 o 
  -2  -4   1     5331.79     4977.87     87.86 o 
  -1  -4   1     1530.03     1320.65     82.36 o 
   0  -4   1     5526.36     5408.01     87.53 o 
   1  -4   1       24.56       50.13      4.37 o 
   2  -4   1     2568.37     2798.64     73.39 o 
   3  -4   1     2396.35     2166.33     56.93 o 
   4  -4   1       76.08       92.90      9.58 o 
   5  -4   1     5379.37     4931.27     91.55 o 
   6  -4   1        1.86        1.50      7.74 o 
   7  -4   1      200.90      189.00      9.57 o 
   8  -4   1      245.92      196.49     13.36 o 
   9  -4   1       71.54       62.82     12.12 o 
  10  -4   1        5.76        3.51     10.99 o 
 -11  -3   1        1.01        0.38     15.82 o 
 -10  -3   1        3.95        0.97     14.83 o 
  -9  -3   1       75.74       42.20      6.70 o 
  -8  -3   1      832.39      801.60     19.28 o 
  -7  -3   1      638.64      629.87     18.35 o 
  -6  -3   1      768.25      880.79     38.77 o 
  -5  -3   1     2858.18     2383.86    176.99 o 
  -4  -3   1      667.21      496.75     25.44 o 
  -3  -3   1      448.51      438.50     60.19 o 
  -2  -3   1     1901.48     1579.26    240.25 o 
  -1  -3   1     9062.33     8615.26     95.68 o 
   0  -3   1      102.15      120.69      3.88 o 
   1  -3   1     1114.73      998.68     40.51 o 
   2  -3   1    19804.17    20190.79    174.61 o 
   4  -3   1      288.85      242.46     24.66 o 
   5  -3   1        0.01       -4.59      4.59 o 
   6  -3   1       85.26       67.77     10.74 o 
   7  -3   1       44.14       43.78      6.49 o 
   8  -3   1       78.10       83.67      6.94 o 
   9  -3   1      385.79      491.81     17.94 o 
  10  -3   1       33.33       29.59     13.25 o 
 -11  -2   1      287.31      289.90     52.86 o 
 -10  -2   1      104.01       79.94     16.10 o 
  -9  -2   1      131.85      106.88      7.64 o 
  -8  -2   1     1171.86     1238.94     33.90 o 
  -7  -2   1      127.57      565.13     72.64 o 
  -6  -2   1      261.14      215.49      8.61 o 
  -5  -2   1      515.39      459.21     14.22 o 
  -4  -2   1     4172.97     3755.98    168.50 o 
  -3  -2   1      333.83      241.21     21.89 o 
  -2  -2   1     1745.51     1690.49     45.02 o 
  -1  -2   1       74.14       66.20     10.37 o 
   0  -2   1      530.45      411.90     17.56 o 
   1  -2   1     5138.83     5847.15     74.31 o 
   2  -2   1     5197.04     5018.39     80.06 o 
   3  -2   1      895.52      906.37     24.34 o 
   4  -2   1      116.60       95.40     10.50 o 
   5  -2   1    14213.23    15115.46    175.56 o 
   6  -2   1        6.61       17.20      5.52 o 
   7  -2   1      304.65      345.91     10.56 o 
   8  -2   1       68.67       65.92      7.60 o 
   9  -2   1      633.13      564.36     19.02 o 
  10  -2   1        7.38       17.77     11.82 o 
 -11  -1   1       23.17       11.31     11.73 o 
 -10  -1   1        2.66       -4.82     12.12 o 
  -9  -1   1      178.76      182.52      8.85 o 
  -8  -1   1      181.24      184.42      9.06 o 
  -7  -1   1      201.39      241.89     26.43 o 
  -6  -1   1      142.48      162.36     16.95 o 
  -5  -1   1     1943.25     1501.19     40.68 o 
  -4  -1   1     1798.24     1908.17    117.96 o 
  -3  -1   1     1009.86     1286.25     36.28 o 
  -2  -1   1     1643.23     1704.03     45.04 o 
  -1  -1   1     8931.59     8159.48     68.36 o 
   0  -1   1     2339.04     2425.55     32.58 o 
   1  -1   1     7124.57     8029.88     72.27 o 
   2  -1   1    11572.79    11298.56    120.42 o 
   3  -1   1      190.26      247.45      7.39 o 
   4  -1   1     6675.78     6313.95    109.44 o 
   5  -1   1        9.45       34.01      4.98 o 
   6  -1   1        6.82       16.20      5.52 o 
   7  -1   1       78.15        5.87     11.22 o 
   8  -1   1      453.44      410.32     30.73 o 
   9  -1   1      356.07      388.73     32.91 o 
  10  -1   1       20.75       40.95     13.33 o 
  11  -1   1       76.15       71.14     25.24 o 
 -11   0   1       70.32       50.45     17.09 o 
 -10   0   1        0.28       -3.95      9.76 o 
  -9   0   1      373.24      386.95     11.01 o 
  -8   0   1     1004.56      994.57     31.66 o 
  -6   0   1     1660.97     1529.59     48.95 o 
  -5   0   1     1246.72     1537.70     37.33 o 
  -4   0   1       13.87       12.35      3.79 o 
  -3   0   1        1.89       11.66      4.50 o 
  -2   0   1     2375.80     3220.32     55.75 o 
  -1   0   1     2949.29     3170.45     72.20 o 
   1   0   1    11512.51    11343.53     75.89 o 
   2   0   1      487.82      647.19     17.93 o 
   3   0   1     3808.10     4150.11     77.63 o 
   4   0   1      122.22      124.86      5.74 o 
   5   0   1     3891.06     3836.20     85.43 o 
   6   0   1      389.67      356.65     29.91 o 
   7   0   1        2.49       -2.16      5.61 o 
   8   0   1      650.48      654.58     37.04 o 
   9   0   1       32.54       29.40      6.79 o 
  10   0   1        1.94       12.17     18.59 o 
  11   0   1       13.67        3.11     12.79 o 
 -11   1   1       64.31       76.01     12.84 o 
 -10   1   1       52.51       73.50     16.40 o 
  -9   1   1      164.81      160.79     19.10 o 
  -8   1   1      490.57      590.14     14.41 o 
  -7   1   1      652.45      572.56     15.01 o 
  -6   1   1       89.42       54.47      6.01 o 
  -5   1   1     3408.76     3874.05    111.31 o 
  -4   1   1      542.97      448.23     20.12 o 
  -3   1   1      513.78      724.68     20.82 o 
  -2   1   1     9602.87     9565.18     99.74 o 
  -1   1   1    12936.66    13553.28    170.00 o 
   0   1   1     1052.11      995.20     21.57 o 
   1   1   1     3458.78     3378.67     44.03 o 
   2   1   1    19609.75    19446.84    195.10 o 
   3   1   1       21.86       11.74      8.46 o 
   4   1   1      155.15      201.42      6.83 o 
   5   1   1      423.49      369.98     12.81 o 
   6   1   1       31.03       28.97      5.24 o 
   7   1   1        4.92       99.25     33.90 o 
   8   1   1      307.17      329.92     16.61 o 
   9   1   1      475.63      526.65     12.27 o 
  10   1   1      285.12      313.55     50.06 o 
  11   1   1      231.42      223.04     16.74 o 
 -10   2   1        5.75       29.21     12.06 o 
  -9   2   1      490.78      501.87     18.10 o 
  -8   2   1      367.40      416.23     15.41 o 
  -7   2   1      123.94      149.76     31.68 o 
  -6   2   1      395.42      296.01      9.42 o 
  -5   2   1       39.03       76.00     11.59 o 
  -4   2   1     1005.77      900.15     25.54 o 
  -3   2   1       89.85      109.27      8.66 o 
  -2   2   1    13536.90    13465.32    129.59 o 
  -1   2   1     1004.78     1219.66     50.98 o 
   0   2   1      316.58      345.51      9.38 o 
   1   2   1     9046.43     9127.90    149.88 o 
   2   2   1      110.54       96.37      6.24 o 
   3   2   1     1846.99     2106.20    128.77 o 
   4   2   1      333.36      215.57     13.16 o 
   5   2   1       27.73       25.65      9.69 o 
   6   2   1       69.33       73.21      6.64 o 
   7   2   1     2421.47     2336.84    105.24 o 
   8   2   1     1848.00     2012.10     44.59 o 
   9   2   1        1.69       -1.30      5.26 o 
  10   2   1      138.43      161.62     14.29 o 
  11   2   1       80.30       48.47     11.91 o 
 -10   3   1       11.93       29.63     10.90 o 
  -9   3   1      465.98      473.20     40.62 o 
  -8   3   1      264.69      256.40      9.55 o 
  -7   3   1      152.78      186.88      9.38 o 
  -6   3   1      145.61      136.17     11.63 o 
  -5   3   1     1067.67     1041.36     27.00 o 
  -4   3   1      257.97      337.03     25.47 o 
  -3   3   1     7534.95     7211.39    227.81 o 
  -2   3   1     4950.81     5091.50    100.40 o 
  -1   3   1     1500.21     1460.98     69.88 o 
   0   3   1       29.35        3.55      3.96 o 
   1   3   1     4194.19     3929.76     63.40 o 
   2   3   1      950.10     1382.17     37.22 o 
   3   3   1        3.27        3.05      2.87 o 
   4   3   1      155.23      138.91     23.53 o 
   5   3   1      410.41      419.21     61.42 o 
   6   3   1      513.62      589.49     16.13 o 
   8   3   1     2222.64     2274.91     47.91 o 
   9   3   1        2.39       -1.56      6.44 o 
  10   3   1       12.00        2.89     11.38 o 
  11   3   1      522.75      492.60     20.35 o 
 -10   4   1       28.79       41.30     14.33 o 
  -9   4   1      214.03      199.90     23.26 o 
  -8   4   1      428.59      388.34     15.33 o 
  -7   4   1        0.08       -0.17      6.10 o 
  -6   4   1     2022.33     2031.89    101.08 o 
  -5   4   1      182.49      183.84      8.52 o 
  -4   4   1     1748.65     1610.50     52.65 o 
  -3   4   1       85.41      291.78     13.85 o 
  -2   4   1     7762.28     7858.27    118.00 o 
  -1   4   1      374.88      300.51      8.23 o 
   0   4   1     3199.43     3099.49     66.75 o 
   1   4   1     1495.42     1128.22     40.21 o 
   2   4   1      674.45      662.72     73.15 o 
   3   4   1     2433.57     2214.52    105.14 o 
   4   4   1        2.00        6.83      4.26 o 
   5   4   1    14568.95    11517.17    537.01 o 
   6   4   1      370.00      316.71     18.65 o 
   7   4   1      356.32      385.06     21.14 o 
   8   4   1     2734.52     2664.83     50.66 o 
   9   4   1       84.95      123.89     14.43 o 
  10   4   1      113.15      139.82     14.27 o 
  11   4   1        0.36      -10.68     10.68 o 
  -9   5   1      394.23      448.36     19.02 o 
  -8   5   1       98.60      115.73     13.12 o 
  -7   5   1       38.19       55.91     16.54 o 
  -6   5   1      109.55       84.01      7.00 o 
  -5   5   1     2760.77     2756.48     56.85 o 
  -4   5   1      191.64      237.50      8.38 o 
  -3   5   1     2836.74     2675.14     70.69 o 
  -2   5   1     8790.46     8619.25    154.18 o 
  -1   5   1     1448.15     1439.45     36.82 o 
   0   5   1      385.24      424.79     12.59 o 
   1   5   1     1718.32     1889.36    111.14 o 
   2   5   1     5384.58     5362.96    528.35 o 
   3   5   1       41.23       32.87      4.34 o 
   4   5   1    12923.50    12837.59    382.97 o 
   5   5   1      802.30      684.26     26.87 o 
   6   5   1       38.27       56.81     13.37 o 
   7   5   1      341.76      452.96     21.21 o 
   8   5   1      458.66      462.55     23.74 o 
   9   5   1       92.12       58.61      7.41 o 
  10   5   1       47.97       49.46     23.29 o 
  11   5   1      348.26      376.48     18.06 o 
  -9   6   1       41.84       42.21     13.12 o 
  -8   6   1      110.14      128.23     21.59 o 
  -7   6   1        0.94       10.42      9.43 o 
  -6   6   1     2879.97     2721.74     68.24 o 
  -5   6   1      508.57      503.41     23.97 o 
  -4   6   1       11.70       23.47      5.47 o 
  -3   6   1      241.60      260.66      9.28 o 
  -2   6   1      523.00      481.81     13.16 o 
  -1   6   1        1.99        5.61      3.49 o 
   0   6   1     1039.19      997.31     26.76 o 
   1   6   1       49.39       16.12      3.69 o 
   2   6   1      128.64      257.39     25.10 o 
   3   6   1      899.72      915.65     27.11 o 
   4   6   1       10.41        4.31      4.13 o 
   5   6   1     1333.32     1183.03     60.23 o 
   6   6   1        0.98       -4.76      5.93 o 
   7   6   1      551.70      390.75     26.77 o 
   8   6   1      884.31      820.96     91.87 o 
   9   6   1       52.91       57.97     12.31 o 
  10   6   1       92.19      118.76     14.06 o 
  11   6   1        6.14        5.32     10.90 o 
  -8   7   1       11.59        8.65     12.14 o 
  -7   7   1        1.36        5.42     20.56 o 
  -6   7   1       76.31       70.54      9.60 o 
  -5   7   1      385.10      371.50     10.72 o 
  -4   7   1      139.08      120.25      9.14 o 
  -3   7   1     1233.39     1332.43     39.54 o 
  -2   7   1      103.72      124.68      6.39 o 
  -1   7   1     2749.00     3036.43     75.67 o 
   0   7   1      127.14      107.52      5.49 o 
   1   7   1       40.98       48.11      4.81 o 
   2   7   1     1682.22     1429.73     94.74 o 
   3   7   1       68.79       46.02      8.22 o 
   4   7   1     8313.76     7595.26    474.81 o 
   5   7   1     1183.83     1142.71     83.79 o 
   6   7   1      155.17      177.20     13.68 o 
   7   7   1     1972.90     1833.22     41.16 o 
   8   7   1       42.17       51.07      7.15 o 
   9   7   1       15.98       36.85     11.56 o 
  10   7   1       11.40       33.29     12.84 o 
  11   7   1      474.73      510.20     51.80 o 
  -7   8   1       24.54       27.88     11.88 o 
  -6   8   1     1451.15     1438.76     26.51 o 
  -5   8   1       13.36       19.78      5.90 o 
  -4   8   1       14.11       34.10      5.80 o 
  -3   8   1      175.98      175.17      9.79 o 
  -2   8   1     1017.48      970.64     26.98 o 
  -1   8   1       18.54       10.90      7.64 o 
   0   8   1       78.50       92.91      6.32 o 
   1   8   1     7495.99     7194.79    102.85 o 
   2   8   1       16.73       -5.56      5.56 o 
   3   8   1     1590.57     1734.00     50.28 o 
   4   8   1      432.10      361.50     11.37 o 
   5   8   1     2910.93     2760.42     57.32 o 
   6   8   1       23.59       35.61      7.74 o 
   7   8   1      325.24      305.10     10.49 o 
   8   8   1      409.71      428.13     60.53 o 
   9   8   1        7.99      -11.94     11.94 o 
  10   8   1      105.72       99.11     20.29 o 
  11   8   1        0.40        6.19     11.55 o 
  -7   9   1      169.45      177.81     15.41 o 
  -6   9   1        9.78       -6.06      9.88 o 
  -5   9   1      561.09      560.84     17.36 o 
  -4   9   1      195.77      186.58     10.33 o 
  -3   9   1       32.59       36.99      5.61 o 
  -2   9   1      211.35      274.52      8.83 o 
  -1   9   1        1.55       20.67      5.11 o 
   0   9   1     1346.60     1355.72     38.80 o 
   1   9   1      569.87      574.31     31.24 o 
   2   9   1      851.26      982.05     22.57 o 
   3   9   1      138.01       84.84      6.66 o 
   4   9   1     3361.97     3604.10    123.08 o 
   5   9   1      179.27      149.73     25.27 o 
   6   9   1      329.39      283.97     15.65 o 
   7   9   1      472.33      303.66     73.42 o 
   8   9   1        1.42       18.37      5.14 o 
   9   9   1       42.50       35.56     12.18 o 
  10   9   1        0.09        5.57     16.68 o 
  -6  10   1      203.09      201.08     14.75 o 
  -5  10   1        5.16       -1.03     13.06 o 
  -4  10   1        5.24        2.47     21.35 o 
  -3  10   1      653.75      663.85     33.49 o 
  -2  10   1      157.17      133.02     18.72 o 
  -1  10   1      150.60      212.80     17.63 o 
   0  10   1      332.72      323.38     12.75 o 
   1  10   1     5378.01     5199.58     66.65 o 
   2  10   1       13.19        2.01      5.35 o 
   3  10   1       94.97      123.94      7.26 o 
   4  10   1      265.04      281.96     21.14 o 
   5  10   1       33.13       34.41      6.32 o 
   6  10   1       21.30       30.47      6.28 o 
   7  10   1      151.90      150.35      8.05 o 
   8  10   1      197.78      185.55     37.17 o 
   9  10   1       18.89        9.20     11.78 o 
  10  10   1      307.22      277.04     19.29 o 
  -5  11   1       60.56       57.79     11.38 o 
  -4  11   1       13.30        5.27     12.69 o 
  -3  11   1      755.17      755.21     19.31 o 
  -2  11   1      860.19      818.14     18.86 o 
  -1  11   1        5.36        5.32      6.62 o 
   0  11   1     1404.06     1532.57     29.41 o 
   1  11   1        3.89        3.39      4.51 o 
   2  11   1     2148.04     2255.75     37.94 o 
   3  11   1       69.84       57.58     11.77 o 
   4  11   1       80.90       66.14     11.05 o 
   5  11   1      167.35      184.70     14.94 o 
   6  11   1      372.44      356.64     34.34 o 
   7  11   1      219.14      215.95     15.76 o 
   8  11   1        8.86       12.84     16.81 o 
   9  11   1        0.58       -5.10     11.23 o 
  -4  12   1       32.41       46.96     12.38 o 
  -3  12   1      377.34      446.68     17.44 o 
  -2  12   1      250.86      261.86     13.50 o 
  -1  12   1       31.37       39.62     29.26 o 
   0  12   1       95.38       95.67      9.81 o 
   1  12   1       78.95       56.19      9.86 o 
   2  12   1        6.99        8.59      4.91 o 
   3  12   1      371.51      392.20     14.12 o 
   4  12   1       64.68       98.86      6.44 o 
   5  12   1       11.88        5.26      7.75 o 
   6  12   1      137.16      164.98     30.15 o 
   7  12   1      257.60      237.54     17.43 o 
   8  12   1      203.48      220.38     17.19 o 
   9  12   1       37.24       70.35     11.53 o 
  -3  13   1      219.31      230.44     17.70 o 
  -2  13   1      239.51      220.35     13.79 o 
  -1  13   1       17.07       23.31     10.56 o 
   0  13   1      818.69      828.66     21.22 o 
   1  13   1        0.01       28.77     11.53 o 
   2  13   1       61.45       27.45     20.84 o 
   3  13   1       50.67       45.53     11.02 o 
   4  13   1      601.95      545.94     27.15 o 
   5  13   1       38.18       43.17      9.75 o 
   6  13   1       46.44       31.83     11.98 o 
   7  13   1      467.84      509.88     20.26 o 
   8  13   1       20.66       18.42     13.75 o 
  -1  14   1        4.94       -7.65      8.79 o 
   0  14   1        9.80        5.70      9.12 o 
   1  14   1      276.06      242.64     17.36 o 
   2  14   1        1.48       -3.83      8.73 o 
   3  14   1      232.85      190.66     23.77 o 
   4  14   1       72.32       69.68     11.02 o 
   5  14   1       18.64       37.35     11.76 o 
   6  14   1       63.58      101.72     13.61 o 
  -6 -14   2      203.71      229.25     27.21 o 
  -5 -14   2        2.40        0.89     12.07 o 
  -4 -14   2        1.94       18.31     11.23 o 
  -3 -14   2       10.01        5.28      8.97 o 
  -2 -14   2      482.23      426.25     29.36 o 
  -1 -14   2       20.15       23.93      9.50 o 
   0 -14   2       31.09       23.09      9.23 o 
   1 -14   2      129.25      113.25     12.71 o 
  -7 -13   2       11.43       23.91     14.56 o 
  -6 -13   2        0.22       11.47     10.34 o 
  -5 -13   2      593.20      552.84     42.63 o 
  -4 -13   2       22.69       24.50      9.35 o 
  -3 -13   2      506.65      573.44     57.74 o 
  -2 -13   2       69.87       50.46      9.19 o 
  -1 -13   2      258.82      298.97     54.46 o 
   0 -13   2      158.90      164.76     15.04 o 
   1 -13   2       89.93       69.78     10.81 o 
   2 -13   2      109.32      118.43     12.73 o 
   3 -13   2       11.25        5.35     14.05 o 
  -8 -12   2      150.51      149.18     13.86 o 
  -7 -12   2       17.14       31.91     12.39 o 
  -6 -12   2     1261.22     1222.25     68.75 o 
  -5 -12   2        2.98        8.57      8.69 o 
  -4 -12   2        3.07       -1.78      9.09 o 
  -3 -12   2      489.11      457.71     18.65 o 
  -2 -12   2      767.06      754.12     20.57 o 
  -1 -12   2      101.27       98.80     11.46 o 
   0 -12   2        0.87       -7.39      7.39 o 
   1 -12   2      603.14      682.81     31.20 o 
   2 -12   2        0.87        0.81      9.10 o 
   3 -12   2      203.28      183.09     12.92 o 
   4 -12   2       19.20       19.44     11.39 o 
  -9 -11   2      285.54      325.29     40.58 o 
  -8 -11   2        0.76       -0.61      9.31 o 
  -7 -11   2       95.68       77.34     27.45 o 
  -6 -11   2        7.36        2.68      9.49 o 
  -5 -11   2     1106.98      995.33     23.77 o 
  -4 -11   2        3.28        2.80      9.11 o 
  -3 -11   2      748.06      830.79     25.02 o 
  -2 -11   2      213.90      191.78      8.46 o 
  -1 -11   2       37.11       27.58     17.67 o 
   0 -11   2        5.38       24.51      5.37 o 
   1 -11   2       52.23       58.13     11.70 o 
   2 -11   2      309.70      321.77     18.48 o 
   3 -11   2        1.05       -6.67      8.96 o 
   4 -11   2      645.95      624.28     19.62 o 
   5 -11   2       49.75       88.43     11.53 o 
 -10 -10   2       34.77       38.50     12.18 o 
  -9 -10   2       30.31      105.17     16.98 o 
  -8 -10   2      197.78      203.04     13.65 o 
  -7 -10   2       27.74       24.04     10.13 o 
  -6 -10   2     1068.59     1197.36     54.56 o 
  -5 -10   2      522.44      530.63     22.47 o 
  -4 -10   2        1.87       15.67      5.52 o 
  -3 -10   2       35.20       59.77      6.68 o 
  -2 -10   2      435.03      425.22     18.82 o 
  -1 -10   2        5.05       16.92      9.14 o 
   0 -10   2      195.94      227.77      8.80 o 
   1 -10   2      538.63      541.37     13.09 o 
   2 -10   2      230.12      240.76      9.04 o 
   3 -10   2      221.29      223.46     29.09 o 
   4 -10   2       96.66      105.60     12.22 o 
   5 -10   2      262.94      292.76     24.72 o 
   6 -10   2       32.82       20.01     12.38 o 
 -10  -9   2       18.24        0.15     18.76 o 
  -9  -9   2      837.31      920.00     24.20 o 
  -8  -9   2        0.74       -8.09     11.28 o 
  -7  -9   2      808.24      695.09     16.63 o 
  -6  -9   2       53.28       55.86     16.81 o 
  -5  -9   2      605.42      512.68     15.45 o 
  -4  -9   2       88.06      126.59     10.98 o 
  -3  -9   2       18.41        5.23      4.93 o 
  -2  -9   2     1844.92     1732.71     43.98 o 
  -1  -9   2      557.19      513.53     40.38 o 
   0  -9   2     3302.84     3266.56     57.05 o 
   1  -9   2       28.87       60.08      8.32 o 
   2  -9   2      234.64      256.50      8.66 o 
   3  -9   2        4.07        9.76      5.39 o 
   4  -9   2     1396.75     1411.89     26.21 o 
   5  -9   2      291.39      310.92     28.82 o 
   6  -9   2        3.62       10.79     11.37 o 
   7  -9   2       58.06       40.08     11.68 o 
 -10  -8   2      248.83      219.85     15.75 o 
  -9  -8   2      137.83      194.42     14.12 o 
  -8  -8   2      870.23      753.64     45.22 o 
  -7  -8   2       58.62       -4.76      8.22 o 
  -6  -8   2     1849.37     2064.65     44.15 o 
  -5  -8   2       33.20       14.42      6.78 o 
  -4  -8   2      508.87      458.81     34.92 o 
  -3  -8   2      156.70      113.59      6.66 o 
  -2  -8   2     1193.25     1030.23     26.11 o 
  -1  -8   2       16.20       20.36      4.53 o 
   0  -8   2      713.41      619.53     16.57 o 
   1  -8   2     2192.75     2346.83     59.27 o 
   2  -8   2      231.19      189.89      7.79 o 
   3  -8   2       11.52        2.35      6.12 o 
   4  -8   2      303.82      303.47     10.21 o 
   5  -8   2      377.47      380.96     10.18 o 
   6  -8   2       17.15       24.18      9.64 o 
   7  -8   2       31.58       26.05     11.03 o 
   8  -8   2       67.65       81.93     13.22 o 
 -11  -7   2       20.70       17.78     11.30 o 
 -10  -7   2      283.34      303.20     66.50 o 
  -9  -7   2      378.97      385.67     27.59 o 
  -8  -7   2       21.13       25.00      6.30 o 
  -7  -7   2       50.02       47.94      7.20 o 
  -6  -7   2      120.48      129.99     18.52 o 
  -5  -7   2        3.44        4.58      4.68 o 
  -4  -7   2       55.55       29.66     13.91 o 
  -3  -7   2      837.41      607.05     19.98 o 
  -2  -7   2      845.63      954.18     27.12 o 
  -1  -7   2     1136.96     1218.93     35.84 o 
   0  -7   2     1425.30     1465.63     48.62 o 
   1  -7   2      900.87      918.04     20.25 o 
   2  -7   2     2862.42     3019.14     62.17 o 
   3  -7   2       12.84      123.88      8.73 o 
   4  -7   2      206.52      245.69     15.96 o 
   5  -7   2       36.95       47.06      6.07 o 
   6  -7   2      302.69      319.66     35.40 o 
   7  -7   2      461.00      438.44     16.44 o 
   8  -7   2       35.88       90.03     15.69 o 
 -11  -6   2       26.40       48.57     30.32 o 
 -10  -6   2      318.51      285.05     22.41 o 
  -9  -6   2      217.23      195.82     14.14 o 
  -8  -6   2       20.80       10.31      5.75 o 
  -7  -6   2      139.35      102.14     13.30 o 
  -6  -6   2     1080.40      997.55     44.40 o 
  -5  -6   2      895.79      916.50     25.63 o 
  -4  -6   2     1605.32     1535.95     52.11 o 
  -3  -6   2     4541.05     5220.66     94.11 o 
  -2  -6   2     1503.77     1426.18     77.72 o 
  -1  -6   2        2.25       -3.63      4.70 o 
   0  -6   2      256.17      289.69     17.39 o 
   1  -6   2     1652.37     1632.67     54.10 o 
   2  -6   2      414.84      384.17     10.43 o 
   3  -6   2      636.05      629.60     17.57 o 
   4  -6   2       67.92       70.75      9.17 o 
   5  -6   2      102.02       99.06      7.09 o 
   6  -6   2      944.46      964.84     28.48 o 
   7  -6   2      250.79      256.46     13.45 o 
   8  -6   2      127.00      147.64     13.35 o 
   9  -6   2        4.91       13.55     24.18 o 
 -11  -5   2        0.30       -1.02      9.43 o 
 -10  -5   2      254.05      318.11     19.03 o 
  -9  -5   2      262.40      470.71     45.90 o 
  -8  -5   2       70.94       60.53      8.01 o 
  -7  -5   2      789.00      634.05     31.20 o 
  -6  -5   2       23.64       33.59      5.37 o 
  -5  -5   2        5.88       22.15      4.59 o 
  -4  -5   2     1012.61      865.87     61.62 o 
  -3  -5   2     4941.64     5349.36    157.15 o 
  -2  -5   2     4117.49     3747.37     83.99 o 
  -1  -5   2      398.43      398.43     24.08 o 
   0  -5   2       71.59      134.11      5.40 o 
   1  -5   2     1518.04     1769.91     46.43 o 
   2  -5   2       11.34       76.54     13.50 o 
   3  -5   2       82.79      341.59     23.50 o 
   4  -5   2     2586.05     2614.02     60.11 o 
   5  -5   2      137.84      139.88     12.38 o 
   6  -5   2       78.49       89.01      7.49 o 
   7  -5   2     1092.81     1104.90     25.53 o 
   8  -5   2        0.47      147.96     13.29 o 
   9  -5   2        2.25        1.15     10.42 o 
 -11  -4   2        5.63       12.53      9.44 o 
 -10  -4   2       41.14       28.49     12.16 o 
  -9  -4   2       84.77       83.81      7.17 o 
  -8  -4   2      494.30      592.91     29.74 o 
  -7  -4   2       33.62       47.73      6.65 o 
  -6  -4   2     3627.42     3400.77     71.61 o 
  -5  -4   2        0.89       12.89      4.48 o 
  -4  -4   2      566.77      551.26     27.55 o 
  -3  -4   2    16553.39    15742.56    514.58 o 
  -2  -4   2     1326.80     1997.32     59.37 o 
  -1  -4   2        5.73        5.00      2.59 o 
   0  -4   2       95.90      130.28      4.83 o 
   1  -4   2     8303.31     8164.59    116.23 o 
   2  -4   2     2191.42     2383.72     66.45 o 
   3  -4   2     3771.49     4114.38    134.16 o 
   4  -4   2      256.22      236.70      8.22 o 
   5  -4   2        1.73        8.04      7.78 o 
   6  -4   2       20.11       55.18      7.64 o 
   7  -4   2      300.99      369.14     10.94 o 
   8  -4   2      411.54      438.74     16.48 o 
   9  -4   2        4.09        7.31     10.63 o 
  10  -4   2       80.42      156.49     19.85 o 
 -11  -3   2       66.10       51.64     11.25 o 
 -10  -3   2      214.90      214.55     14.53 o 
  -9  -3   2      203.27      176.42     31.72 o 
  -8  -3   2       35.50       27.37      7.23 o 
  -7  -3   2     3134.76     3303.17     95.96 o 
  -6  -3   2     2215.50     1937.98     90.58 o 
  -5  -3   2       11.23       -4.53      4.53 o 
  -4  -3   2     5372.08     5773.16    218.60 o 
  -3  -3   2     4287.26     4330.31    193.64 o 
  -2  -3   2     2405.38     2375.03    121.99 o 
  -1  -3   2       44.45       22.53      9.38 o 
   0  -3   2     3044.74     2654.85     56.95 o 
   1  -3   2        8.33        7.87      4.23 o 
   2  -3   2       17.84       35.93      3.71 o 
   3  -3   2     4995.54     4971.02     99.94 o 
   4  -3   2     6181.77     6590.33    232.24 o 
   5  -3   2        6.06        4.90      6.27 o 
   6  -3   2      685.16      632.86     17.29 o 
   7  -3   2      417.66      521.29     12.78 o 
   8  -3   2       40.94       31.76      6.15 o 
   9  -3   2      473.36      424.76     18.43 o 
  10  -3   2       13.47        0.71     10.83 o 
 -11  -2   2        2.14        7.74      9.62 o 
 -10  -2   2      435.55      422.03     73.32 o 
  -9  -2   2      227.19      175.27      8.41 o 
  -8  -2   2        0.31       13.30      6.27 o 
  -7  -2   2      315.03      259.91     23.56 o 
  -6  -2   2     2235.69     2085.51     57.04 o 
  -5  -2   2       19.31       36.31      6.31 o 
  -4  -2   2       45.53       42.88      4.99 o 
  -3  -2   2     3645.06     3354.00     73.46 o 
  -2  -2   2     5533.66     6356.88    121.27 o 
  -1  -2   2    46149.20    46386.25    203.74 o 
   0  -2   2      100.43      167.84      5.04 o 
   1  -2   2     8588.97     9141.51     96.01 o 
   2  -2   2     2211.16     2269.59     57.77 o 
   3  -2   2     4927.72     4764.90     92.72 o 
   4  -2   2     4485.90     4743.93     93.49 o 
   5  -2   2      610.14      679.74     21.76 o 
   6  -2   2     1257.54     1128.64     27.71 o 
   7  -2   2       18.22        9.74     16.40 o 
   8  -2   2      151.93      212.51      9.48 o 
   9  -2   2       17.76       29.48     11.45 o 
  10  -2   2      356.42      406.34     18.21 o 
 -11  -1   2       91.37       56.69     13.25 o 
 -10  -1   2      186.41      219.19     30.18 o 
  -9  -1   2      473.63      492.35     12.70 o 
  -8  -1   2      251.62      264.97     10.20 o 
  -7  -1   2     3027.73     2653.17     58.97 o 
  -6  -1   2     1001.32     1058.13     82.77 o 
  -5  -1   2       84.91       68.02     13.91 o 
  -4  -1   2      163.72       93.01      5.56 o 
  -3  -1   2     3771.22     3686.88     77.08 o 
  -2  -1   2      296.51      556.06     16.37 o 
  -1  -1   2       75.74       58.30      2.55 o 
   1  -1   2       12.50       -0.98      1.80 o 
   2  -1   2     5774.04     5573.30    138.39 o 
   3  -1   2     7172.16     7200.21    224.60 o 
   4  -1   2    10968.23    10462.18    158.82 o 
   5  -1   2     1508.57     2312.00     63.48 o 
   6  -1   2      215.50      237.77      8.97 o 
   7  -1   2     1665.95     1629.00     74.41 o 
   8  -1   2       12.43       -1.28      6.39 o 
   9  -1   2       83.89       78.45     11.12 o 
  10  -1   2       55.13       50.85     11.36 o 
  11  -1   2      132.66       96.28     15.99 o 
 -11   0   2        1.81        7.15     12.52 o 
 -10   0   2      413.81      422.33     18.92 o 
  -9   0   2      230.27      248.95     18.11 o 
  -8   0   2        5.60       15.74      5.83 o 
  -7   0   2      155.64       69.87      9.27 o 
  -6   0   2     3375.20     3344.96     98.35 o 
  -5   0   2      404.99      453.49     81.47 o 
  -4   0   2       64.76       52.54      9.45 o 
  -3   0   2     8340.15     7832.77    147.49 o 
  -2   0   2      927.53     1107.93     50.51 o 
  -1   0   2     7839.90     7509.55     74.13 o 
   0   0   2     3198.14     3537.45     48.70 o 
   1   0   2     1525.68     1365.33     32.13 o 
   2   0   2      670.37      756.84     63.60 o 
   3   0   2    13125.86    12986.29    140.66 o 
   4   0   2       43.84       42.72      4.64 o 
   5   0   2      513.55      634.43     19.95 o 
   6   0   2     1312.48     1165.73     57.87 o 
   7   0   2       54.48       57.26     11.15 o 
   8   0   2      107.21       81.45      7.19 o 
   9   0   2        3.34       21.48      5.55 o 
  10   0   2      436.69      482.62     19.09 o 
  11   0   2       46.27       38.27     19.27 o 
 -10   1   2        3.12       29.88     15.41 o 
  -9   1   2      304.67      300.04     28.03 o 
  -8   1   2       38.91       13.38     10.54 o 
  -7   1   2     1799.94     1794.92    107.08 o 
  -6   1   2      397.68      448.02     13.56 o 
  -5   1   2      430.79      461.87     37.58 o 
  -4   1   2     7144.56     7049.94    293.52 o 
  -3   1   2     1817.10     1699.21    147.97 o 
  -2   1   2       53.14       76.52      9.48 o 
  -1   1   2      878.63     1056.39     74.65 o 
   0   1   2    14321.13    11971.74    130.41 o 
   1   1   2     1344.37     1364.54     31.90 o 
   2   1   2      445.19      597.70     16.78 o 
   3   1   2     1121.00      794.79     37.79 o 
   4   1   2     1492.52     1025.02     41.95 o 
   5   1   2     1037.24     1175.18     50.57 o 
   6   1   2        2.08        3.54      5.06 o 
   7   1   2      978.23      909.28     47.16 o 
   8   1   2        2.41       -0.92      5.73 o 
   9   1   2      492.49      445.97     12.10 o 
  10   1   2      182.04      235.61     32.91 o 
  11   1   2       19.37       14.07     16.20 o 
 -10   2   2      417.63      464.61     19.83 o 
  -9   2   2        0.04      -11.19     11.19 o 
  -8   2   2      288.29      272.51     13.33 o 
  -7   2   2       47.02       37.02     15.52 o 
  -6   2   2     1129.65     1085.75     41.81 o 
  -5   2   2        4.18       31.00      6.85 o 
  -4   2   2     4179.17     4174.36     87.21 o 
  -3   2   2     2233.17     2012.19     61.54 o 
  -2   2   2       66.74       53.40      3.49 o 
  -1   2   2     9977.72    10330.76    137.43 o 
   0   2   2     1529.94     1677.14     44.78 o 
   1   2   2    39608.08    41117.86    617.60 o 
   3   2   2       79.08       39.11      6.62 o 
   4   2   2       41.71       13.45      3.89 o 
   5   2   2      288.23      368.90     13.13 o 
   6   2   2      251.44      211.37      8.42 o 
   7   2   2      249.09      424.99     36.66 o 
   8   2   2       11.15        8.19      6.55 o 
   9   2   2        9.46       17.09      8.29 o 
  10   2   2      777.67      902.88     26.11 o 
  11   2   2        9.60       -1.61     12.78 o 
 -10   3   2       41.42       26.33     19.17 o 
  -9   3   2      302.89      309.07     22.51 o 
  -8   3   2        1.91       -6.10      6.10 o 
  -7   3   2      521.81      560.76     13.52 o 
  -6   3   2       30.72       39.27      5.58 o 
  -5   3   2      166.67      118.88      6.82 o 
  -4   3   2     3984.74     3985.61     80.80 o 
  -3   3   2        5.07       -5.38     10.44 o 
  -2   3   2     1608.39     1466.80     35.71 o 
  -1   3   2       50.61       58.70      3.34 o 
   0   3   2     1498.78     1232.82     39.59 o 
   1   3   2      483.20      563.30     15.36 o 
   2   3   2     3499.09     3397.33     71.12 o 
   3   3   2     3463.82     3221.33     75.26 o 
   4   3   2     1629.52     1548.58     40.20 o 
   5   3   2      166.46      227.92     25.44 o 
   6   3   2      937.16      810.79     65.78 o 
   7   3   2     7587.32     7027.59     93.39 o 
   8   3   2        1.49       -7.64      7.64 o 
   9   3   2     1062.45     1103.56     29.29 o 
  10   3   2      186.78      216.76     14.52 o 
  11   3   2       34.50       40.74     12.13 o 
  -9   4   2        2.09       -8.58     10.74 o 
  -8   4   2      581.94      630.05     19.16 o 
  -7   4   2        7.02       10.94      5.86 o 
  -6   4   2        3.97       12.80      5.99 o 
  -5   4   2      988.64      981.16     25.50 o 
  -4   4   2     2090.01     2089.44     56.96 o 
  -3   4   2     2315.53     2448.88     69.21 o 
  -2   4   2     1022.08     1309.43     31.82 o 
  -1   4   2    16818.87    16632.21    168.26 o 
   0   4   2     2923.43     3130.67    117.72 o 
   1   4   2        6.16        3.21      3.55 o 
   3   4   2     2486.23     2638.67    112.37 o 
   4   4   2       18.98       22.30      6.04 o 
   5   4   2      342.23      249.08     32.23 o 
   6   4   2     7706.88     7322.98    483.64 o 
   7   4   2       41.16       91.50      8.37 o 
   8   4   2      199.20      191.58     15.18 o 
   9   4   2       45.76       39.80      6.84 o 
  10   4   2       47.44       65.95     12.86 o 
  11   4   2        0.11      -13.32     13.32 o 
  -9   5   2        2.51       -4.44     14.87 o 
  -8   5   2       87.51      135.16     13.77 o 
  -7   5   2     1390.45     1394.55     26.81 o 
  -6   5   2      154.58      172.80     11.83 o 
  -5   5   2      192.22      157.10      8.42 o 
  -4   5   2     3126.92     3043.68    173.65 o 
  -3   5   2       70.71      235.29     28.61 o 
  -2   5   2      292.47      411.98     10.83 o 
  -1   5   2       66.33      152.80      5.67 o 
   0   5   2     1071.24     1433.75     36.48 o 
   1   5   2       16.63       24.13      3.64 o 
   2   5   2       99.64      220.21      8.01 o 
   3   5   2     5301.29     5496.33     99.23 o 
   4   5   2      166.33       93.49      8.42 o 
   5   5   2      110.63      120.35     11.02 o 
   6   5   2      127.46      164.38     15.35 o 
   7   5   2     1443.64     1477.66     45.04 o 
   8   5   2        1.08       11.91      6.08 o 
   9   5   2      824.62      858.44     75.64 o 
  10   5   2      111.16      121.13     12.78 o 
  11   5   2        0.01       -9.95      9.95 o 
  -9   6   2        0.07       -8.41     10.70 o 
  -8   6   2      298.65      293.68     15.59 o 
  -7   6   2      348.75      376.78     16.69 o 
  -6   6   2       53.34       54.42      6.65 o 
  -5   6   2       13.84       16.28      5.72 o 
  -4   6   2      196.02      208.70      8.15 o 
  -3   6   2     1153.28     1315.11     43.12 o 
  -2   6   2       27.77       35.60      4.97 o 
  -1   6   2      936.25      830.61     19.72 o 
   0   6   2       35.86       29.70      4.12 o 
   1   6   2        7.50        4.60      7.74 o 
   2   6   2     1659.03     1807.25    241.82 o 
   3   6   2     5573.02     6280.37    182.07 o 
   4   6   2      603.40      721.33     43.86 o 
   5   6   2      489.63      523.47     16.29 o 
   6   6   2     4408.44     3859.23    283.80 o 
   7   6   2        1.55       57.19     19.06 o 
   8   6   2      319.98      340.02     49.31 o 
   9   6   2       96.40      100.08     10.50 o 
  10   6   2      230.57      246.61     29.12 o 
  11   6   2        5.22       16.05     13.96 o 
  -8   7   2       34.11       30.32     13.20 o 
  -7   7   2      362.19      374.29     37.85 o 
  -6   7   2      277.75      247.20      8.61 o 
  -5   7   2      339.32      397.44     13.27 o 
  -4   7   2      289.44      329.69      9.90 o 
  -3   7   2       32.95      106.41      7.70 o 
  -2   7   2     3493.02     3574.50    146.10 o 
  -1   7   2      754.66      783.33     37.31 o 
   0   7   2     1408.99     1346.75     46.69 o 
   1   7   2     3319.58     3444.60     74.94 o 
   2   7   2     3556.84     3377.19     99.44 o 
   3   7   2     2335.15     2146.81     58.88 o 
   4   7   2      883.66      737.91     37.99 o 
   5   7   2     2386.03     2385.78     61.69 o 
   6   7   2       40.95       45.54      6.54 o 
   7   7   2       12.94      188.32     61.90 o 
   8   7   2       42.10       57.87      7.32 o 
   9   7   2      191.19      200.89     14.19 o 
  10   7   2      105.06      130.81     13.77 o 
  11   7   2        7.93       -4.18     12.48 o 
  -7   8   2       26.21       10.78     10.69 o 
  -6   8   2       10.57        9.83     10.38 o 
  -5   8   2      315.90      333.59     14.25 o 
  -4   8   2      652.35      685.44     15.22 o 
  -3   8   2       25.97       34.94      6.01 o 
  -2   8   2      165.84      189.84     15.01 o 
  -1   8   2     2312.55     2269.29     56.45 o 
   0   8   2       84.48       88.14      6.09 o 
   1   8   2       85.04       70.89     21.31 o 
   2   8   2     2809.94     2910.45     65.67 o 
   3   8   2      791.26      774.24     60.98 o 
   4   8   2       94.52      122.80     21.83 o 
   5   8   2       16.77       21.22      5.90 o 
   6   8   2     3191.45     2922.03    105.58 o 
   7   8   2        0.74       -5.85      5.85 o 
   8   8   2      361.17      332.33     11.04 o 
   9   8   2      184.36      227.39     24.96 o 
  10   8   2      143.07      150.01     14.48 o 
  11   8   2       19.45       38.84     25.78 o 
  -7   9   2       82.29       62.13     13.69 o 
  -6   9   2        0.42        0.34      8.26 o 
  -5   9   2      192.49      192.13     16.91 o 
  -4   9   2     1363.94     1470.07     26.12 o 
  -3   9   2      158.39      176.53      7.39 o 
  -2   9   2      106.50      129.42      7.07 o 
  -1   9   2      634.16      655.94     16.20 o 
   0   9   2     2528.06     2549.36     51.37 o 
   1   9   2        4.07        4.70      4.89 o 
   2   9   2     2783.99     2815.45     58.14 o 
   3   9   2      986.02      907.33     73.08 o 
   4   9   2       45.28       16.75      6.41 o 
   5   9   2     1293.94     1453.64     39.02 o 
   6   9   2        6.53       14.30      5.93 o 
   7   9   2     1205.15     1135.56     29.45 o 
   8   9   2       44.29       38.58      6.61 o 
   9   9   2      589.65      670.36     51.02 o 
  10   9   2       78.52       91.17     18.35 o 
  -6  10   2        0.88       -6.02      8.34 o 
  -5  10   2      175.89      234.27     26.94 o 
  -4  10   2      129.02      153.55     11.57 o 
  -3  10   2       10.06       22.37      5.26 o 
  -2  10   2       93.89       99.80     18.35 o 
  -1  10   2      916.85      840.12     39.70 o 
   0  10   2      218.46      194.89     12.52 o 
   1  10   2       31.94       40.21      5.93 o 
   2  10   2     3401.30     3477.23     57.17 o 
   3  10   2      300.32      335.32     11.16 o 
   4  10   2      180.95      199.99     14.05 o 
   5  10   2      245.89      218.19     11.12 o 
   6  10   2      172.18      203.84     15.82 o 
   7  10   2        0.48        1.73      9.48 o 
   8  10   2      257.14      245.13     31.44 o 
   9  10   2      121.66      159.30     14.37 o 
  10  10   2       21.04       19.64     13.16 o 
  -5  11   2       11.71       21.45      9.84 o 
  -4  11   2      392.05      431.95     17.56 o 
  -3  11   2        0.36      -12.14     12.14 o 
  -2  11   2      710.23      697.82     17.81 o 
  -1  11   2      100.47      106.63      6.80 o 
   0  11   2       70.67       79.77      6.00 o 
   1  11   2       27.62       -6.89      9.89 o 
   2  11   2      395.50      311.34      9.84 o 
   3  11   2      238.01      179.32      8.02 o 
   4  11   2       57.31       67.91      6.70 o 
   5  11   2      230.83      245.82     14.25 o 
   6  11   2       45.90       45.56      7.25 o 
   7  11   2       12.42        3.79      9.27 o 
   8  11   2        0.57       22.36      9.79 o 
   9  11   2      350.45      351.56     18.44 o 
  -4  12   2        6.08       11.78     10.07 o 
  -3  12   2      127.18      118.29     17.12 o 
  -2  12   2       15.04       23.55      8.84 o 
  -1  12   2      782.56      900.30     43.31 o 
   0  12   2      119.09       86.24      9.86 o 
   1  12   2      166.59      148.53     16.34 o 
   2  12   2      188.62      169.99     10.20 o 
   3  12   2      105.04      103.90     14.70 o 
   4  12   2       85.44       89.78     13.68 o 
   5  12   2        1.44       -3.32      6.89 o 
   6  12   2      634.96      594.30     37.17 o 
   7  12   2        6.02        0.29     11.04 o 
   8  12   2      405.58      391.28     33.01 o 
   9  12   2      176.04      198.75     17.67 o 
  -2  13   2      235.55      225.92     14.48 o 
  -1  13   2      152.28      161.67     12.45 o 
   0  13   2       36.67       59.33      9.89 o 
   1  13   2      193.35      244.03     33.52 o 
   2  13   2       86.09       90.80     27.76 o 
   3  13   2        4.51        7.17      7.32 o 
   4  13   2       13.38       27.08     12.62 o 
   5  13   2      695.63      597.90     19.63 o 
   6  13   2        8.09       -0.26     12.07 o 
   7  13   2       15.96       10.30     12.50 o 
   8  13   2       41.29       55.14     12.12 o 
  -1  14   2      186.26      196.52     15.19 o 
   0  14   2       25.17       35.94     13.30 o 
   1  14   2      163.47      163.94     25.37 o 
   2  14   2      234.73      233.30     15.77 o 
   3  14   2       18.21       12.25     11.18 o 
   4  14   2        1.12        0.49      8.54 o 
   5  14   2        0.07        7.15     13.64 o 
   6  14   2      284.62      283.02     39.39 o 
  -5 -14   3       10.87       16.29     12.69 o 
  -4 -14   3       78.00       91.42     14.29 o 
  -3 -14   3      258.58      255.63     15.62 o 
  -2 -14   3       11.07       23.62      9.96 o 
  -1 -14   3      656.72      668.38     20.72 o 
   0 -14   3        9.10       -3.84      8.73 o 
  -7 -13   3      304.80      309.31     39.52 o 
  -6 -13   3        9.13       30.15      9.37 o 
  -5 -13   3       98.52       86.17     12.17 o 
  -4 -13   3     1006.86     1025.49     24.98 o 
  -3 -13   3       28.07       44.72     14.19 o 
  -2 -13   3       23.55       28.71      9.04 o 
  -1 -13   3        2.21       38.64     15.04 o 
   0 -13   3      653.00      684.73     21.55 o 
   1 -13   3       11.18        4.80     19.34 o 
   2 -13   3      133.31      164.03     13.17 o 
  -8 -12   3      108.40       89.59     28.95 o 
  -7 -12   3      233.55      198.53     15.05 o 
  -6 -12   3       57.06      103.33     13.37 o 
  -5 -12   3       25.86       39.10     16.30 o 
  -4 -12   3      280.75      270.23     16.30 o 
  -3 -12   3      233.52      251.29     26.67 o 
  -2 -12   3      159.79      194.68     31.48 o 
  -1 -12   3      369.05      361.11     14.25 o 
   0 -12   3       23.03       12.60     10.50 o 
   1 -12   3       52.44       45.28     16.37 o 
   2 -12   3      192.55      223.05     13.11 o 
   3 -12   3      167.68      171.11     12.71 o 
   4 -12   3       79.77      105.60     13.33 o 
  -9 -11   3        9.03       15.97     38.33 o 
  -8 -11   3       10.72       10.28     10.77 o 
  -7 -11   3      309.29      346.53     19.37 o 
  -6 -11   3      258.02      214.45     35.98 o 
  -5 -11   3      274.51      277.53      9.39 o 
  -4 -11   3      783.08      806.68     71.92 o 
  -3 -11   3       88.88       92.66      7.20 o 
  -2 -11   3     1411.66     1342.47     29.39 o 
  -1 -11   3        2.39       -4.64      4.64 o 
   0 -11   3      528.28      546.40     27.08 o 
   1 -11   3       14.01       26.85      4.97 o 
   2 -11   3       78.00      100.69      9.61 o 
   3 -11   3      788.06      822.00     21.00 o 
   4 -11   3       35.42       -1.79     10.36 o 
   5 -11   3       46.05       39.93     11.41 o 
  -9 -10   3       16.91       14.70     17.97 o 
  -8 -10   3      363.21      347.74     21.38 o 
  -7 -10   3       39.26       59.83     11.29 o 
  -6 -10   3       10.75      -16.97     18.01 o 
  -5 -10   3      389.09      402.09     16.34 o 
  -4 -10   3      660.35      731.54     51.39 o 
  -3 -10   3       93.75      117.32      7.25 o 
  -2 -10   3       73.99       75.00      6.84 o 
  -1 -10   3      995.47     1004.78     30.51 o 
   0 -10   3        4.33        0.74      4.24 o 
   1 -10   3       13.34       24.15      5.20 o 
   2 -10   3      134.45      136.23      8.32 o 
   3 -10   3      195.91      180.60     12.69 o 
   4 -10   3       12.37       21.60      8.83 o 
   5 -10   3      119.59      121.76     11.92 o 
   6 -10   3      204.56      213.25     14.28 o 
 -10  -9   3        0.04       -1.16     11.42 o 
  -9  -9   3       18.39       10.11     18.55 o 
  -8  -9   3       87.20      101.13     11.52 o 
  -7  -9   3      705.37      598.73     32.23 o 
  -6  -9   3      402.69      371.32     32.84 o 
  -5  -9   3     1559.73     1661.27     37.25 o 
  -4  -9   3     1389.90     1682.04     77.55 o 
  -3  -9   3      331.76      384.26     30.86 o 
  -2  -9   3       83.22       98.76      7.13 o 
  -1  -9   3      422.90      494.23     16.44 o 
   0  -9   3      124.57      104.50      6.39 o 
   1  -9   3       30.51       45.03      6.75 o 
   2  -9   3      402.04      410.99     10.97 o 
   3  -9   3       20.65        7.47      6.96 o 
   4  -9   3      113.99      102.24      7.39 o 
   5  -9   3      822.60      894.53     21.23 o 
   6  -9   3       18.60        9.91     23.53 o 
   7  -9   3       76.45       94.61     12.83 o 
 -10  -8   3        2.19       -9.98     11.65 o 
  -9  -8   3       55.42       73.33     48.02 o 
  -8  -8   3     1215.98     1134.67    109.44 o 
  -7  -8   3      423.89      364.46     11.55 o 
  -6  -8   3      145.58      158.85     12.28 o 
  -5  -8   3     1715.24     1698.69    109.23 o 
  -4  -8   3      294.82      306.95     15.18 o 
  -3  -8   3      905.37      796.69     41.26 o 
  -2  -8   3       40.84       17.53      5.22 o 
  -1  -8   3     2698.04     2708.55     58.82 o 
   0  -8   3      636.44      726.02     20.99 o 
   1  -8   3      276.40      246.20     21.31 o 
   2  -8   3     3060.77     2977.95     53.94 o 
   3  -8   3      193.43      168.68     10.15 o 
   4  -8   3       20.86       38.26     12.82 o 
   5  -8   3        3.97       10.05      5.18 o 
   6  -8   3     1172.50     1261.92     26.02 o 
   7  -8   3        0.23       12.50     10.47 o 
   8  -8   3      102.36       75.59     13.53 o 
 -10  -7   3       13.52       11.76     19.27 o 
  -9  -7   3      484.98      446.18     38.71 o 
  -8  -7   3      332.81      313.36     37.00 o 
  -7  -7   3     1818.44     1728.73     80.96 o 
  -6  -7   3      277.02      279.30     36.22 o 
  -5  -7   3       25.13       11.48     10.37 o 
  -4  -7   3     2910.74     2458.37    173.99 o 
  -3  -7   3      233.99      175.84      8.01 o 
  -2  -7   3      188.65      105.51     11.12 o 
  -1  -7   3      269.75      223.76     10.30 o 
   0  -7   3      147.06      129.57      6.39 o 
   1  -7   3     1630.17     1715.02     66.16 o 
   2  -7   3     1774.66     1587.17     45.60 o 
   3  -7   3      848.76      976.81     27.32 o 
   4  -7   3       16.07       24.24      5.39 o 
   5  -7   3      676.20      712.90     25.78 o 
   6  -7   3       43.83       41.38      6.10 o 
   7  -7   3        7.87        1.20     11.55 o 
   8  -7   3      168.80      214.68     24.14 o 
 -11  -6   3        3.16        6.27     12.80 o 
 -10  -6   3       40.41       55.47     17.49 o 
  -9  -6   3       57.53       50.23     11.29 o 
  -8  -6   3     1053.81     1062.13     78.06 o 
  -7  -6   3      119.07       77.94      7.31 o 
  -6  -6   3        4.53       -3.67     10.13 o 
  -5  -6   3       14.51       20.07      5.31 o 
  -4  -6   3       28.03       60.56      7.95 o 
  -3  -6   3     1712.43     1615.56     53.75 o 
  -2  -6   3      717.36      729.20     22.99 o 
  -1  -6   3     7213.09     5577.59     98.43 o 
   0  -6   3      117.00      136.45     10.67 o 
   1  -6   3     3621.80     3726.87     78.03 o 
   2  -6   3     2875.34     2604.72     63.24 o 
   3  -6   3     2036.88     2201.24     53.98 o 
   4  -6   3      236.33      272.79      8.87 o 
   5  -6   3       62.53       53.61      6.39 o 
   6  -6   3     3507.90     3529.84     65.10 o 
   7  -6   3        0.06      -11.70     11.70 o 
   8  -6   3      131.52      164.54     19.06 o 
   9  -6   3      233.22      244.03     16.15 o 
 -11  -5   3      338.04      307.24     31.92 o 
 -10  -5   3      169.49      131.48     38.50 o 
  -9  -5   3      343.16      367.82     43.75 o 
  -8  -5   3       13.17       19.10      6.10 o 
  -7  -5   3        3.66       32.61      6.34 o 
  -6  -5   3        6.44        5.29      6.85 o 
  -5  -5   3      747.60      706.53     28.65 o 
  -4  -5   3     3958.22     3771.87    222.04 o 
  -3  -5   3      707.40     1021.92     28.00 o 
  -2  -5   3    10515.53     9629.01    131.06 o 
  -1  -5   3     4977.30     5479.26    314.80 o 
   0  -5   3       44.99       81.80      4.89 o 
   1  -5   3     4852.34     5289.64     96.59 o 
   2  -5   3     3609.38     3489.10     80.61 o 
   3  -5   3     2099.34     1920.70     55.24 o 
   4  -5   3       71.71       59.25      5.83 o 
   5  -5   3     3051.07     2857.97     59.82 o 
   6  -5   3      180.10      203.72      8.92 o 
   7  -5   3       14.14       23.68      8.08 o 
   8  -5   3      298.78      347.39     16.83 o 
   9  -5   3      377.78      420.40     26.29 o 
 -11  -4   3        3.40       -6.78     10.48 o 
 -10  -4   3       17.74       26.15     10.19 o 
  -9  -4   3       49.21       28.36      7.67 o 
  -8  -4   3      800.28      799.48     21.94 o 
  -7  -4   3        9.08       28.31     13.13 o 
  -6  -4   3      127.38      103.72      7.28 o 
  -5  -4   3     3996.87     3697.44     76.44 o 
  -4  -4   3        0.57       -4.57     10.78 o 
  -3  -4   3        1.48        9.06      3.75 o 
  -2  -4   3      851.11     1388.55     35.40 o 
  -1  -4   3    10719.75    11070.70    171.20 o 
   0  -4   3      282.61      259.10      9.02 o 
   1  -4   3      151.68      173.90     18.42 o 
   2  -4   3     9706.00     9219.66    128.18 o 
   3  -4   3     1326.33     1365.62     55.69 o 
   4  -4   3     3061.64     2738.67     77.96 o 
   5  -4   3      160.81      199.43      8.37 o 
   6  -4   3     1449.85     1438.51     46.28 o 
   7  -4   3      247.86      235.26     27.73 o 
   8  -4   3      575.28      528.28     33.11 o 
   9  -4   3       32.89       23.83     14.60 o 
  10  -4   3        0.02       -9.90     11.43 o 
 -11  -3   3      378.41      333.46     24.62 o 
 -10  -3   3        1.83        0.54     10.16 o 
  -9  -3   3       23.28       35.09      6.39 o 
  -8  -3   3      532.95      492.68     31.85 o 
  -7  -3   3       14.14      405.31     31.00 o 
  -6  -3   3      293.33      305.13     10.13 o 
  -5  -3   3     1410.85     1281.07     51.46 o 
  -4  -3   3     6066.92     5772.99    102.82 o 
  -3  -3   3        6.41        9.23      3.59 o 
  -2  -3   3     7971.00     7933.78    118.75 o 
  -1  -3   3      892.36     1337.47     78.91 o 
   0  -3   3      545.94      586.28     18.55 o 
   1  -3   3     2892.51     3152.65     68.58 o 
   2  -3   3     4285.39     4400.22    200.05 o 
   3  -3   3      622.14      694.67     23.50 o 
   4  -3   3      105.11       81.48      5.90 o 
   5  -3   3      470.17      522.17     15.09 o 
   6  -3   3       30.52       19.47      5.93 o 
   7  -3   3       28.55       26.19      6.17 o 
   8  -3   3       27.98       42.47     11.08 o 
   9  -3   3      390.82      473.82     17.50 o 
  10  -3   3       53.59       85.84     13.35 o 
 -11  -2   3       37.52       32.52     11.62 o 
 -10  -2   3       15.64       33.38     10.75 o 
  -9  -2   3       19.82       16.81      5.43 o 
  -8  -2   3      816.90      883.11     29.45 o 
  -7  -2   3     1352.31     1340.40    111.21 o 
  -6  -2   3     1076.89     1106.59     29.52 o 
  -5  -2   3     2000.39     1628.97    289.26 o 
  -4  -2   3      306.35      324.88     19.37 o 
  -3  -2   3     2260.54     2013.17     62.08 o 
  -2  -2   3      201.53       76.70     17.80 o 
  -1  -2   3    19555.51    20726.52    150.37 o 
   0  -2   3       44.74       23.46      3.38 o 
   1  -2   3     7405.39     8112.50     98.67 o 
   2  -2   3     4705.90     4007.20     77.07 o 
   3  -2   3       29.29        8.73      3.44 o 
   4  -2   3      982.23      961.51     29.87 o 
   5  -2   3      424.69      372.39     17.87 o 
   6  -2   3       53.54       33.96      6.03 o 
   7  -2   3       63.54       56.48     13.61 o 
   8  -2   3      164.37      184.85     15.11 o 
   9  -2   3      569.19      537.66     20.36 o 
  10  -2   3       30.65       47.38     12.59 o 
 -11  -1   3       72.84       72.04     24.01 o 
 -10  -1   3      101.58       74.14     15.58 o 
  -9  -1   3       18.73       34.77      5.70 o 
  -8  -1   3       65.99       63.78     15.55 o 
  -7  -1   3        9.03       35.58     20.53 o 
  -6  -1   3     3018.68     2974.55     65.85 o 
  -5  -1   3     1779.74     1939.53     65.00 o 
  -4  -1   3     6640.54     6498.75    380.21 o 
  -3  -1   3     2189.31     2035.26     47.41 o 
  -2  -1   3    13157.42    13788.98    132.82 o 
  -1  -1   3     9820.06     9753.28     97.78 o 
   0  -1   3     2439.61     3863.18    241.75 o 
   1  -1   3     4757.37     4883.12     80.48 o 
   2  -1   3      342.06      398.54     12.26 o 
   3  -1   3      675.51      821.06     41.57 o 
   4  -1   3      466.42      521.07     20.15 o 
   5  -1   3     2067.90     2596.63     67.77 o 
   6  -1   3        5.99        7.00      6.89 o 
   7  -1   3     1187.04     1062.08     35.33 o 
   8  -1   3      370.16      391.81     18.79 o 
   9  -1   3      259.91      239.39      9.31 o 
  10  -1   3       48.06       66.52     14.32 o 
  11  -1   3        4.76        6.78     10.17 o 
 -11   0   3        2.67       -4.20      9.21 o 
 -10   0   3        0.06        4.85     19.27 o 
  -9   0   3      192.17      203.99     23.74 o 
  -8   0   3      124.34      140.99      8.18 o 
  -7   0   3      163.78      199.49      9.33 o 
  -6   0   3     1336.32     1380.27     45.94 o 
  -5   0   3     8602.54     8654.80    119.12 o 
  -4   0   3      212.28      228.81      7.64 o 
  -3   0   3      261.42      172.38      6.99 o 
  -2   0   3      988.75     1302.60     42.99 o 
  -1   0   3     2429.82     2640.64     55.79 o 
   0   0   3        6.27        9.60      2.08 o 
   1   0   3     3940.78     3850.53    106.37 o 
   2   0   3     2011.59     2823.29     59.10 o 
   3   0   3     1694.02     1936.36     58.64 o 
   4   0   3     1334.31      896.83     26.52 o 
   5   0   3      531.63      726.28     39.63 o 
   6   0   3     1932.08     1671.35     51.58 o 
   7   0   3        6.49      162.63     77.58 o 
   8   0   3      636.23      762.90     18.81 o 
   9   0   3       85.90       81.25     12.17 o 
  10   0   3        0.84        6.10     12.21 o 
  11   0   3      195.67      183.38     55.01 o 
 -10   1   3       25.57       15.07     12.48 o 
  -9   1   3      751.56      862.64     22.45 o 
  -8   1   3      553.31      483.09     35.26 o 
  -7   1   3       49.45       15.14     15.79 o 
  -6   1   3     2078.39     1953.96     52.35 o 
  -5   1   3      151.84      189.01      8.05 o 
  -4   1   3      807.47      889.20     24.87 o 
  -3   1   3      327.49      289.43     10.19 o 
  -2   1   3     4358.65     3778.12    102.55 o 
  -1   1   3      506.16      526.42     23.02 o 
   0   1   3     7106.85     8257.86     83.68 o 
   1   1   3    18610.96    17430.24    255.36 o 
   2   1   3     1335.39     1561.03     58.42 o 
   3   1   3      706.98      791.03     19.69 o 
   4   1   3     2267.35     2500.52    147.49 o 
   5   1   3     2462.65     2262.81     72.64 o 
   6   1   3        5.51        4.71      5.27 o 
   7   1   3      207.80      235.26     11.83 o 
   8   1   3      287.15      299.80     13.33 o 
   9   1   3      271.09      259.14     19.95 o 
  10   1   3      220.33      213.29     18.48 o 
  11   1   3        9.86       20.05      9.93 o 
 -10   2   3       55.48       85.24     24.55 o 
  -9   2   3      703.31      636.09     20.03 o 
  -8   2   3      307.78      287.49     10.09 o 
  -7   2   3      541.74      556.45     42.59 o 
  -6   2   3      188.90      218.32     20.56 o 
  -5   2   3     4586.31     5224.89     88.57 o 
  -4   2   3       84.14       82.64      5.82 o 
  -3   2   3     1827.18     2164.57     72.13 o 
  -2   2   3      720.65      557.28     15.31 o 
  -1   2   3    10273.63    11555.80    116.45 o 
   0   2   3       70.45       65.77      3.47 o 
   1   2   3    19906.29    20947.59    448.86 o 
   2   2   3     3549.85     3799.01    305.73 o 
   3   2   3       96.60      211.38    111.82 o 
   4   2   3     4402.09     4010.37     91.28 o 
   5   2   3      232.35      213.36      8.96 o 
   6   2   3      415.93      379.65     10.83 o 
   7   2   3     1536.91     1849.95     51.96 o 
   8   2   3     1330.60     1302.71     36.88 o 
   9   2   3      121.04      120.57      7.84 o 
  10   2   3       63.04       55.92     14.66 o 
  11   2   3      878.96      827.85     54.26 o 
 -10   3   3        2.22       14.66     29.64 o 
  -9   3   3      741.02      758.63     21.57 o 
  -8   3   3      226.22      195.66     10.61 o 
  -7   3   3      364.72      349.83     11.19 o 
  -6   3   3      310.73      294.14     10.54 o 
  -5   3   3       14.74       11.03      5.19 o 
  -4   3   3      428.65      302.31      9.68 o 
  -3   3   3      266.18      286.46     11.87 o 
  -2   3   3     5738.92     5000.20    124.34 o 
  -1   3   3     1015.16     1292.08     31.88 o 
   0   3   3      104.69       87.25      5.29 o 
   1   3   3      811.19      582.91     15.89 o 
   2   3   3     1933.09     1993.12    215.84 o 
   3   3   3     2102.55     2378.75     67.07 o 
   4   3   3      214.86      121.06     32.64 o 
   5   3   3     2638.62     3038.44    120.52 o 
   6   3   3      410.19      453.98     53.23 o 
   7   3   3      197.03      247.74      9.92 o 
   8   3   3     2568.50     2544.87    128.70 o 
   9   3   3        7.73        4.20      8.90 o 
  10   3   3       41.10       23.92     10.99 o 
  11   3   3       11.64        8.97     14.73 o 
  -9   4   3      137.88      105.08     20.50 o 
  -8   4   3      197.85      181.82     24.89 o 
  -7   4   3       93.45       76.30     12.04 o 
  -6   4   3       15.19       19.50      6.06 o 
  -5   4   3      300.15      332.47     29.74 o 
  -4   4   3      320.22      354.59     11.03 o 
  -3   4   3     2693.05     2543.84    143.71 o 
  -2   4   3      565.10      669.40     19.39 o 
  -1   4   3      521.58      540.46     15.82 o 
   0   4   3     2340.86     2329.68     62.04 o 
   1   4   3     7202.95     7157.65    105.57 o 
   2   4   3     4808.36     4644.80     88.11 o 
   3   4   3     2223.98     2541.57    109.44 o 
   4   4   3     2040.76     1717.37     67.15 o 
   5   4   3     2233.89     2463.59     68.22 o 
   6   4   3      332.19      296.72     11.19 o 
   7   4   3     1361.36     1262.50     41.90 o 
   8   4   3     1825.91     1797.25     60.81 o 
   9   4   3      485.94      456.35     33.66 o 
  10   4   3       13.37       25.03     10.66 o 
  11   4   3      385.31      393.51     34.96 o 
  -9   5   3       67.55      107.16     13.91 o 
  -8   5   3      382.88      327.79     18.60 o 
  -7   5   3        2.56       -5.41      5.41 o 
  -6   5   3     1381.77     1556.98     40.85 o 
  -5   5   3      607.71      633.57     14.86 o 
  -4   5   3        0.22       -0.54      4.95 o 
  -3   5   3       97.37      213.40     12.96 o 
  -2   5   3     9528.17     9930.26    125.71 o 
  -1   5   3     3256.43     3535.69     80.48 o 
   0   5   3      122.79       89.77      4.75 o 
   1   5   3    11418.38    10711.10    138.82 o 
   3   5   3       13.42       21.51      3.84 o 
   4   5   3     1140.57     1068.70     43.62 o 
   5   5   3     1281.52     1161.67     45.36 o 
   6   5   3       41.19       32.71      6.51 o 
   7   5   3      591.76      572.76     15.21 o 
   8   5   3      480.27      547.06     68.85 o 
   9   5   3       15.43       13.06      6.51 o 
  10   5   3      491.71      440.03     42.36 o 
  11   5   3        0.83      -10.57     14.36 o 
  -8   6   3       27.88       48.54     11.47 o 
  -7   6   3       13.71        2.12     18.42 o 
  -6   6   3        0.10        1.51      5.34 o 
  -5   6   3      457.75      499.59     12.66 o 
  -4   6   3       11.31        6.89      5.43 o 
  -3   6   3     3910.43     4080.65     71.41 o 
  -2   6   3     1677.33     1531.62     81.16 o 
  -1   6   3     1074.22     1314.59     45.08 o 
   0   6   3      992.04     1073.15     27.78 o 
   1   6   3      158.26      131.98     17.43 o 
   2   6   3     2567.40     2813.63     72.04 o 
   3   6   3       80.13       69.10      5.47 o 
   5   6   3      247.91      266.79     26.09 o 
   6   6   3        4.90        6.00      5.41 o 
   7   6   3      457.43      434.78     25.71 o 
   8   6   3       80.06       69.00      8.69 o 
   9   6   3       70.22       80.20     15.76 o 
  10   6   3        7.26       13.15     12.91 o 
  11   6   3      302.83      278.33     27.69 o 
  -8   7   3        2.12        4.25     13.38 o 
  -7   7   3       23.93       32.52     12.66 o 
  -6   7   3     1220.54     1180.84     65.00 o 
  -5   7   3      212.41      218.08     14.02 o 
  -4   7   3       39.61       42.03      6.03 o 
  -3   7   3      286.83      387.49     18.18 o 
  -2   7   3     1380.97     1238.53     58.01 o 
  -1   7   3     2887.18     2866.66    158.71 o 
   0   7   3       53.39       43.63      7.60 o 
   1   7   3     1943.33     1558.26     83.62 o 
   2   7   3      246.93      263.68     13.44 o 
   3   7   3      158.37      140.65      6.83 o 
   4   7   3      426.37      344.03     25.51 o 
   5   7   3     2390.88     2483.42     77.89 o 
   6   7   3      195.08      200.52     17.80 o 
   7   7   3     1693.66     1776.33     58.11 o 
   8   7   3       87.75       59.00      7.71 o 
   9   7   3        8.57       16.29     10.75 o 
  10   7   3      100.05      133.01     23.22 o 
  11   7   3        2.02        0.67      9.73 o 
  -7   8   3      149.58      164.59     15.15 o 
  -6   8   3       50.45       38.72     10.78 o 
  -5   8   3      945.83      986.51     24.83 o 
  -4   8   3        1.43       -4.79      5.64 o 
  -3   8   3      890.55      931.53     29.74 o 
  -2   8   3     2063.28     2223.48     62.51 o 
  -1   8   3       70.89       34.35      5.86 o 
   0   8   3     3332.80     3318.58     63.49 o 
   1   8   3       27.75       18.96      4.38 o 
   2   8   3      313.02      230.33     11.46 o 
   3   8   3      109.55      102.34      6.11 o 
   4   8   3     3085.75     3212.91    218.70 o 
   5   8   3     1086.42     1133.01     39.35 o 
   6   8   3        0.49       -2.97      6.65 o 
   7   8   3      574.44      462.38     47.27 o 
   8   8   3       39.38       47.79      6.73 o 
   9   8   3        0.91        4.82     10.13 o 
  10   8   3        2.79       -9.50     12.78 o 
  11   8   3      273.86      288.58     18.82 o 
  -7   9   3        1.86        5.09     10.96 o 
  -6   9   3      585.25      654.22     20.20 o 
  -5   9   3       45.80       38.88     10.68 o 
  -4   9   3       62.76       52.55      5.99 o 
  -3   9   3      165.14      140.00      8.58 o 
  -2   9   3      327.62      339.05      9.62 o 
  -1   9   3        3.84        7.89      4.99 o 
   0   9   3       10.97       17.53      4.96 o 
   1   9   3     5590.16     5483.34     75.31 o 
   2   9   3      189.46      143.80      9.79 o 
   3   9   3     1109.61     1050.80     28.31 o 
   4   9   3      264.34      379.88     15.99 o 
   5   9   3       55.73       43.62      7.29 o 
   6   9   3      215.96      148.23     42.29 o 
   7   9   3      375.41      411.00     13.30 o 
   8   9   3      116.44      158.06     17.29 o 
   9   9   3       19.51       33.71     11.17 o 
  10   9   3       92.22       73.41     19.75 o 
  -6  10   3        8.27       16.55     10.08 o 
  -5  10   3      475.96      520.52     18.91 o 
  -4  10   3        0.21       -6.63     14.66 o 
  -3  10   3      517.07      489.14     14.36 o 
  -2  10   3      243.61      237.76      9.28 o 
  -1  10   3       40.99       50.35      8.93 o 
   0  10   3      398.68      355.20     10.01 o 
   1  10   3        0.61        5.38      5.74 o 
   2  10   3      731.09      859.46     19.76 o 
   3  10   3      206.08      162.41     18.38 o 
   4  10   3      566.74      563.40     39.01 o 
   5  10   3        2.43        6.81      6.07 o 
   6  10   3        8.46        4.99      6.15 o 
   7  10   3       13.81       -0.32      7.09 o 
   8  10   3       26.33       22.48      9.72 o 
   9  10   3        0.05        8.87     10.68 o 
  10  10   3        4.60      -11.00     11.00 o 
  -5  11   3        2.56       -1.17     10.36 o 
  -4  11   3        1.42        6.19      9.04 o 
  -3  11   3      483.89      516.56     18.01 o 
  -2  11   3       33.12       64.95      8.98 o 
  -1  11   3       16.97       23.40      4.90 o 
   0  11   3      255.32      273.74      9.92 o 
   1  11   3      577.68      564.24     19.51 o 
   2  11   3        4.04        0.32      6.00 o 
   3  11   3     1809.87     1763.67     34.96 o 
   4  11   3        7.51       45.98     12.07 o 
   5  11   3      206.51      248.59      9.38 o 
   6  11   3      522.15      535.41     56.64 o 
   7  11   3       90.42       59.36     12.54 o 
   8  11   3      107.49      104.42     25.24 o 
   9  11   3        0.17       -9.33      9.33 o 
  -4  12   3       57.61       73.60     13.17 o 
  -3  12   3      243.86      271.11     18.89 o 
  -2  12   3      218.64      245.69     13.32 o 
  -1  12   3       53.71       49.67     29.87 o 
   0  12   3     1148.74     1060.02     27.79 o 
   1  12   3      100.72       85.31     11.47 o 
   2  12   3        4.90        3.36      4.38 o 
   3  12   3        1.25        3.52      4.65 o 
   4  12   3      241.54      262.22     21.55 o 
   5  12   3        5.96       14.49      7.93 o 
   6  12   3      118.47      121.44     28.68 o 
   7  12   3      333.85      310.92     25.17 o 
   8  12   3        2.18        2.50     13.44 o 
   9  12   3       12.98        9.44     23.26 o 
  -2  13   3       42.43       37.07      9.83 o 
  -1  13   3       84.25       67.24     10.64 o 
   0  13   3       57.73       32.17      9.82 o 
   1  13   3      523.76      571.67     18.97 o 
   2  13   3        2.33        4.95      8.33 o 
   3  13   3       60.35      100.25     12.07 o 
   4  13   3      212.86      221.42     14.54 o 
   5  13   3       20.77       28.61     11.89 o 
   6  13   3       49.23      117.82     12.50 o 
   7  13   3      106.24      105.47     21.83 o 
   8  13   3      236.53      228.18     17.32 o 
   0  14   3      470.70      505.17     18.80 o 
   1  14   3        0.13        0.34      8.59 o 
   2  14   3       24.83       31.25     19.81 o 
   3  14   3      102.58       79.30     11.90 o 
   4  14   3      176.61      177.88     15.90 o 
   5  14   3       25.13       22.91     10.70 o 
   6  14   3       53.34       60.60     13.88 o 
  -5 -14   4      303.50      310.07     17.01 o 
  -4 -14   4        8.35       13.94     10.38 o 
  -3 -14   4      528.78      546.19     20.85 o 
  -2 -14   4      323.21      291.28     19.88 o 
  -1 -14   4      147.82      159.78     15.21 o 
   0 -14   4      116.09      122.50     12.35 o 
  -7 -13   4        0.70        3.00     11.63 o 
  -6 -13   4      224.22      251.93     18.52 o 
  -5 -13   4       38.08       30.59      9.49 o 
  -4 -13   4        3.52        0.93     11.19 o 
  -3 -13   4       20.54       21.68      8.71 o 
  -2 -13   4      255.27      282.99     17.87 o 
  -1 -13   4      174.02      193.12     12.60 o 
   0 -13   4       96.39       87.18     23.26 o 
   1 -13   4      384.86      425.37     29.02 o 
   2 -13   4       15.46       29.61      9.67 o 
  -8 -12   4        2.52       -8.79      8.79 o 
  -7 -12   4        6.76       -2.87     10.43 o 
  -6 -12   4       33.88       72.93     11.72 o 
  -5 -12   4      384.06      363.90     16.53 o 
  -4 -12   4       72.70       87.58     11.45 o 
  -3 -12   4     1037.82     1018.88     22.56 o 
  -2 -12   4       14.35       29.64      7.81 o 
  -1 -12   4        7.62        5.48      7.74 o 
   0 -12   4       32.97       44.05      9.90 o 
   1 -12   4       11.52       29.39      9.62 o 
   2 -12   4      217.95      215.57     14.09 o 
   3 -12   4        0.46        3.67      9.24 o 
   4 -12   4      173.87      178.26     13.99 o 
  -9 -11   4      109.19      123.35     62.24 o 
  -8 -11   4       24.20       51.65     13.54 o 
  -7 -11   4      458.46      420.24     40.34 o 
  -6 -11   4      428.78      398.29     68.00 o 
  -5 -11   4        2.74       23.96      9.56 o 
  -4 -11   4       44.08       40.93     14.25 o 
  -3 -11   4       86.96       65.22      6.53 o 
  -2 -11   4      638.22      608.12     22.41 o 
  -1 -11   4       10.22        6.78      4.63 o 
   0 -11   4       75.82       84.00     18.79 o 
   1 -11   4      391.02      416.53     10.10 o 
   2 -11   4        0.66        2.79      7.62 o 
   3 -11   4      214.53      237.61     43.11 o 
   4 -11   4       20.53       20.22     11.64 o 
   5 -11   4       37.34       41.88      9.92 o 
  -9 -10   4      149.90      138.78     18.01 o 
  -8 -10   4        1.82        3.80     10.42 o 
  -7 -10   4      635.38      580.65     63.64 o 
  -6 -10   4       37.11       16.50      7.57 o 
  -5 -10   4      768.03      750.64     23.72 o 
  -4 -10   4        0.39       10.54     13.23 o 
  -3 -10   4     1016.21      959.53     28.60 o 
  -2 -10   4     1133.78     1150.44     56.06 o 
  -1 -10   4       19.29       22.66      8.80 o 
   0 -10   4       47.42       43.64      5.92 o 
   1 -10   4        4.23       19.88      4.84 o 
   2 -10   4      113.81      119.09     11.05 o 
   3 -10   4      283.58      208.67     30.93 o 
   4 -10   4     1407.18     1497.14     25.92 o 
   5 -10   4       25.50       36.92     10.51 o 
   6 -10   4       38.48       26.06     13.45 o 
 -10  -9   4       11.88        8.56     15.62 o 
  -9  -9   4       68.27      123.12     48.26 o 
  -8  -9   4       51.09       48.84     15.41 o 
  -7  -9   4        5.29       -2.27      5.62 o 
  -6  -9   4     1121.69     1177.11     42.53 o 
  -5  -9   4       11.12       17.68      6.82 o 
  -4  -9   4      254.81      267.30     14.56 o 
  -3  -9   4       34.03       57.41      6.20 o 
  -2  -9   4      616.13      642.61     17.08 o 
  -1  -9   4        4.17       11.86      5.49 o 
   0  -9   4      386.70      348.52      9.79 o 
   1  -9   4     3014.18     3129.92     52.91 o 
   2  -9   4      100.21      108.75     13.37 o 
   3  -9   4      481.43      556.87     12.96 o 
   4  -9   4      184.64      199.48      8.17 o 
   5  -9   4      477.57      482.60     18.21 o 
   6  -9   4       32.21       28.72     10.70 o 
   7  -9   4       58.93       70.71     11.28 o 
 -10  -8   4       71.21       62.39     12.00 o 
  -9  -8   4      365.04      375.18     53.17 o 
  -8  -8   4       23.49       19.42     11.04 o 
  -7  -8   4      825.80      808.59     18.30 o 
  -6  -8   4      281.58      231.67     23.70 o 
  -5  -8   4      347.19      319.72     20.05 o 
  -4  -8   4       92.62       56.57      6.53 o 
  -3  -8   4      515.57      446.98     13.96 o 
  -2  -8   4      933.18      964.67     25.02 o 
  -1  -8   4      337.01      323.65     11.97 o 
   0  -8   4     1232.02     1352.36     39.35 o 
   1  -8   4      390.37      408.87     11.52 o 
   2  -8   4      157.76      103.03      6.69 o 
   3  -8   4      143.63      143.42     19.61 o 
   4  -8   4      702.03      734.14     18.13 o 
   5  -8   4       27.49       24.97      6.29 o 
   6  -8   4       59.52       46.83     10.74 o 
   7  -8   4       37.45       34.56     11.36 o 
 -10  -7   4      363.65      402.23     18.83 o 
  -9  -7   4      113.80      101.34     24.45 o 
  -8  -7   4       13.05       11.36      6.05 o 
  -7  -7   4       27.49       13.64      8.95 o 
  -6  -7   4     1494.23     1543.55     38.97 o 
  -5  -7   4      210.56      150.73     13.78 o 
  -4  -7   4      137.01      148.50     25.20 o 
  -3  -7   4      393.30      394.22     13.46 o 
  -2  -7   4      135.55      225.56     23.19 o 
  -1  -7   4     2750.86     2599.84     92.21 o 
   0  -7   4     1112.25     1149.10     29.67 o 
   1  -7   4     5401.50     4487.15    155.92 o 
   2  -7   4      977.09     1192.35     30.75 o 
   3  -7   4     1314.38     1273.81     39.14 o 
   4  -7   4      144.86      168.34     13.10 o 
   5  -7   4      125.51      148.96      8.05 o 
   6  -7   4      163.12      170.78      8.25 o 
   7  -7   4      141.57      146.05     13.63 o 
   8  -7   4      157.61      148.94     14.71 o 
 -10  -6   4      130.11      175.80     14.70 o 
  -9  -6   4      355.16      387.74     26.77 o 
  -8  -6   4       16.53        4.36      5.85 o 
  -7  -6   4       37.59       50.61     20.39 o 
  -6  -6   4       41.47       30.82      5.56 o 
  -5  -6   4      437.69      467.14     26.60 o 
  -4  -6   4      294.81      286.97     32.16 o 
  -3  -6   4      793.02      825.18     32.64 o 
  -2  -6   4     2373.19     1857.04     56.59 o 
  -1  -6   4       38.61       44.01      5.13 o 
   0  -6   4     4070.67     4106.07     83.36 o 
   1  -6   4       49.10       62.61      5.21 o 
   2  -6   4     2745.26     2638.56     67.52 o 
   4  -6   4     1040.63     1077.48     36.37 o 
   5  -6   4      117.78      158.36      8.32 o 
   6  -6   4      167.32      200.51      9.30 o 
   7  -6   4     1193.68     1213.30     24.06 o 
   8  -6   4       30.49       22.12     10.14 o 
   9  -6   4       32.02       46.03     53.98 o 
 -11  -5   4       11.60        4.93     12.96 o 
 -10  -5   4      460.83      422.54     20.80 o 
  -9  -5   4      337.61      361.53     21.55 o 
  -8  -5   4      126.53      131.73     25.27 o 
  -7  -5   4      238.75      235.59      9.56 o 
  -6  -5   4      944.23     1100.79     43.41 o 
  -5  -5   4       62.37      120.21     12.35 o 
  -4  -5   4      447.90      416.21     15.18 o 
  -3  -5   4      682.03      683.84     27.79 o 
  -2  -5   4     1157.59     1165.85     74.55 o 
  -1  -5   4     5747.15     5342.56     99.06 o 
   0  -5   4     2792.95     2837.54    122.33 o 
   1  -5   4     9278.84     8964.82    418.17 o 
   2  -5   4     1160.86     1323.00     33.08 o 
   3  -5   4     1370.03     1454.54     39.11 o 
   4  -5   4     1280.15     1036.93     25.56 o 
   5  -5   4      105.95       91.05      7.02 o 
   6  -5   4       65.67       71.16      7.07 o 
   7  -5   4      408.99      443.55     11.28 o 
   8  -5   4       14.01       42.18     10.81 o 
   9  -5   4       71.24       96.37     23.97 o 
 -11  -4   4       63.60       70.94     14.76 o 
 -10  -4   4      197.95      235.06     14.71 o 
  -9  -4   4      939.67      902.47     88.22 o 
  -8  -4   4        2.17        1.95      7.07 o 
  -7  -4   4      227.56      309.51     10.31 o 
  -6  -4   4        0.45        3.49     10.26 o 
  -5  -4   4      483.61      491.74     19.85 o 
  -4  -4   4      462.51      386.33     12.06 o 
  -3  -4   4    13022.68    12175.16    405.17 o 
  -2  -4   4     2636.71     2775.86     73.32 o 
  -1  -4   4     2763.54     3088.71     76.90 o 
   0  -4   4    14135.97    13677.73    191.11 o 
   1  -4   4       55.13       77.10      4.53 o 
   2  -4   4      124.59      120.59     14.43 o 
   3  -4   4     1448.74     1669.78    112.74 o 
   4  -4   4     1393.76     1191.70     31.34 o 
   5  -4   4      257.13      243.84     11.24 o 
   6  -4   4       53.15       50.42      6.97 o 
   7  -4   4      868.58     1000.16     41.43 o 
   8  -4   4        4.53        4.39     31.99 o 
   9  -4   4      118.79      109.73     18.72 o 
  10  -4   4        1.66       18.34     13.06 o 
 -11  -3   4        9.10        1.31     14.66 o 
 -10  -3   4      302.48      266.27     49.41 o 
  -9  -3   4       55.38       59.15      9.65 o 
  -8  -3   4        4.82        4.86      5.60 o 
  -7  -3   4      520.86      448.02     59.61 o 
  -6  -3   4     1950.03     1788.76     65.14 o 
  -5  -3   4     2043.69     2469.19     86.69 o 
  -4  -3   4     1201.73      977.09     37.75 o 
  -3  -3   4     9366.78     9220.73    129.59 o 
  -2  -3   4      467.38      719.29     32.60 o 
  -1  -3   4      904.18      793.45     22.91 o 
   0  -3   4      634.76      597.84     26.02 o 
   1  -3   4     6232.00     6125.07    136.72 o 
   2  -3   4      152.78      217.29     24.79 o 
   3  -3   4     1538.82     1246.93     33.42 o 
   4  -3   4     2001.09     2180.89     61.25 o 
   5  -3   4       18.38       45.79      5.98 o 
   6  -3   4      416.73      319.80     10.09 o 
   7  -3   4      270.06      307.59     10.80 o 
   8  -3   4       38.07        9.84      6.18 o 
   9  -3   4        2.12       -9.60     10.85 o 
  10  -3   4      176.30      218.35     17.12 o 
 -11  -2   4        5.22        7.66      9.43 o 
 -10  -2   4       21.08        0.01     10.95 o 
  -9  -2   4      152.64      129.98     11.42 o 
  -8  -2   4       33.86       37.07      6.48 o 
  -7  -2   4     1890.37     2086.35     64.66 o 
  -6  -2   4        9.66       27.66     12.52 o 
  -5  -2   4     1594.26     1694.23    146.78 o 
  -4  -2   4     5398.68     5460.98    101.20 o 
  -3  -2   4     5533.53     5425.12    116.15 o 
  -2  -2   4     3655.97     3424.59    145.75 o 
  -1  -2   4       78.92      103.67      7.71 o 
   0  -2   4      196.53       76.30     34.89 o 
   1  -2   4        1.92        1.09      2.34 o 
   2  -2   4     2666.27     2630.99     74.31 o 
   3  -2   4       37.37       42.96      7.23 o 
   4  -2   4     5769.18     5953.57    101.71 o 
   5  -2   4      288.54      263.00      9.35 o 
   6  -2   4     1022.64      929.96     23.99 o 
   7  -2   4       92.75      106.55     13.33 o 
   8  -2   4       12.19       -6.30      6.30 o 
   9  -2   4       59.22       62.66     12.19 o 
  10  -2   4       25.25       33.02     14.77 o 
 -11  -1   4       24.61       17.65     18.65 o 
 -10  -1   4      250.21      209.94     46.82 o 
  -9  -1   4       30.24       34.36      9.57 o 
  -8  -1   4       18.17       12.68      8.36 o 
  -7  -1   4       26.46       17.29      8.56 o 
  -6  -1   4     2028.35     1855.29     54.86 o 
  -5  -1   4        4.16        7.26      4.95 o 
  -4  -1   4     4534.80     4410.89    156.36 o 
  -3  -1   4      427.21      332.54     19.27 o 
  -2  -1   4     1537.66     2419.99     63.03 o 
  -1  -1   4     5307.11     4991.68     79.77 o 
   0  -1   4      160.84      148.91      4.17 o 
   1  -1   4       59.18       30.22      5.29 o 
   2  -1   4     1596.26     1643.59     60.84 o 
   3  -1   4     4588.13     4248.50     89.26 o 
   4  -1   4     8162.89     7844.62    127.68 o 
   5  -1   4       21.48       67.48      7.10 o 
   6  -1   4      487.62      488.36     14.86 o 
   7  -1   4       41.25      -10.88     10.88 o 
   8  -1   4       74.38       42.60      6.78 o 
   9  -1   4        0.77        3.71      8.37 o 
  10  -1   4      868.97      954.52     24.53 o 
  11  -1   4       26.27       39.47     12.52 o 
 -10   0   4      274.13      294.41     17.83 o 
  -9   0   4      128.57       92.69     11.43 o 
  -8   0   4      151.36      169.03      8.96 o 
  -7   0   4     1629.65     1567.79     40.51 o 
  -6   0   4      176.73      192.60     23.56 o 
  -5   0   4       88.36      156.63     13.95 o 
  -4   0   4     5420.62     4919.11    100.81 o 
  -3   0   4      240.75      219.12      9.72 o 
  -2   0   4       25.10      383.98    167.92 o 
  -1   0   4     2649.72     3467.19     77.00 o 
   0   0   4    60968.28    66105.10    260.82 o 
   1   0   4     6298.41     6265.11    158.82 o 
   2   0   4      369.83      356.42     11.61 o 
   3   0   4     4106.60     3783.30     82.60 o 
   4   0   4       86.78       92.78      5.57 o 
   5   0   4      286.54      418.62     14.73 o 
   6   0   4     1413.02     1316.63     32.89 o 
   7   0   4     2322.02     2181.84     54.56 o 
   8   0   4       39.56       29.56      6.94 o 
   9   0   4      382.82      362.81     16.85 o 
  10   0   4       39.61       62.95     14.33 o 
  11   0   4      153.36      153.88     21.08 o 
 -10   1   4      282.62      233.95     20.29 o 
  -9   1   4       14.49       31.77     14.80 o 
  -8   1   4       85.97       65.98     29.16 o 
  -7   1   4      602.02      579.90     22.92 o 
  -6   1   4     1247.54     1325.87     43.84 o 
  -5   1   4      959.56     1138.70     29.30 o 
  -4   1   4     1746.60     1518.34     86.83 o 
  -3   1   4       92.77       87.54      5.18 o 
  -2   1   4      290.75      266.03     12.28 o 
  -1   1   4      765.09      882.25     22.23 o 
   0   1   4      119.58      139.72      4.15 o 
   1   1   4      939.39      896.15     22.40 o 
   2   1   4     1660.93     3069.28     65.66 o 
   3   1   4     7878.45     6423.86    135.42 o 
   4   1   4      102.95       81.79     10.37 o 
   5   1   4      150.00      160.67      7.81 o 
   6   1   4     3856.00     3620.68     76.27 o 
   7   1   4      135.72      161.99      9.04 o 
   8   1   4        0.08        8.37      5.52 o 
   9   1   4      170.19      141.78     18.96 o 
  10   1   4      773.12      879.48     77.69 o 
  11   1   4       16.20       38.35     20.43 o 
 -10   2   4        7.61       21.80     12.02 o 
  -9   2   4        1.75       10.63     10.38 o 
  -8   2   4       46.00        8.13      7.46 o 
  -7   2   4     1690.39     1480.50     38.33 o 
  -6   2   4       52.49       27.35      7.67 o 
  -5   2   4      223.24      202.12      8.36 o 
  -4   2   4     3134.50     2944.78    113.08 o 
  -3   2   4     1678.34     1545.67     43.75 o 
  -2   2   4     1264.40     1193.07     48.66 o 
  -1   2   4      371.93      494.69     14.63 o 
   0   2   4     1787.14     1358.30     44.76 o 
   1   2   4     4452.43     4656.47     76.08 o 
   2   2   4    11397.14    11593.89    128.17 o 
   3   2   4      356.85      468.40     84.30 o 
   4   2   4      193.50      231.06      8.39 o 
   5   2   4     2678.05     2660.76     72.70 o 
   6   2   4      139.49      154.20      7.98 o 
   7   2   4     3871.53     3800.61    151.18 o 
   8   2   4        0.02       -5.24      6.37 o 
   9   2   4        9.96       20.75      6.17 o 
  10   2   4      161.06      209.99     23.67 o 
  11   2   4        1.00        1.43     14.21 o 
 -10   3   4      266.26      290.50     16.95 o 
  -9   3   4      213.92      180.07     13.82 o 
  -8   3   4     1170.64     1109.27     30.35 o 
  -7   3   4       63.13       86.08     10.23 o 
  -6   3   4      194.43      234.47      9.15 o 
  -5   3   4       10.92        7.63      4.86 o 
  -4   3   4     1169.65     1129.07     42.22 o 
  -3   3   4      763.70      793.25     24.26 o 
  -2   3   4        7.71       13.27      3.54 o 
  -1   3   4     4106.22     3902.65     84.57 o 
   0   3   4      280.70      219.48     10.81 o 
   1   3   4        8.38       62.91     10.37 o 
   2   3   4     2202.68     2882.83    101.90 o 
   3   3   4     7201.17     6760.93    122.16 o 
   4   3   4     9580.33     9519.12    291.58 o 
   5   3   4      157.05      144.76     13.06 o 
   6   3   4     3949.45     3509.53    208.95 o 
   7   3   4       93.41      167.55     10.06 o 
   8   3   4       44.42       42.01      7.98 o 
   9   3   4      122.63      104.19     11.73 o 
  10   3   4      457.15      507.77     53.17 o 
  11   3   4       39.16       22.56     11.27 o 
  -9   4   4       11.70        4.25     13.00 o 
  -8   4   4       54.78      132.93     24.08 o 
  -7   4   4      885.03      896.91     32.77 o 
  -6   4   4        4.04        9.99      6.55 o 
  -5   4   4       29.44       46.04      9.62 o 
  -4   4   4      718.97      472.09     13.33 o 
  -3   4   4       27.52       78.10     10.47 o 
  -2   4   4        0.66        9.24      4.00 o 
  -1   4   4      364.20      514.23     15.80 o 
   0   4   4    12963.39    11827.83    143.62 o 
   1   4   4      250.14      275.64      8.86 o 
   2   4   4     5499.44     5932.59    104.08 o 
   3   4   4     6815.87     6758.52    114.95 o 
   4   4   4      206.20      237.16      8.56 o 
   5   4   4     1116.63     1043.55     28.67 o 
   6   4   4       65.36       69.14      7.84 o 
   7   4   4      430.30      354.94     40.51 o 
   8   4   4        1.96        0.29     14.80 o 
   9   4   4      921.30     1027.43     66.13 o 
  10   4   4        1.47       26.37     11.20 o 
  11   4   4        8.18       22.72     10.10 o 
  -9   5   4        8.99       24.28     11.42 o 
  -8   5   4      513.62      425.36     17.88 o 
  -7   5   4      115.93       82.90     10.91 o 
  -6   5   4       25.75       32.59      6.26 o 
  -5   5   4      240.74      257.38     12.65 o 
  -4   5   4     1046.11      987.28     32.43 o 
  -3   5   4      174.03      282.60      9.14 o 
  -2   5   4      974.81     1182.22     29.72 o 
  -1   5   4    16901.14    15362.49    223.61 o 
   0   5   4     1478.63     1370.54     35.19 o 
   1   5   4       60.66      109.95      5.18 o 
   2   5   4     3522.54     4512.97     92.40 o 
   3   5   4     7562.84     8190.75    121.34 o 
   4   5   4     1565.41     1245.39     74.21 o 
   5   5   4      362.19      329.46     30.52 o 
   6   5   4     3627.75     3587.91    146.61 o 
   7   5   4      149.70      242.13     10.08 o 
   8   5   4      615.99      673.22     38.43 o 
   9   5   4        2.12       99.64      7.52 o 
  10   5   4      117.53      152.88     29.06 o 
  11   5   4        5.47       24.88     19.71 o 
  -8   6   4        0.27       19.84     12.15 o 
  -7   6   4      731.81      795.80     28.44 o 
  -6   6   4      151.83      105.01      7.45 o 
  -5   6   4      460.60      472.13     11.98 o 
  -4   6   4     2234.44     2265.06     71.17 o 
  -3   6   4      782.52     1003.63     25.44 o 
  -2   6   4      359.48      398.94     11.81 o 
  -1   6   4      181.96      169.32      7.13 o 
   0   6   4     4199.80     4322.13     84.85 o 
   1   6   4       93.03       34.84      6.21 o 
   2   6   4     2073.31     2012.84     61.39 o 
   3   6   4     5668.70     6076.44    112.30 o 
   4   6   4      161.40      127.61     14.53 o 
   5   6   4     2891.19     2869.44     82.36 o 
   6   6   4      261.13      257.88     24.32 o 
   7   6   4      128.93      224.10     26.16 o 
   8   6   4        1.09       -4.71      6.58 o 
   9   6   4      328.48      358.63     11.28 o 
  10   6   4       58.09       81.96     18.52 o 
  11   6   4       48.01       43.66     12.36 o 
  -8   7   4      140.61      140.41     30.39 o 
  -7   7   4        2.91       -0.76     11.93 o 
  -6   7   4      509.60      512.77     17.66 o 
  -5   7   4      310.36      312.25      9.59 o 
  -4   7   4      145.49      153.88     10.71 o 
  -3   7   4      854.27      966.56     26.88 o 
  -2   7   4      381.45      429.31     11.58 o 
  -1   7   4     5010.33     4393.66    122.33 o 
   0   7   4       16.66       17.63      6.92 o 
   1   7   4      415.95      401.33     10.78 o 
   2   7   4     1516.33     1328.21     44.40 o 
   3   7   4      238.38      152.85      6.94 o 
   4   7   4      397.24      365.70     12.75 o 
   5   7   4       10.36        4.82      5.15 o 
   6   7   4     2140.27     2233.77    155.71 o 
   7   7   4       11.65       12.17     12.35 o 
   8   7   4      622.96      559.04     26.74 o 
   9   7   4       32.23       44.78     15.01 o 
  10   7   4      120.65      113.67     38.67 o 
  11   7   4        7.87       39.42     28.88 o 
  -7   8   4       80.55       82.72     14.44 o 
  -6   8   4       20.18        9.41     20.97 o 
  -5   8   4      449.62      463.42     35.43 o 
  -4   8   4      164.50      164.98      8.05 o 
  -3   8   4      228.97      272.04     10.48 o 
  -2   8   4      647.75      587.90     15.31 o 
  -1   8   4       37.84       31.00      9.38 o 
   0   8   4     1602.03     1574.76     44.98 o 
   1   8   4      778.30      924.25     32.70 o 
   2   8   4     1119.99      982.39     25.68 o 
   3   8   4      401.43      350.52     14.49 o 
   4   8   4      115.29      182.91      8.90 o 
   5   8   4     1034.22      984.80     28.31 o 
   6   8   4      100.45       95.07      7.84 o 
   7   8   4       82.80      122.75     17.67 o 
   8   8   4       42.81       73.30      8.04 o 
   9   8   4      783.73      786.94     57.43 o 
  10   8   4      136.18      133.56     17.77 o 
  11   8   4       20.93       16.59     13.34 o 
  -6   9   4        9.72       16.61     10.15 o 
  -5   9   4      551.65      551.07     18.76 o 
  -4   9   4      111.37      112.31     11.37 o 
  -3   9   4       16.77       41.99      7.16 o 
  -2   9   4       42.24       58.71      9.38 o 
  -1   9   4     2892.48     3078.39     51.95 o 
   0   9   4       96.55      124.20      9.75 o 
   1   9   4      269.40      266.04      9.09 o 
   2   9   4     1788.16     1491.77     40.46 o 
   3   9   4       59.78       51.08      5.93 o 
   4   9   4       19.15       67.55      7.91 o 
   5   9   4      398.32      348.62     10.89 o 
   6   9   4      703.79      674.10     42.36 o 
   7   9   4       75.47       55.90     11.49 o 
   8   9   4      719.26      698.73     20.53 o 
   9   9   4      246.25      271.32     48.22 o 
  10   9   4       43.00       76.73     13.19 o 
  -6  10   4        1.36       18.45      9.96 o 
  -5  10   4      196.18      230.84     13.86 o 
  -4  10   4     1506.10     1595.02     54.97 o 
  -3  10   4      126.60      114.59     33.73 o 
  -2  10   4      115.62      123.15      6.77 o 
  -1  10   4      156.48      120.48     14.90 o 
   0  10   4       95.82      115.91      6.72 o 
   1  10   4       18.44        9.72     10.71 o 
   2  10   4     1143.78     1122.00     36.35 o 
   3  10   4      279.74      321.34     14.32 o 
   4  10   4      133.89      153.81      9.62 o 
   5  10   4     2625.56     2419.19     53.44 o 
   6  10   4        7.51       10.02      5.66 o 
   7  10   4       91.53       44.15     17.46 o 
   8  10   4       62.98       75.66     13.09 o 
   9  10   4      393.18      460.66     29.29 o 
  10  10   4       60.51       45.78     12.69 o 
  -5  11   4      177.81      162.82     13.31 o 
  -4  11   4      105.52       76.91     11.29 o 
  -3  11   4       36.41       31.91      9.55 o 
  -2  11   4       11.68       20.58     11.90 o 
  -1  11   4      282.28      328.24      9.21 o 
   0  11   4       23.82       17.13      4.81 o 
   1  11   4      283.38      307.57      9.38 o 
   2  11   4      247.80      194.66      8.99 o 
   3  11   4      289.22      305.84     13.37 o 
   4  11   4      227.37      188.50     21.25 o 
   5  11   4       65.52       58.90      9.48 o 
   6  11   4      497.21      538.49     51.56 o 
   7  11   4       11.40       18.51      9.72 o 
   8  11   4       23.56        4.36     11.80 o 
   9  11   4      238.93      292.18     33.90 o 
  -3  12   4        1.14       -5.07      9.94 o 
  -2  12   4      428.00      433.21     29.23 o 
  -1  12   4      148.41      140.21     14.05 o 
   0  12   4        2.57       11.24      6.99 o 
   1  12   4      173.30      161.88     12.86 o 
   2  12   4      519.88      513.54     15.82 o 
   3  12   4      930.41      985.17     24.49 o 
   4  12   4        0.04       10.49      7.49 o 
   5  12   4     1085.18     1083.63     23.23 o 
   6  12   4       71.70      126.75     20.46 o 
   7  12   4        4.28       -5.12     11.03 o 
   8  12   4      210.19      203.81     17.32 o 
   9  12   4      268.36      284.85     18.11 o 
  -2  13   4        0.60       -3.91      8.39 o 
  -1  13   4      451.11      462.48     17.50 o 
   0  13   4       31.65       38.69     10.25 o 
   1  13   4      554.90      553.81     18.42 o 
   2  13   4      311.15      274.85     27.49 o 
   3  13   4      129.54       96.50     11.28 o 
   4  13   4      114.65      146.32     14.90 o 
   5  13   4        8.41       19.45     10.06 o 
   6  13   4      325.38      315.31     35.26 o 
   7  13   4        1.30        3.99     14.24 o 
   8  13   4      179.27      144.73     15.40 o 
   0  14   4        9.07       13.10     11.61 o 
   1  14   4       37.10       98.29     12.15 o 
   2  14   4      183.70      184.13     13.97 o 
   3  14   4       87.94       97.92     14.22 o 
   4  14   4        0.67       14.28      7.88 o 
   5  14   4      400.15      454.18     17.74 o 
   6  14   4       20.93       24.75     10.35 o 
  -4 -14   5      119.44      116.00     15.23 o 
  -3 -14   5       15.09       -5.62     11.25 o 
  -2 -14   5       20.03       46.37     10.40 o 
  -1 -14   5       14.46       47.23     10.57 o 
   0 -14   5      204.72      209.78     25.07 o 
  -6 -13   5      152.81      189.11     28.71 o 
  -5 -13   5        6.22       24.00     11.12 o 
  -4 -13   5       37.72       37.76     11.32 o 
  -3 -13   5       88.18       76.32     10.57 o 
  -2 -13   5      142.22      134.47     13.02 o 
  -1 -13   5      416.35      381.32     16.39 o 
   0 -13   5       60.07       84.83     11.66 o 
   1 -13   5        0.00       -6.00      8.95 o 
   2 -13   5        0.52       -3.02     14.87 o 
  -8 -12   5       23.32       32.26     10.56 o 
  -7 -12   5      146.26      166.06     19.54 o 
  -6 -12   5      126.59      115.41     14.36 o 
  -5 -12   5      326.90      304.39     22.37 o 
  -4 -12   5      557.70      547.88     20.35 o 
  -3 -12   5        2.11       -8.36     10.61 o 
  -2 -12   5      227.60      211.09     28.34 o 
  -1 -12   5      190.79      158.83     12.74 o 
   0 -12   5      268.36      301.62     13.83 o 
   1 -12   5       32.24       50.61      9.75 o 
   2 -12   5      309.43      295.72     14.23 o 
   3 -12   5       75.31       80.63     12.02 o 
  -8 -11   5      392.00      346.35     18.89 o 
  -7 -11   5       18.67        9.55     12.91 o 
  -6 -11   5       53.27       51.40     12.27 o 
  -5 -11   5      225.68      218.52     27.21 o 
  -4 -11   5      283.95      261.65     35.81 o 
  -3 -11   5       28.65       25.61      5.85 o 
  -2 -11   5       18.16       15.14      4.89 o 
  -1 -11   5      259.17      281.83     21.35 o 
   0 -11   5       32.85       30.97      4.80 o 
   1 -11   5       10.41       17.03     15.82 o 
   2 -11   5       44.01       35.40      9.63 o 
   3 -11   5      248.20      287.10     14.79 o 
   4 -11   5        0.12       -9.41     12.06 o 
   5 -11   5       76.28      111.46     13.78 o 
  -9 -10   5        0.27        0.27     10.35 o 
  -8 -10   5        4.99        0.18     10.02 o 
  -7 -10   5      357.85      333.28     15.77 o 
  -6 -10   5        9.95       10.05      9.04 o 
  -5 -10   5      516.68      518.96     12.89 o 
  -4 -10   5      380.51      412.58     11.71 o 
  -3 -10   5      489.47      467.56     12.27 o 
  -2 -10   5     1122.91     1173.34     32.59 o 
  -1 -10   5       72.03       49.98      5.87 o 
   0 -10   5     1438.29     1376.39     78.71 o 
   1 -10   5      121.57      120.00      6.87 o 
   2 -10   5      289.13      300.53      9.07 o 
   3 -10   5     1333.40     1290.59     26.67 o 
   4 -10   5       15.19       -3.24      9.55 o 
   5 -10   5      526.24      555.95     36.97 o 
   6 -10   5        0.07       -0.02     11.25 o 
  -9  -9   5        7.35       13.84     11.98 o 
  -8  -9   5      661.72      593.16     38.81 o 
  -7  -9   5      254.41      290.10     18.69 o 
  -6  -9   5        9.96       -6.59     13.74 o 
  -5  -9   5     1724.36     1602.51     34.28 o 
  -4  -9   5      267.30      210.49     24.76 o 
  -3  -9   5      330.45      311.49     10.10 o 
  -2  -9   5       13.13       -5.00      5.14 o 
  -1  -9   5     3202.11     3125.74     79.05 o 
   0  -9   5      287.75      313.78      9.69 o 
   1  -9   5        1.68        6.73      4.80 o 
   2  -9   5      419.94      503.69     15.35 o 
   3  -9   5      277.37      285.32      9.21 o 
   4  -9   5       64.76       41.16      7.13 o 
   5  -9   5      141.58      134.26     23.91 o 
   6  -9   5      441.43      482.17     19.25 o 
   7  -9   5        1.70        8.58     10.53 o 
 -10  -8   5        2.70      -10.46     10.46 o 
  -9  -8   5      152.58      172.69     36.29 o 
  -8  -8   5      227.68      215.92     13.26 o 
  -7  -8   5      330.85      327.61     22.95 o 
  -6  -8   5      576.76      498.30     34.07 o 
  -5  -8   5       68.07      106.22      8.39 o 
  -4  -8   5     1235.72     1446.08     40.46 o 
  -3  -8   5      107.87       90.28     18.38 o 
  -2  -8   5       40.55       97.59     10.47 o 
  -1  -8   5      568.59      587.88     41.16 o 
   0  -8   5     1325.42     1351.50     40.96 o 
   1  -8   5      118.38      105.74      6.66 o 
   2  -8   5      494.65      546.88     12.63 o 
   3  -8   5      869.51      845.22     32.50 o 
   4  -8   5        8.99       10.13      5.14 o 
   5  -8   5     1753.35     1946.80     28.81 o 
   6  -8   5       44.42       54.27     10.15 o 
   7  -8   5       74.19       84.02     17.36 o 
 -10  -7   5        2.61       -5.30     23.02 o 
  -9  -7   5        3.12        1.00     14.53 o 
  -8  -7   5      559.85      601.40     46.86 o 
  -7  -7   5      505.83      466.74     12.11 o 
  -6  -7   5      216.22      256.06     39.73 o 
  -5  -7   5     1397.06     1436.73     40.21 o 
  -4  -7   5     1635.75     1577.81     90.17 o 
  -3  -7   5      595.52      666.86     18.85 o 
  -2  -7   5      229.62      329.86      9.51 o 
  -1  -7   5     1372.52     1248.96     34.50 o 
   0  -7   5       68.07       65.00      7.03 o 
   1  -7   5     1415.35     1499.32     47.17 o 
   2  -7   5     1343.35     1341.19     40.24 o 
   3  -7   5      382.14      416.95     12.86 o 
   4  -7   5     1062.98     1035.00     30.90 o 
   5  -7   5        0.70        3.22      5.93 o 
   6  -7   5      890.62      867.91     38.02 o 
   7  -7   5        7.09       21.66     17.09 o 
   8  -7   5       42.80       47.33     15.14 o 
 -10  -6   5       63.90       64.93     14.09 o 
  -9  -6   5      843.53      853.47     32.57 o 
  -8  -6   5       81.66       61.09      6.99 o 
  -7  -6   5     1367.87     1163.79     31.10 o 
  -6  -6   5       23.86       24.34      6.11 o 
  -5  -6   5      314.24      389.83     11.14 o 
  -4  -6   5     2196.21     2193.40     89.49 o 
  -3  -6   5        7.65       -2.11      5.93 o 
  -2  -6   5        9.51       85.56      6.97 o 
  -1  -6   5      381.00      399.91     23.77 o 
   0  -6   5     1610.44     1805.23     54.88 o 
   1  -6   5     1427.35     1307.80     37.38 o 
   2  -6   5     2188.65     2223.60     55.00 o 
   3  -6   5     1568.98     1571.60     45.12 o 
   4  -6   5       90.65       93.93      7.41 o 
   5  -6   5      434.80      431.76     15.93 o 
   6  -6   5       63.85       82.80      7.13 o 
   7  -6   5       66.43       40.39     12.04 o 
   8  -6   5        0.42       34.29     14.39 o 
   9  -6   5      114.30      137.85     15.04 o 
 -10  -5   5        2.64       -6.05     11.16 o 
  -9  -5   5      298.54      300.42     17.10 o 
  -8  -5   5     1073.75      963.00     31.37 o 
  -7  -5   5      395.66      452.81     12.99 o 
  -6  -5   5      208.74      231.70     26.70 o 
  -5  -5   5      452.33      480.67     14.36 o 
  -4  -5   5        6.14        4.22      4.76 o 
  -3  -5   5      588.44      454.35     24.04 o 
  -2  -5   5      700.91      982.27     34.31 o 
  -1  -5   5     4345.99     4410.19     89.51 o 
   0  -5   5       11.14        9.46      3.74 o 
   1  -5   5     5445.54     5535.08    191.52 o 
   2  -5   5     2259.03     2464.46     89.52 o 
   3  -5   5      434.20      453.03     12.60 o 
   4  -5   5      450.79      442.10     15.01 o 
   5  -5   5      507.47      470.46     14.60 o 
   6  -5   5     1227.29     1337.52     76.49 o 
   7  -5   5       24.10        6.74      6.08 o 
   8  -5   5      523.02      569.95     19.88 o 
   9  -5   5      459.80      450.73     18.64 o 
 -10  -4   5        6.38       28.91     13.39 o 
  -9  -4   5      116.99      164.03     12.90 o 
  -8  -4   5     1006.44     1004.21     45.77 o 
  -7  -4   5       66.97       94.41      7.52 o 
  -6  -4   5        6.64        5.35      5.62 o 
  -5  -4   5      183.33      202.34     14.63 o 
  -4  -4   5     1341.17     1364.50     34.79 o 
  -3  -4   5     1971.61     2006.12     61.10 o 
  -2  -4   5    12169.62    13108.15    152.32 o 
  -1  -4   5      224.00      207.86     13.23 o 
   0  -4   5      613.34      600.16     16.99 o 
   1  -4   5     3329.47     3193.12     96.85 o 
   2  -4   5     1633.93     1618.75     43.71 o 
   3  -4   5     1076.72      878.59     25.66 o 
   4  -4   5      101.99      139.40      8.01 o 
   5  -4   5      663.46      715.59     20.64 o 
   6  -4   5       81.33       76.40      7.01 o 
   7  -4   5       73.77       72.51     17.67 o 
   8  -4   5      176.22      169.17     31.95 o 
   9  -4   5      104.41      122.53     14.52 o 
  10  -4   5       15.83       40.01     11.90 o 
 -10  -3   5       29.47       10.39     18.59 o 
  -9  -3   5        0.51       -2.89      8.79 o 
  -8  -3   5      413.38      411.52     12.20 o 
  -7  -3   5      152.36      127.15      8.14 o 
  -6  -3   5      492.51      492.33     18.89 o 
  -5  -3   5     2705.65     2771.96     66.21 o 
  -4  -3   5       23.94        8.17      4.81 o 
  -3  -3   5     1043.72     1083.56     30.80 o 
  -2  -3   5      293.70      833.67     32.19 o 
  -1  -3   5     7487.91     7287.15    113.93 o 
   0  -3   5       46.12       32.55      3.54 o 
   1  -3   5     1726.44     1562.89     40.58 o 
   2  -3   5      516.37      389.21     12.03 o 
   3  -3   5       82.21       94.29      7.95 o 
   4  -3   5      265.59      247.49     12.92 o 
   5  -3   5       87.56      114.63     13.47 o 
   6  -3   5      399.35      335.95     10.13 o 
   7  -3   5      377.48      391.68     18.65 o 
   8  -3   5      505.39      470.69     15.31 o 
   9  -3   5      450.13      503.25     35.36 o 
  10  -3   5       13.25       12.04     11.32 o 
 -10  -2   5       35.55       21.37     12.41 o 
  -9  -2   5       32.55       50.43      9.24 o 
  -8  -2   5       87.76       89.48      9.65 o 
  -7  -2   5      865.10      871.88     22.87 o 
  -6  -2   5      355.82      331.36     18.11 o 
  -5  -2   5     1815.89     1853.32     57.85 o 
  -4  -2   5      220.76      230.95      7.96 o 
  -3  -2   5      235.99      268.42     31.27 o 
  -2  -2   5    21816.28    20924.71    275.31 o 
  -1  -2   5      495.55      699.62     32.53 o 
   0  -2   5     6073.02     6817.06    168.60 o 
   1  -2   5      162.51      206.32      5.64 o 
   2  -2   5      454.86      347.79     10.67 o 
   3  -2   5     4014.88     3929.08    194.21 o 
   4  -2   5       86.79      117.14      7.71 o 
   5  -2   5     7619.74     7505.93    120.62 o 
   6  -2   5      189.81      186.09      8.63 o 
   7  -2   5     1141.80     1238.56     36.56 o 
   8  -2   5      169.89      148.61      8.39 o 
   9  -2   5      333.78      332.69     22.06 o 
  10  -2   5       52.24       46.01     12.25 o 
 -10  -1   5       30.72       62.68     18.14 o 
  -9  -1   5        3.75       14.91      9.47 o 
  -8  -1   5      400.31      337.92     14.66 o 
  -7  -1   5        2.21       15.65      6.75 o 
  -6  -1   5      867.55      795.71     22.80 o 
  -5  -1   5     4155.26     4002.94     81.77 o 
  -4  -1   5       60.71       45.22      5.74 o 
  -3  -1   5     7314.59     7223.81    117.53 o 
  -2  -1   5      622.60      659.51     18.86 o 
  -1  -1   5     9537.24     8642.68    114.00 o 
   0  -1   5    17228.21    20081.46    195.00 o 
   1  -1   5      211.04      227.50      7.17 o 
   2  -1   5     1970.12     1774.45     68.41 o 
   3  -1   5      162.71      138.95      7.54 o 
   4  -1   5     3803.34     3747.36    112.06 o 
   5  -1   5        0.62       36.72      6.27 o 
   6  -1   5      474.24      363.40     10.66 o 
   7  -1   5      184.95       57.91     15.01 o 
   8  -1   5      799.40      862.34     29.29 o 
   9  -1   5      220.77      238.56     13.69 o 
  10  -1   5        0.51       14.55     11.10 o 
  11  -1   5      179.59      157.02     24.45 o 
 -10   0   5        2.94       -3.49     10.84 o 
  -9   0   5      548.43      516.20     19.78 o 
  -8   0   5      603.00      563.16     14.56 o 
  -7   0   5       12.10       15.48     35.81 o 
  -6   0   5     3864.45     3746.46     68.05 o 
  -5   0   5     2705.15     2783.78    110.02 o 
  -4   0   5       44.72       39.99      5.09 o 
  -3   0   5      688.33      966.90     26.80 o 
  -2   0   5     5249.08     5686.07     99.93 o 
  -1   0   5      182.96      140.72      4.62 o 
   0   0   5       19.40       25.37      2.87 o 
   1   0   5      310.95      289.45      8.68 o 
   2   0   5     4922.95     5016.47     90.25 o 
   3   0   5     2295.11     2258.48    126.32 o 
   4   0   5      176.71      163.12      7.17 o 
   5   0   5     7125.68     7997.02    118.05 o 
   6   0   5      173.91      195.77      9.09 o 
   7   0   5     1072.25     1130.68     46.28 o 
   8   0   5     1102.78     1016.67     29.58 o 
   9   0   5      101.87       81.65      7.21 o 
  10   0   5       22.61        3.00     12.83 o 
  11   0   5        5.10       14.32     14.46 o 
 -10   1   5       17.18       26.54     10.44 o 
  -9   1   5       55.26       62.28     10.94 o 
  -8   1   5      208.29      202.62      9.26 o 
  -7   1   5       13.53       12.61      6.01 o 
  -6   1   5      137.74      111.05      8.29 o 
  -5   1   5     9964.61    10814.77    122.21 o 
  -4   1   5      671.17      535.42     17.63 o 
  -3   1   5      249.90      197.94      6.87 o 
  -2   1   5      236.13      321.06     11.73 o 
  -1   1   5      812.22      784.63     20.28 o 
   0   1   5    14228.63    17050.18    211.61 o 
   1   1   5     3381.77     3210.55    110.56 o 
   2   1   5     8944.52     8826.88    117.16 o 
   3   1   5      969.50      917.91     24.23 o 
   4   1   5     5794.69     5987.41    525.73 o 
   5   1   5      428.17      602.11     55.76 o 
   6   1   5      836.40      845.86     46.00 o 
   7   1   5      537.58      748.38     67.08 o 
   8   1   5      201.64      198.64     16.64 o 
   9   1   5      321.95      354.13     46.69 o 
  10   1   5        1.99       15.55     21.59 o 
  11   1   5      231.79      240.43     16.23 o 
 -10   2   5        1.73       -5.52     12.20 o 
  -9   2   5      335.11      338.78     21.79 o 
  -8   2   5      550.30      584.10     36.83 o 
  -7   2   5      393.00      340.34     31.85 o 
  -6   2   5      946.28      892.28     63.43 o 
  -5   2   5      407.64      402.14     12.84 o 
  -4   2   5       13.72       35.39      8.18 o 
  -3   2   5      739.07      673.43     22.85 o 
  -2   2   5      534.86      387.77     13.36 o 
  -1   2   5      284.51      296.43      8.99 o 
   0   2   5     1919.00     3465.57    309.35 o 
   1   2   5     3644.83     3419.13     82.60 o 
   2   2   5    11070.58    11341.89    136.14 o 
   3   2   5      269.52      394.63    213.45 o 
   4   2   5     1439.79     1353.56     36.63 o 
   5   2   5     3582.41     3133.24     76.90 o 
   6   2   5      446.92      384.74     11.64 o 
   7   2   5      196.15      194.48     10.40 o 
   8   2   5     1360.91     1367.38     38.43 o 
   9   2   5       32.70       39.65      7.09 o 
  10   2   5      290.03      279.51     17.23 o 
  11   2   5        2.26        4.06     13.00 o 
  -9   3   5      303.05      298.32     16.00 o 
  -8   3   5      411.61      397.05     18.46 o 
  -7   3   5      381.49      398.56     12.12 o 
  -6   3   5        1.99        7.91      5.49 o 
  -5   3   5     2011.55     2228.97     90.92 o 
  -4   3   5       80.95       84.07     10.91 o 
  -3   3   5      135.19       85.13     16.85 o 
  -2   3   5      533.44      422.99     29.53 o 
  -1   3   5     4279.65     4244.41    144.32 o 
   0   3   5      150.90      273.89     14.29 o 
   1   3   5     6314.26     6816.14    135.25 o 
   2   3   5     3896.11     3671.50     81.79 o 
   3   3   5       54.10      103.81     58.69 o 
   4   3   5     8127.57     7263.58    125.19 o 
   5   3   5      453.13      512.89     31.41 o 
   6   3   5       85.83       88.30     19.47 o 
   7   3   5      704.06     1047.53     25.67 o 
   8   3   5     1065.15     1009.13     33.37 o 
   9   3   5       36.78       24.89      8.18 o 
  10   3   5        2.90        5.54      9.89 o 
  11   3   5      474.84      444.25     19.46 o 
  -9   4   5      393.44      351.41     17.60 o 
  -8   4   5      535.02      532.66     18.86 o 
  -7   4   5       46.72       22.14     16.71 o 
  -6   4   5      245.98      235.25      9.15 o 
  -5   4   5      196.40      182.17     13.57 o 
  -4   4   5       29.45       17.50      4.58 o 
  -3   4   5      448.74      675.32    135.05 o 
  -2   4   5     1464.02     1468.85     36.58 o 
  -1   4   5     2177.87     2141.08     67.69 o 
   0   4   5     2776.25     2978.00     77.17 o 
   1   4   5     7184.44     6918.64    114.41 o 
   2   4   5      268.02      563.46     16.42 o 
   3   4   5      490.10      376.43     12.39 o 
   4   4   5       71.42       85.48      7.26 o 
   5   4   5     1995.77     2117.06     72.60 o 
   6   4   5      102.58       85.04      9.65 o 
   7   4   5      159.49      171.73     24.25 o 
   8   4   5     2557.75     2421.70     59.85 o 
   9   4   5       29.33       72.31      8.04 o 
  10   4   5      131.62      136.56     15.53 o 
  11   4   5       14.27        9.03     10.94 o 
  -9   5   5      212.48      216.69     16.83 o 
  -8   5   5       27.75       18.58     10.70 o 
  -7   5   5       48.45       57.50     11.00 o 
  -6   5   5      563.42      523.02     12.41 o 
  -5   5   5       11.01        4.14      5.52 o 
  -4   5   5      269.54      286.02      9.38 o 
  -3   5   5      702.13      700.07     33.05 o 
  -2   5   5     3453.84     3516.02     71.59 o 
  -1   5   5      841.90      795.76     30.25 o 
   0   5   5     3063.28     2916.23     72.44 o 
   1   5   5      134.74      125.35      7.20 o 
   2   5   5     2632.59     2772.36     72.15 o 
   3   5   5     1015.34     1425.82     88.43 o 
   4   5   5     7429.98     7562.27    122.62 o 
   5   5   5       93.62       68.86      7.53 o 
   6   5   5        4.92        0.72      6.71 o 
   7   5   5      905.34      983.66     23.28 o 
   8   5   5      446.33      400.14     11.93 o 
   9   5   5      165.52      132.36     22.30 o 
  10   5   5       32.79       39.76     12.85 o 
  11   5   5      330.21      313.86     19.24 o 
  -8   6   5       93.86       82.83     12.22 o 
  -7   6   5        1.44        6.56     10.61 o 
  -6   6   5      460.53      432.45     11.28 o 
  -5   6   5      129.70      129.50     20.80 o 
  -4   6   5       10.86       27.91      8.76 o 
  -3   6   5     1154.47     1346.92    133.68 o 
  -2   6   5     3796.52     3621.83     68.82 o 
  -1   6   5        9.07       -1.49     21.31 o 
   0   6   5     1715.43     1792.23     56.13 o 
   1   6   5     6450.77     5415.73    176.92 o 
   2   6   5      263.77      443.80     16.81 o 
   3   6   5      167.73      211.68      7.88 o 
   4   6   5     1371.17     1411.92     55.35 o 
   5   6   5      235.42      228.15      9.65 o 
   6   6   5       61.77       60.14     14.49 o 
   7   6   5      933.36      811.96     17.89 o 
   8   6   5      174.12      188.44     31.31 o 
   9   6   5        0.21       41.20      6.99 o 
  10   6   5      173.17      167.73     14.25 o 
  11   6   5        1.66        6.65     12.48 o 
  -8   7   5       10.26       -2.43     11.23 o 
  -7   7   5        9.60       12.22      9.77 o 
  -6   7   5       24.00       27.28      9.69 o 
  -5   7   5      351.81      344.32      9.91 o 
  -4   7   5      543.43      502.18     12.83 o 
  -3   7   5     1786.45     1776.93     39.95 o 
  -2   7   5     1212.59     1205.56     38.95 o 
  -1   7   5      342.11      272.85     29.33 o 
   0   7   5      980.62      919.38     23.55 o 
   1   7   5       36.36       46.72      4.77 o 
   2   7   5       39.05       42.54      5.25 o 
   3   7   5       22.08       27.93      9.38 o 
   4   7   5     2965.63     3088.37     67.16 o 
   5   7   5      823.74      809.56     35.84 o 
   6   7   5      126.95      119.17      7.74 o 
   7   7   5      207.06      232.10     10.46 o 
   8   7   5       20.92       16.46      6.51 o 
   9   7   5        0.45       15.80      8.73 o 
  10   7   5       10.97        6.79     11.38 o 
  11   7   5      443.90      442.78     41.78 o 
  -7   8   5        4.78        9.09     11.59 o 
  -6   8   5      498.72      491.32     17.24 o 
  -5   8   5       50.97       66.57     11.21 o 
  -4   8   5      122.40      114.84      7.02 o 
  -3   8   5      439.92      488.95     45.77 o 
  -2   8   5      289.80      331.66      9.82 o 
  -1   8   5       35.16       45.14      7.30 o 
   0   8   5      501.76      537.44     13.60 o 
   1   8   5     2808.29     3021.88     60.73 o 
   2   8   5      149.72      104.81     13.27 o 
   3   8   5      348.37      322.18     15.79 o 
   4   8   5        1.53       47.23      9.62 o 
   5   8   5     1488.10     1565.10     44.54 o 
   6   8   5      101.31       61.89     10.16 o 
   7   8   5     1155.54     1043.06     61.62 o 
   8   8   5      335.18      395.69     43.89 o 
   9   8   5       18.62       43.46     10.11 o 
  10   8   5      225.35      201.78     17.74 o 
  11   8   5        2.83      -12.34     12.34 o 
  -6   9   5        1.21       -6.87      9.04 o 
  -5   9   5      556.62      532.59     18.01 o 
  -4   9   5      172.20      135.06     50.51 o 
  -3   9   5      960.36      973.03     34.65 o 
  -2   9   5      321.94      348.59     10.07 o 
  -1   9   5       38.82       55.93      6.12 o 
   0   9   5     1150.03     1088.42     32.17 o 
   1   9   5      132.16      154.16     15.01 o 
   2   9   5       22.77        8.90      5.90 o 
   3   9   5      100.27      135.09     11.59 o 
   4   9   5     3222.03     3362.21     56.64 o 
   5   9   5       16.38        7.56      6.48 o 
   6   9   5        2.04       -1.60      5.73 o 
   7   9   5      468.30      377.31     12.47 o 
   8   9   5       88.11       78.69     11.30 o 
   9   9   5      110.62       98.52     12.60 o 
  10   9   5        0.07      -11.31     11.31 o 
  -5  10   5        6.19       -7.93     19.51 o 
  -4  10   5      320.28      274.33     14.91 o 
  -3  10   5      768.29      759.89     27.59 o 
  -2  10   5      196.43      202.56     12.55 o 
  -1  10   5        0.92        6.04      5.11 o 
   0  10   5      382.07      384.42     10.24 o 
   1  10   5     1199.55     1247.78     55.69 o 
   2  10   5      126.57      122.41      7.78 o 
   3  10   5      289.86      317.92     10.05 o 
   4  10   5       80.18      190.69      8.41 o 
   5  10   5       21.51       37.06      6.38 o 
   6  10   5        5.80       15.40     29.02 o 
   7  10   5      400.97      440.37     16.21 o 
   8  10   5      258.91      244.04     31.20 o 
   9  10   5        0.55       11.41     10.62 o 
  10  10   5      388.33      367.28     19.87 o 
  -4  11   5        0.91        0.06     38.60 o 
  -3  11   5      365.80      374.83     23.91 o 
  -2  11   5       96.14       98.87     10.84 o 
  -1  11   5        1.07        6.00      6.41 o 
   0  11   5      179.00      191.49      7.68 o 
   1  11   5        1.80       -4.33      4.33 o 
   2  11   5      546.89      470.73     11.70 o 
   3  11   5       10.99        5.69      5.45 o 
   4  11   5      788.58      818.86     23.43 o 
   5  11   5       33.64       40.17     10.81 o 
   6  11   5      505.26      540.84     47.88 o 
   7  11   5      436.41      404.32     16.78 o 
   8  11   5       58.78       45.90     11.81 o 
   9  11   5       19.93       30.46     11.16 o 
  -3  12   5       75.10       91.85     11.23 o 
  -2  12   5      102.67      114.41     15.24 o 
  -1  12   5      180.13      214.90     12.85 o 
   0  12   5       70.73       87.46     10.09 o 
   1  12   5       67.80       52.12      8.62 o 
   2  12   5       81.58      112.21     11.28 o 
   3  12   5      753.37      721.92     19.05 o 
   4  12   5      142.58      154.66     27.73 o 
   5  12   5       33.10       14.53      9.03 o 
   6  12   5      253.70      357.61     29.91 o 
   7  12   5       28.14       12.72     11.42 o 
   8  12   5      135.07      143.75     24.72 o 
  -2  13   5       17.19       22.03      9.59 o 
  -1  13   5        2.21        7.58     14.60 o 
   0  13   5      780.21      751.49     20.40 o 
   1  13   5        4.51       43.79     11.24 o 
   2  13   5        5.36       24.01      8.12 o 
   3  13   5       81.40       76.05     11.27 o 
   4  13   5      718.99      706.85     21.99 o 
   5  13   5       37.59       30.99      9.93 o 
   6  13   5       11.34        8.03     12.00 o 
   7  13   5      616.64      576.35     20.80 o 
   0  14   5        6.01       20.29      8.66 o 
   1  14   5      456.75      453.80     17.87 o 
   2  14   5        0.31       16.12      9.96 o 
   3  14   5      244.15      242.85     14.78 o 
   4  14   5      197.38      203.36     22.61 o 
   5  14   5        9.03        8.81      8.89 o 
   6  14   5      134.86      130.19     12.98 o 
  -3 -14   6        1.02       11.12      9.13 o 
  -2 -14   6      165.07      180.24     14.80 o 
  -1 -14   6       19.17        4.36     12.62 o 
  -6 -13   6       50.67       76.40     12.36 o 
  -5 -13   6      136.66      125.85     14.04 o 
  -4 -13   6       37.46       25.61     11.41 o 
  -3 -13   6      729.01      713.55     27.90 o 
  -2 -13   6      165.40      139.24     17.49 o 
  -1 -13   6       25.09       55.73     10.28 o 
   0 -13   6      152.46      166.89     12.69 o 
   1 -13   6       18.71       -5.73     22.00 o 
   2 -13   6       66.44       77.21     11.18 o 
  -7 -12   6      193.85      197.64     15.36 o 
  -6 -12   6      308.37      285.99     16.99 o 
  -5 -12   6        1.82       10.05      9.69 o 
  -4 -12   6       88.32       75.33     12.25 o 
  -3 -12   6      235.12      228.69     13.34 o 
  -2 -12   6      309.32      264.88     13.36 o 
  -1 -12   6       64.37       46.31     17.02 o 
   0 -12   6       94.42       98.77     13.33 o 
   1 -12   6      229.19      256.04     17.19 o 
   2 -12   6        4.60       -6.88      8.52 o 
   3 -12   6       68.93       78.53     11.03 o 
  -8 -11   6        0.38       -0.71     10.22 o 
  -7 -11   6       96.33      120.85     14.51 o 
  -6 -11   6       81.36       96.21     11.25 o 
  -5 -11   6      357.70      353.89     15.80 o 
  -4 -11   6       10.95       -4.08      8.49 o 
  -3 -11   6     1123.84     1109.85     69.54 o 
  -2 -11   6      157.69      200.90      8.12 o 
  -1 -11   6       28.99        0.35     25.00 o 
   0 -11   6       76.04       55.37      8.48 o 
   1 -11   6      250.68      242.77     12.56 o 
   2 -11   6      209.89      226.61     14.19 o 
   3 -11   6        9.75      -12.17     12.17 o 
   4 -11   6     1010.62     1060.90     25.00 o 
   5 -11   6       27.83       22.61     14.12 o 
  -9 -10   6      199.26      197.47     16.38 o 
  -8 -10   6        2.85        3.52     10.69 o 
  -7 -10   6       73.17       55.13     11.18 o 
  -6 -10   6      978.35      913.63     31.20 o 
  -5 -10   6      129.96      138.04     12.07 o 
  -4 -10   6      123.33      150.16     11.22 o 
  -3 -10   6      256.26      255.29      9.58 o 
  -2 -10   6      178.07      164.16     12.45 o 
  -1 -10   6      410.65      377.64     10.63 o 
   0 -10   6      244.74      236.30      8.70 o 
   1 -10   6      525.32      560.32     14.90 o 
   2 -10   6        2.70        1.74      4.39 o 
   3 -10   6      317.88      298.42     14.78 o 
   4 -10   6      304.06      283.98     18.65 o 
   5 -10   6      260.21      311.71     17.56 o 
   6 -10   6        6.53       15.28     12.11 o 
  -9  -9   6      138.79      177.74     19.13 o 
  -8  -9   6        5.81       18.39     10.42 o 
  -7  -9   6      329.96      328.08     18.18 o 
  -6  -9   6       33.78        7.51      6.54 o 
  -5  -9   6      158.89      121.32      7.90 o 
  -4  -9   6        5.21       -0.93      7.23 o 
  -3  -9   6        6.75       13.16      5.27 o 
  -2  -9   6      630.81      562.93     14.59 o 
  -1  -9   6       47.95       53.71     13.16 o 
   0  -9   6     1006.39      988.44     30.21 o 
   1  -9   6      112.26      134.64     13.71 o 
   2  -9   6      417.79      409.16     10.68 o 
   3  -9   6       21.95       10.29     10.54 o 
   4  -9   6     1119.89     1113.76     22.80 o 
   5  -9   6      115.74      143.01     15.24 o 
   6  -9   6       74.14       71.52     12.91 o 
 -10  -8   6       64.17       65.03     21.08 o 
  -9  -8   6       41.84       68.70     15.11 o 
  -8  -8   6      392.32      334.97     15.61 o 
  -7  -8   6        4.81       -6.00      6.00 o 
  -6  -8   6      747.77      805.87     30.73 o 
  -5  -8   6        8.64       29.33      6.43 o 
  -4  -8   6      583.99      711.97     38.23 o 
  -3  -8   6      367.51      285.44     12.24 o 
  -2  -8   6      873.05      767.33     17.48 o 
  -1  -8   6      248.91      241.67     22.10 o 
   0  -8   6     1106.67     1108.95     37.38 o 
   1  -8   6     2007.82     1841.32     84.03 o 
   2  -8   6       64.77       83.94     10.78 o 
   3  -8   6      683.44      692.95     15.21 o 
   4  -8   6      164.83      166.37      8.22 o 
   5  -8   6      205.51      231.94     20.87 o 
   6  -8   6      153.66      156.17     12.75 o 
   7  -8   6       52.43       35.11     12.22 o 
 -10  -7   6      114.88      133.71     13.35 o 
  -9  -7   6      104.49      142.27     18.28 o 
  -8  -7   6       75.58       68.26     18.35 o 
  -7  -7   6      624.85      684.23     38.60 o 
  -6  -7   6       20.61       21.00     10.40 o 
  -5  -7   6       12.22        8.87      6.55 o 
  -4  -7   6      236.47      212.66     25.61 o 
  -3  -7   6     2592.56     2469.30     54.16 o 
  -2  -7   6      260.76      250.86      8.73 o 
  -1  -7   6      429.29      432.17     12.75 o 
   0  -7   6     4032.27     4182.89     73.19 o 
   1  -7   6      228.17      246.21      8.90 o 
   2  -7   6      148.06      215.97      8.29 o 
   3  -7   6      167.51      294.42     11.00 o 
   4  -7   6      534.54      649.40     14.97 o 
   5  -7   6        6.29        5.18      5.45 o 
   6  -7   6      516.67      546.65     17.19 o 
   7  -7   6      125.57      125.08     14.97 o 
   8  -7   6        2.05        6.97     21.08 o 
 -10  -6   6      429.12      451.21     19.82 o 
  -9  -6   6       69.26       84.90     13.53 o 
  -8  -6   6        4.67        7.06      5.14 o 
  -7  -6   6       37.54      128.40     10.37 o 
  -6  -6   6     2066.06     2212.88     44.75 o 
  -5  -6   6      192.01      238.02      8.96 o 
  -4  -6   6     1068.59     1006.30     31.68 o 
  -3  -6   6     1332.72     1265.88     36.90 o 
  -2  -6   6      360.07      298.20      9.40 o 
  -1  -6   6       19.64       -0.11      3.66 o 
   0  -6   6     1137.42     1105.27     29.34 o 
   1  -6   6     1650.24     1510.36     39.25 o 
   2  -6   6      479.26      513.62     15.14 o 
   3  -6   6     2431.44     2736.38     56.09 o 
   4  -6   6      249.88      265.15      9.21 o 
   5  -6   6      102.70      102.31      7.45 o 
   6  -6   6      312.14      306.78     21.18 o 
   7  -6   6      220.75      249.31     15.43 o 
   8  -6   6      133.92      144.82     18.38 o 
 -10  -5   6       31.74       40.90     13.16 o 
  -9  -5   6      653.95      833.61     22.64 o 
  -8  -5   6       52.23       60.89      6.60 o 
  -7  -5   6      437.76      511.73     14.43 o 
  -6  -5   6       21.17       15.48      6.46 o 
  -5  -5   6      497.97      497.58     15.16 o 
  -4  -5   6       34.23       64.80      7.71 o 
  -3  -5   6     2393.65     2459.03     63.78 o 
  -2  -5   6     1702.85     1723.73     54.70 o 
  -1  -5   6        8.04       18.95     11.59 o 
   0  -5   6     6645.96     6939.17    107.18 o 
   1  -5   6      130.83      100.21      6.10 o 
   2  -5   6      657.24      626.61     18.95 o 
   3  -5   6       40.73      107.73      7.25 o 
   4  -5   6     2017.29     1657.09    115.44 o 
   5  -5   6      106.87      182.89     11.22 o 
   6  -5   6      336.63      376.53     10.58 o 
   7  -5   6      588.44      570.14     26.94 o 
   8  -5   6      141.33      158.94     13.48 o 
   9  -5   6       19.63       22.73     11.79 o 
 -10  -4   6      321.40      336.14     17.93 o 
  -9  -4   6        4.30       52.70     11.70 o 
  -8  -4   6        6.50        5.74      5.83 o 
  -7  -4   6        2.71       74.90     19.51 o 
  -6  -4   6     1019.32      864.19     21.10 o 
  -5  -4   6       19.47        4.35      8.13 o 
  -4  -4   6      978.37      865.54     28.24 o 
  -3  -4   6     6163.20     6426.77    244.96 o 
  -2  -4   6      351.54      917.47     26.88 o 
  -1  -4   6     2294.11     2311.87     66.74 o 
   0  -4   6       19.31       23.26      4.09 o 
   1  -4   6      859.99      749.84     20.88 o 
   2  -4   6       37.00       70.36      5.53 o 
   3  -4   6     3612.53     3566.38    139.65 o 
   4  -4   6        5.83       11.04      5.45 o 
   5  -4   6      243.17      223.89     17.84 o 
   6  -4   6       42.23       30.81      6.11 o 
   7  -4   6      485.35      499.19     14.46 o 
   8  -4   6      628.49      683.35     38.71 o 
   9  -4   6       50.96       80.38     13.23 o 
 -10  -3   6       29.66        6.85     12.64 o 
  -9  -3   6      349.54      336.22     18.14 o 
  -8  -3   6       54.54       81.08      7.88 o 
  -7  -3   6      830.01      860.71     20.69 o 
  -6  -3   6      106.37      111.15      8.54 o 
  -5  -3   6        7.60       13.88      5.42 o 
  -4  -3   6      422.42      583.68     15.97 o 
  -3  -3   6     2165.61     2265.26     71.48 o 
  -2  -3   6      289.94      441.40    148.65 o 
  -1  -3   6      210.10      288.90      8.43 o 
   0  -3   6     2784.86     2562.57     92.21 o 
   1  -3   6       73.80       91.78      4.94 o 
   2  -3   6      185.77      135.64      6.75 o 
   3  -3   6      150.58      203.33      7.38 o 
   4  -3   6     1501.28     1461.51     67.83 o 
   5  -3   6       26.90       18.42      5.44 o 
   6  -3   6      288.67      293.27     11.63 o 
   7  -3   6      256.04      295.27     11.47 o 
   8  -3   6       48.04       44.13      6.80 o 
   9  -3   6      724.89      670.95     21.64 o 
  10  -3   6        0.26       -1.22     11.49 o 
 -10  -2   6      206.45      185.70     15.24 o 
  -9  -2   6      169.04      182.34     14.73 o 
  -8  -2   6       34.09       18.93      5.92 o 
  -7  -2   6      243.96      232.39     10.08 o 
  -6  -2   6     1738.60     1604.21     46.89 o 
  -5  -2   6      301.83      443.52     32.09 o 
  -4  -2   6       41.63       34.33      7.71 o 
  -3  -2   6     4936.88     4520.91     92.64 o 
  -1  -2   6     9063.39     9118.73    130.65 o 
   0  -2   6     6936.88     7291.77    120.31 o 
   1  -2   6     2021.65     2250.46     76.66 o 
   2  -2   6     2589.90     2419.71     71.33 o 
   3  -2   6     1247.59     1225.24     53.81 o 
   4  -2   6     1156.06      994.01     28.37 o 
   5  -2   6       34.79       61.45      6.95 o 
   6  -2   6     1295.68     1297.00     40.46 o 
   7  -2   6      446.06      368.15     69.71 o 
   8  -2   6       82.02       95.60      7.39 o 
   9  -2   6        0.08       23.81     10.54 o 
  10  -2   6      401.37      434.94     45.29 o 
 -10  -1   6      253.74      303.87     34.99 o 
  -9  -1   6      127.44       75.50     11.93 o 
  -8  -1   6       73.63       61.18     15.89 o 
  -7  -1   6     2883.83     2915.75     70.69 o 
  -6  -1   6      148.85      124.12      8.31 o 
  -5  -1   6      148.15      109.94      8.08 o 
  -4  -1   6      218.30      125.12      8.46 o 
  -3  -1   6     3585.22     2948.40     76.12 o 
  -2  -1   6     2308.72     2833.21     74.73 o 
  -1  -1   6     3496.69     3428.10    154.38 o 
   0  -1   6     4782.34     5742.37     97.09 o 
   1  -1   6      493.60      472.60     12.75 o 
   2  -1   6      388.50      503.33     24.66 o 
   3  -1   6       68.70       42.52      4.87 o 
   4  -1   6     4747.25     4164.20    134.71 o 
   5  -1   6      376.91      608.05     17.37 o 
   6  -1   6      462.73      499.23     14.67 o 
   7  -1   6     1533.65     1507.40     84.88 o 
   8  -1   6       27.65       15.54      6.77 o 
   9  -1   6      625.45      602.49     19.19 o 
  10  -1   6      221.61      234.80     15.02 o 
 -10   0   6      191.95      220.17     15.79 o 
  -9   0   6        5.53       -1.12      8.78 o 
  -8   0   6       10.83        6.91     12.69 o 
  -7   0   6       27.73       96.48     16.20 o 
  -6   0   6      870.23      765.62     56.78 o 
  -5   0   6     2255.21     2114.92     65.37 o 
  -4   0   6      579.95      470.08     23.12 o 
  -3   0   6     5925.90     5779.53    166.42 o 
  -1   0   6     3399.62     2886.13     73.81 o 
   0   0   6     3283.07     4192.08     83.58 o 
   1   0   6      703.06      436.64     13.13 o 
   2   0   6      179.02      121.45     22.71 o 
   3   0   6     1510.01     1350.23     34.82 o 
   4   0   6     2555.15     2696.20     73.93 o 
   5   0   6       92.39       93.84      6.99 o 
   6   0   6     3294.50     3385.10    186.85 o 
   7   0   6       42.92       29.23     10.33 o 
   8   0   6        0.14        0.46      6.24 o 
   9   0   6      314.56      295.70     21.59 o 
  10   0   6      324.78      371.25     17.60 o 
  11   0   6       62.87       62.41     12.31 o 
 -10   1   6       60.78       64.31     37.27 o 
  -9   1   6       51.45        4.21     13.55 o 
  -8   1   6        1.18       -5.28      5.28 o 
  -7   1   6      537.33      519.57     14.44 o 
  -6   1   6     1023.00     1014.43    109.26 o 
  -5   1   6      698.64      758.64     22.47 o 
  -4   1   6     3789.35     3973.92    261.81 o 
  -3   1   6     1416.98     1424.60     61.66 o 
  -2   1   6     1677.57     1677.63     90.34 o 
  -1   1   6      984.13      877.29     33.59 o 
   0   1   6     7851.49     8305.22    229.92 o 
   1   1   6    12752.08    13181.02    348.19 o 
   2   1   6      449.36      627.04     18.86 o 
   4   1   6      652.69      501.00    221.46 o 
   5   1   6      158.27      134.62      7.84 o 
   6   1   6      376.97      377.00     25.07 o 
   7   1   6      928.12      738.64     19.01 o 
   8   1   6      153.23      213.20     10.31 o 
   9   1   6      637.32      600.12     44.13 o 
  10   1   6       44.49       58.45     13.69 o 
  11   1   6       35.91       23.03     21.83 o 
  -9   2   6       36.98       23.50     10.37 o 
  -8   2   6      649.04      563.57     20.28 o 
  -7   2   6      233.95      193.24     17.36 o 
  -6   2   6      274.20      213.48     28.07 o 
  -5   2   6      207.93      179.71      8.75 o 
  -4   2   6      944.20     1015.29     26.79 o 
  -3   2   6     1800.26     1568.27     45.67 o 
  -2   2   6     4435.05     4284.56     90.79 o 
  -1   2   6       14.08       44.05      9.51 o 
   0   2   6     3221.92     4090.70    203.49 o 
   1   2   6     1485.15     1630.73     44.74 o 
   2   2   6     2330.15     4615.09     94.34 o 
   3   2   6     7901.03     7924.87    255.97 o 
   4   2   6     1720.04     1709.61    179.96 o 
   5   2   6     2113.86     2293.22     91.60 o 
   6   2   6     1600.67     1433.53     58.52 o 
   7   2   6       47.24      204.22      9.95 o 
   8   2   6        1.88       -3.30      5.88 o 
   9   2   6       74.75       56.57      9.58 o 
  10   2   6      338.10      411.04     19.53 o 
  11   2   6       62.78       78.18     25.95 o 
  -9   3   6        0.22       10.64     14.90 o 
  -8   3   6       42.58       54.78     12.29 o 
  -7   3   6     1205.68     1238.24     28.71 o 
  -6   3   6      217.23      246.75      9.61 o 
  -5   3   6      370.61      377.02     11.51 o 
  -4   3   6      403.54      396.21     18.07 o 
  -3   3   6      130.59       90.38      6.29 o 
  -2   3   6      744.98      696.12     19.39 o 
  -1   3   6        2.61        9.57      3.51 o 
   0   3   6     3104.76     3072.19    114.62 o 
   1   3   6        4.79       16.36      3.66 o 
   2   3   6     6313.26     6565.00    127.51 o 
   3   3   6    12000.91    10580.62    141.73 o 
   4   3   6      167.27      201.98     44.57 o 
   5   3   6     3212.06     3708.70     93.10 o 
   6   3   6       54.03       56.46     16.71 o 
   7   3   6     3199.29     3106.27    126.59 o 
   8   3   6       59.11       54.19      7.80 o 
   9   3   6      597.56      612.05     49.41 o 
  10   3   6       41.07       36.65     12.57 o 
  11   3   6        2.68        3.85     18.48 o 
  -9   4   6       11.61        3.67     13.43 o 
  -8   4   6      724.06      709.52     77.99 o 
  -7   4   6      191.71      203.74     13.09 o 
  -6   4   6      200.24      187.74      8.53 o 
  -5   4   6      399.42      409.63     11.86 o 
  -4   4   6     1349.12     1239.26     40.70 o 
  -3   4   6     4875.77     4504.33     98.97 o 
  -2   4   6     1237.57     1440.61     38.31 o 
  -1   4   6     3417.90     3460.73     78.72 o 
   0   4   6     3873.25     4069.93     87.27 o 
   1   4   6      212.83      289.58      8.66 o 
   2   4   6     5149.78     6557.50    324.25 o 
   3   4   6     9334.79     8688.31    206.66 o 
   4   4   6      463.56      460.54     17.80 o 
   5   4   6      326.89      498.70     30.56 o 
   6   4   6     2449.29     2147.82     69.30 o 
   7   4   6       19.64       25.19      6.56 o 
   8   4   6      113.73       91.84      8.29 o 
   9   4   6        5.19        8.49      6.04 o 
  10   4   6       94.32      116.63     31.24 o 
  11   4   6       20.72       21.85     11.63 o 
  -8   5   6       16.40       62.56     12.64 o 
  -7   5   6     1466.15     1454.73     28.65 o 
  -6   5   6       17.58        9.94      5.95 o 
  -5   5   6        2.79        2.34      5.51 o 
  -4   5   6      988.39      900.91     52.21 o 
  -3   5   6      721.79      747.80     20.29 o 
  -2   5   6        5.10        8.54      3.61 o 
  -1   5   6        5.12        8.61      3.76 o 
   0   5   6     4139.71     3851.02    208.98 o 
   1   5   6      387.35      467.82     11.97 o 
   2   5   6     1835.12     1644.48     55.87 o 
   3   5   6      340.14      370.51     12.27 o 
   4   5   6       93.17      125.98      7.92 o 
   5   5   6       18.10        4.84      6.79 o 
   6   5   6      452.85      424.49     21.83 o 
   7   5   6      338.03      320.69     18.76 o 
   8   5   6      176.51      197.52     14.22 o 
   9   5   6     1191.62     1204.62     54.29 o 
  10   5   6       17.01       63.97     18.82 o 
  11   5   6       24.43       17.61     13.06 o 
  -8   6   6      181.82      194.09     15.76 o 
  -7   6   6      231.92      218.84     16.01 o 
  -6   6   6        0.24        5.24      7.39 o 
  -5   6   6       31.21       15.86      5.52 o 
  -4   6   6      254.23      239.26      9.55 o 
  -3   6   6     1199.20     1111.59     35.11 o 
  -2   6   6      378.72      474.28     14.07 o 
  -1   6   6     4389.22     3986.95    161.99 o 
   0   6   6        0.90        1.71      3.98 o 
   1   6   6      812.49      848.35     24.35 o 
   2   6   6     1278.13     1068.91     29.87 o 
   3   6   6     1413.47     1222.98     32.17 o 
   4   6   6        0.47        1.69     17.15 o 
   5   6   6        3.39       14.03      7.43 o 
   6   6   6      625.81      622.03     17.21 o 
   7   6   6        2.80        7.58      6.47 o 
   8   6   6      111.15       98.95     19.00 o 
   9   6   6        3.44       34.08     11.34 o 
  10   6   6      227.04      235.57     25.34 o 
  11   6   6       34.93       85.83     37.65 o 
  -7   7   6      384.29      396.40     18.52 o 
  -6   7   6       73.68       69.31     10.89 o 
  -5   7   6      298.53      272.42     20.12 o 
  -4   7   6      416.55      470.83     11.91 o 
  -3   7   6       81.23      102.46      7.31 o 
  -2   7   6     2371.56     2431.50     85.67 o 
  -1   7   6       11.97       -5.19      5.19 o 
   0   7   6     3653.47     3640.46    131.09 o 
   1   7   6     3328.74     3093.04     77.38 o 
   2   7   6       75.82      103.09      6.82 o 
   3   7   6      627.73      515.24     19.23 o 
   4   7   6      134.85      181.29      8.54 o 
   5   7   6      226.70      250.16      9.04 o 
   6   7   6      342.99      333.96     21.48 o 
   7   7   6       12.23      227.06     26.77 o 
   8   7   6       17.93       13.84     20.50 o 
   9   7   6      572.41      580.26     34.24 o 
  10   7   6       39.03       58.46     24.01 o 
  11   7   6       25.61       28.64     12.92 o 
  -7   8   6        0.93        6.50     10.26 o 
  -6   8   6       61.19       62.04     11.68 o 
  -5   8   6      421.96      445.71     16.17 o 
  -4   8   6      979.86      927.91     29.81 o 
  -3   8   6      259.80      249.59     10.16 o 
  -2   8   6      154.08      149.23      9.34 o 
  -1   8   6     2346.26     2187.77     49.02 o 
   0   8   6       10.41        9.88      5.16 o 
   1   8   6      338.18      332.19      9.84 o 
   2   8   6      463.12      491.21     13.57 o 
   3   8   6      247.90      216.83      8.51 o 
   4   8   6       70.29       80.79      7.95 o 
   5   8   6      328.45      360.61     12.41 o 
   6   8   6     1964.67     1967.52     43.17 o 
   7   8   6        3.92       41.30     26.46 o 
   8   8   6     1024.16      938.37     33.56 o 
   9   8   6      227.71      245.47     40.51 o 
  10   8   6       43.55       57.09     12.35 o 
  -6   9   6       78.92       68.61     12.63 o 
  -5   9   6      167.77      191.43     13.59 o 
  -4   9   6     1253.65     1264.81     35.77 o 
  -3   9   6       54.65       65.93      6.42 o 
  -2   9   6     1085.12     1096.41     26.19 o 
  -1   9   6      265.39      302.40      9.47 o 
   0   9   6      310.43      328.17      9.52 o 
   1   9   6      164.22      176.44     73.80 o 
   2   9   6      691.56      727.44     18.52 o 
   3   9   6      315.98      373.50     10.33 o 
   4   9   6       29.70       99.15      6.94 o 
   5   9   6      557.10      574.04     21.86 o 
   6   9   6       58.05       61.45      7.80 o 
   7   9   6      706.78      610.60     14.70 o 
   8   9   6      115.73       81.39     23.67 o 
   9   9   6      543.79      686.81     30.97 o 
  10   9   6      167.14      160.33     15.16 o 
  -5  10   6      427.09      503.09     19.02 o 
  -4  10   6       31.11       37.52     10.76 o 
  -3  10   6        0.24        2.20      9.56 o 
  -2  10   6       42.89       30.31      4.93 o 
  -1  10   6      512.97      559.69     16.74 o 
   0  10   6        1.63        1.29      6.79 o 
   1  10   6       14.46       15.21      4.77 o 
   2  10   6     1918.16     1938.58     38.62 o 
   3  10   6      401.49      363.99     13.78 o 
   4  10   6       68.22       65.29     12.52 o 
   5  10   6        5.42        0.92      7.98 o 
   6  10   6      972.35      960.57     40.51 o 
   7  10   6        1.59       -2.74      8.12 o 
   8  10   6      326.10      367.95     91.60 o 
   9  10   6      473.86      485.75     68.00 o 
  10  10   6        3.82        0.92     11.59 o 
  -4  11   6      560.45      544.91     27.93 o 
  -3  11   6       12.84       -9.99      9.99 o 
  -2  11   6      596.01      579.01     17.70 o 
  -1  11   6        3.91       10.66      9.96 o 
   0  11   6       32.07       29.34      6.62 o 
   1  11   6        5.84        1.43      4.60 o 
   2  11   6      519.38      522.89     11.56 o 
   3  11   6      316.45      279.52      9.28 o 
   4  11   6       51.60       51.47      8.93 o 
   5  11   6      982.11      937.48     23.39 o 
   6  11   6        8.19       20.84     14.32 o 
   7  11   6        1.71       11.48     12.69 o 
   8  11   6      128.36      105.80     15.19 o 
   9  11   6      202.95      225.56     16.08 o 
  -3  12   6        2.92       -1.61      8.99 o 
  -2  12   6        2.58        4.22     11.38 o 
  -1  12   6      184.68      209.57     14.73 o 
   0  12   6        2.33       -5.15      8.42 o 
   1  12   6      200.71      179.61     21.62 o 
   2  12   6      176.94      167.04     10.95 o 
   3  12   6      214.03      206.79     40.34 o 
   4  12   6      232.62      266.13     13.82 o 
   5  12   6        0.36       19.90      9.06 o 
   6  12   6      755.58      699.28     20.99 o 
   7  12   6       23.98        6.56     11.80 o 
   8  12   6       90.36       78.67     12.34 o 
  -1  13   6       92.40      115.93     23.22 o 
   0  13   6       49.56       38.35     10.62 o 
   1  13   6      237.61      267.82     15.72 o 
   2  13   6      170.69      238.38     33.28 o 
   3  13   6      153.37      188.14     12.94 o 
   4  13   6        1.68       -9.01      9.01 o 
   5  13   6      701.06      644.16     41.13 o 
   6  13   6       68.43       81.50     12.65 o 
   7  13   6        5.09        4.34     10.71 o 
   1  14   6      284.97      264.37     14.97 o 
   2  14   6      747.31      722.24     21.33 o 
   3  14   6       68.42       28.45     10.58 o 
   4  14   6        9.21       13.79      9.28 o 
   5  14   6       15.24      -10.18     10.18 o 
  -5 -13   7      120.66      129.85     16.20 o 
  -4 -13   7      334.27      314.60     22.81 o 
  -3 -13   7        4.87        6.84      9.46 o 
  -2 -13   7       80.96       94.33     11.11 o 
  -1 -13   7       13.82       25.07     12.61 o 
   0 -13   7      302.20      299.69     23.09 o 
   1 -13   7       12.28        7.42     15.58 o 
  -7 -12   7       37.09       28.12     13.76 o 
  -6 -12   7       15.98       35.22     12.43 o 
  -5 -12   7       65.36       69.24     12.86 o 
  -4 -12   7      143.63      142.42     13.21 o 
  -3 -12   7      182.28      184.26     12.80 o 
  -2 -12   7       99.13      100.54     20.26 o 
  -1 -12   7      549.62      458.13     19.15 o 
   0 -12   7       66.85       61.06     13.85 o 
   1 -12   7        9.75       12.54      9.45 o 
   2 -12   7      120.78      130.13     13.02 o 
   3 -12   7      148.78      178.01     14.14 o 
  -8 -11   7       23.60       13.83      9.77 o 
  -7 -11   7      299.78      297.98     23.77 o 
  -6 -11   7       91.09       87.30     21.35 o 
  -5 -11   7       43.04       33.63     10.22 o 
  -4 -11   7      877.21     1030.37     98.11 o 
  -3 -11   7        0.03       12.13      9.39 o 
  -2 -11   7      440.60      418.06     15.64 o 
  -1 -11   7        2.51       -4.76     10.37 o 
   0 -11   7      225.58      187.05     11.97 o 
   1 -11   7        0.03        1.50      6.80 o 
   2 -11   7      189.40      248.98     20.33 o 
   3 -11   7      409.04      397.86     16.10 o 
   4 -11   7        0.59       -3.99     10.83 o 
  -8 -10   7      430.41      437.57     36.69 o 
  -7 -10   7       17.66       33.80     12.77 o 
  -6 -10   7        2.19       -0.60      9.64 o 
  -5 -10   7      147.01      173.41     13.62 o 
  -4 -10   7      149.04      160.26     12.35 o 
  -3 -10   7      853.14      874.98     22.92 o 
  -2 -10   7       29.87       36.43      5.76 o 
  -1 -10   7      989.71      998.20     48.02 o 
   0 -10   7       17.47        4.55      4.59 o 
   1 -10   7       32.51       62.47      6.99 o 
   2 -10   7      314.58      314.05     19.61 o 
   3 -10   7      147.59      168.77     12.72 o 
   4 -10   7        0.51       15.80     12.89 o 
   5 -10   7       89.15      114.69     12.35 o 
  -9  -9   7        0.53        7.39     11.09 o 
  -8  -9   7      220.91      200.47     34.24 o 
  -7  -9   7      305.02      323.41     24.42 o 
  -6  -9   7       17.20        9.07      9.17 o 
  -5  -9   7      472.15      462.77     11.60 o 
  -4  -9   7     1440.70     1674.52     34.71 o 
  -3  -9   7       49.49       52.45      6.89 o 
  -2  -9   7      508.68      536.90     14.41 o 
  -1  -9   7      146.09      158.43     16.44 o 
   0  -9   7      172.01      175.08     12.38 o 
   1  -9   7        7.89       32.33     16.61 o 
   2  -9   7      565.61      640.86     20.83 o 
   3  -9   7      199.70      214.61      8.13 o 
   4  -9   7       85.16       90.46     11.21 o 
   5  -9   7      685.28      684.82     20.76 o 
   6  -9   7        0.30       -8.85     12.62 o 
  -9  -8   7       34.29       26.42     12.63 o 
  -8  -8   7      335.20      364.74     17.29 o 
  -7  -8   7      462.20      401.80     47.98 o 
  -6  -8   7       80.74       80.77      7.40 o 
  -5  -8   7      880.87      894.02     28.68 o 
  -4  -8   7      248.72      271.36     10.25 o 
  -3  -8   7      191.13      173.63      8.96 o 
  -2  -8   7      168.86      157.49     27.66 o 
  -1  -8   7     1520.13     1623.54     41.72 o 
   0  -8   7      317.81      266.01     18.82 o 
   1  -8   7      375.54      378.05     26.12 o 
   2  -8   7     1763.58     1725.37     38.50 o 
   3  -8   7       78.00       44.55      7.08 o 
   4  -8   7        3.27        8.83      5.21 o 
   5  -8   7      100.28       98.36     10.25 o 
   6  -8   7      192.52      183.42     18.14 o 
   7  -8   7        5.28       17.58     15.35 o 
 -10  -7   7        1.03        3.85     13.28 o 
  -9  -7   7      148.06      164.01     22.58 o 
  -8  -7   7      245.11      200.70     34.27 o 
  -7  -7   7      566.40      509.97     12.02 o 
  -6  -7   7      259.47      264.41      9.82 o 
  -5  -7   7       37.67       45.91      6.06 o 
  -4  -7   7     1153.98     1325.36     42.62 o 
  -3  -7   7        0.95        7.55      8.22 o 
  -2  -7   7      329.98      357.91     15.99 o 
  -1  -7   7       34.44       60.22      6.49 o 
   0  -7   7      361.20      310.17     10.18 o 
   1  -7   7      148.40      121.56      6.96 o 
   2  -7   7     1881.68     1774.81     43.98 o 
   3  -7   7      353.59      389.83     10.84 o 
   4  -7   7      319.28      328.40      9.96 o 
   5  -7   7      295.93      343.15     10.88 o 
   6  -7   7        0.56       -2.30      8.27 o 
   7  -7   7        2.73       11.19      9.80 o 
   8  -7   7       12.71       38.73     10.81 o 
 -10  -6   7       59.59       44.93     12.89 o 
  -9  -6   7       37.65       47.96     12.14 o 
  -8  -6   7      404.40      408.51     16.55 o 
  -7  -6   7       98.73      115.76      8.96 o 
  -6  -6   7       33.61       12.55      8.52 o 
  -5  -6   7     1755.13     1868.89     48.26 o 
  -4  -6   7      663.36      652.73     22.27 o 
  -3  -6   7       59.10      106.57     13.47 o 
  -2  -6   7      185.63      234.71     28.00 o 
  -1  -6   7     4997.68     4467.17     78.23 o 
   0  -6   7      147.20      128.01      7.26 o 
   1  -6   7     1045.82     1053.84     26.47 o 
   2  -6   7     3948.02     3749.80     69.07 o 
   3  -6   7       23.20      171.62      9.00 o 
   4  -6   7       65.53       99.61      7.15 o 
   5  -6   7       55.65       69.19     13.30 o 
   6  -6   7      384.31      439.84     14.02 o 
   7  -6   7        4.93        5.71     11.24 o 
   8  -6   7      202.71      217.16     14.50 o 
 -10  -5   7      103.43      109.16     15.84 o 
  -9  -5   7      228.35      239.26     15.59 o 
  -8  -5   7      107.00       93.75     10.64 o 
  -7  -5   7       95.72      139.43      8.00 o 
  -6  -5   7      186.31      208.14      9.21 o 
  -5  -5   7     1318.13     1489.60     41.62 o 
  -3  -5   7        0.15        4.53      6.92 o 
  -2  -5   7     5304.90     5001.30     87.61 o 
  -1  -5   7     1984.71     1927.70     99.31 o 
   0  -5   7       41.17       82.03      5.58 o 
   1  -5   7     1157.24     1083.53     57.29 o 
   2  -5   7       78.52       76.75     11.05 o 
   3  -5   7       96.67      216.61     15.99 o 
   4  -5   7       84.15      101.29      6.99 o 
   5  -5   7      288.40      291.23      9.66 o 
   6  -5   7      658.14      636.83     19.40 o 
   7  -5   7       56.73       69.07     19.88 o 
   8  -5   7      170.89      181.38     14.39 o 
   9  -5   7      128.03      137.38     14.20 o 
 -10  -4   7        0.28        5.35     17.49 o 
  -9  -4   7       36.65       52.92     10.33 o 
  -8  -4   7      423.68      439.81     11.29 o 
  -7  -4   7       23.95       33.92      6.95 o 
  -6  -4   7        9.80       25.76      9.65 o 
  -5  -4   7     1480.93     1286.16     83.82 o 
  -4  -4   7      234.85      185.55      8.37 o 
  -3  -4   7      102.64      150.45      6.80 o 
  -1  -4   7      555.31      534.56     20.97 o 
   0  -4   7      800.60      765.86     29.94 o 
   1  -4   7        6.32        8.43      3.85 o 
   2  -4   7     3348.34     3070.75     73.14 o 
   4  -4   7      316.31      244.34      8.64 o 
   5  -4   7       87.04      101.69     18.04 o 
   6  -4   7       70.52       43.09      6.17 o 
   7  -4   7       91.43       63.96     38.57 o 
   8  -4   7     1070.74     1146.94     25.10 o 
   9  -4   7       50.98       60.58     11.81 o 
 -10  -3   7        0.48       14.81     12.15 o 
  -9  -3   7      458.64      481.62     18.91 o 
  -8  -3   7      278.76      232.65      9.43 o 
  -7  -3   7       17.54       84.28      7.81 o 
  -6  -3   7      140.57       96.95      9.17 o 
  -5  -3   7      700.95      766.02     20.62 o 
  -4  -3   7      575.98      370.15     21.14 o 
  -3  -3   7      789.34      735.84     38.09 o 
  -2  -3   7    16762.16    16215.25    169.52 o 
  -1  -3   7        3.15        8.99      3.54 o 
   0  -3   7      942.05      948.57     26.04 o 
   1  -3   7     2370.80     1948.65     62.39 o 
   2  -3   7     4738.50     4505.62     92.11 o 
   3  -3   7      181.83      151.09      7.26 o 
   4  -3   7        0.52        1.70      6.82 o 
   5  -3   7     2124.99     2200.98     54.29 o 
   6  -3   7       60.87       55.63      7.03 o 
   7  -3   7       88.62       80.16      7.86 o 
   8  -3   7      114.08      119.94     17.09 o 
   9  -3   7      413.74      408.19     19.42 o 
  10  -3   7        2.32       12.22     27.35 o 
 -10  -2   7       48.17       46.02     11.89 o 
  -9  -2   7      168.30      162.23     15.63 o 
  -8  -2   7     1145.88     1112.37     25.82 o 
  -7  -2   7        8.00       73.11     16.27 o 
  -6  -2   7     1277.76     1361.37     42.07 o 
  -5  -2   7     2699.78     3123.13     67.76 o 
  -4  -2   7      607.17      589.93     18.22 o 
  -3  -2   7     2569.92     2449.56    146.16 o 
  -1  -2   7     6886.54     7298.38    205.88 o 
   0  -2   7       85.32       95.94     10.84 o 
   1  -2   7      723.46      618.92     19.77 o 
   2  -2   7     1921.17     1743.70     60.91 o 
   3  -2   7      155.59       93.14     16.61 o 
   4  -2   7      634.50      712.41     38.30 o 
   5  -2   7       18.57       64.20      8.05 o 
   6  -2   7      208.99      263.13     10.31 o 
   7  -2   7      636.55      505.37    158.99 o 
   8  -2   7      670.10      661.50     26.29 o 
   9  -2   7      514.98      524.06     20.45 o 
  10  -2   7        0.05       12.05     13.37 o 
 -10  -1   7        0.01        9.43     11.99 o 
  -9  -1   7      165.53      167.50     15.31 o 
  -8  -1   7       20.42        9.05      5.52 o 
  -7  -1   7        0.62      182.58     39.46 o 
  -6  -1   7     2640.11     2584.35     53.23 o 
  -5  -1   7      348.84      397.91     27.28 o 
  -4  -1   7     3524.27     3944.12    198.85 o 
  -3  -1   7       86.93      496.68    108.55 o 
  -2  -1   7     3663.36     3714.02    180.74 o 
  -1  -1   7     2683.92     2636.06     75.78 o 
   0  -1   7      163.52      162.42      5.64 o 
   1  -1   7      623.29      566.93     23.91 o 
   2  -1   7     2565.23     2521.68     97.57 o 
   3  -1   7      382.03      408.89     15.79 o 
   4  -1   7       61.34       54.15      5.72 o 
   5  -1   7    11762.64    12254.78    132.27 o 
   6  -1   7      201.46      233.80      9.76 o 
   7  -1   7       40.59       -6.79     12.04 o 
   8  -1   7      707.92      619.09     29.16 o 
   9  -1   7      339.64      345.18     38.16 o 
  10  -1   7       39.10       15.42     13.16 o 
 -10   0   7       21.34       29.34     11.91 o 
  -9   0   7      132.25      118.30     13.14 o 
  -8   0   7       60.94       72.50     11.52 o 
  -7   0   7      117.53      123.79      8.31 o 
  -6   0   7      875.92      986.52     33.59 o 
  -5   0   7     4514.86     5527.86    106.43 o 
  -4   0   7       43.82       11.64     10.30 o 
  -3   0   7      285.29      773.93     31.31 o 
  -2   0   7      138.14      387.62     38.40 o 
  -1   0   7     2709.80     2538.87     74.72 o 
   0   0   7      258.84      221.91      6.25 o 
   1   0   7     5404.86     4824.96     98.36 o 
   2   0   7     6244.85     5977.19    108.95 o 
   3   0   7       13.68        9.60      7.86 o 
   4   0   7     2364.69     2209.15     65.65 o 
   6   0   7     2986.33     3076.81     71.89 o 
   7   0   7      216.50      282.47     47.40 o 
   8   0   7      228.11      235.36      9.65 o 
   9   0   7       25.04       61.30     11.57 o 
  10   0   7       15.47       20.25     12.57 o 
  11   0   7       94.97       69.43     13.38 o 
  -9   1   7      793.39      698.80     24.92 o 
  -8   1   7      108.23      117.92     12.20 o 
  -7   1   7        0.17        3.71      6.61 o 
  -6   1   7     1275.17     1188.97     43.38 o 
  -5   1   7        3.87       53.99      8.32 o 
  -4   1   7       82.14       89.78      6.68 o 
  -2   1   7     5311.93     4415.18    107.29 o 
  -1   1   7      127.49      139.96      9.86 o 
   0   1   7      212.76      271.42      9.17 o 
   1   1   7    17319.22    16597.81    520.44 o 
   2   1   7      425.93      809.86     54.46 o 
   4   1   7        4.54        5.53      5.97 o 
   5   1   7     4178.77     4162.82    188.38 o 
   6   1   7      113.85      100.89      7.76 o 
   7   1   7       97.39      122.61      9.52 o 
   8   1   7       12.87       17.39      5.85 o 
   9   1   7       18.50        2.42      7.43 o 
  10   1   7      161.42      165.32     25.47 o 
  11   1   7       10.00        3.75     10.24 o 
  -9   2   7      118.50      134.03     16.51 o 
  -8   2   7      155.60      130.76     13.03 o 
  -7   2   7      110.10      101.59      7.52 o 
  -6   2   7      223.83      209.56      9.21 o 
  -5   2   7     1441.34     1712.49     50.20 o 
  -4   2   7      257.27      229.72      9.04 o 
  -3   2   7     1082.31     1007.20     30.21 o 
  -2   2   7      573.26      689.51     53.78 o 
  -1   2   7      203.27      183.69      7.09 o 
   0   2   7       92.14      108.44      6.62 o 
   1   2   7     5117.08     5816.53    105.96 o 
   2   2   7    11301.18    11924.38    150.78 o 
   3   2   7      168.15      289.02    176.21 o 
   4   2   7     1216.44     1034.20     28.85 o 
   5   2   7      125.04      342.38     37.07 o 
   6   2   7       71.31       79.27     16.40 o 
   7   2   7     2820.18     2826.80     55.04 o 
   8   2   7      642.81      616.71     31.27 o 
   9   2   7        3.46       -0.01      5.21 o 
  10   2   7       10.44       15.99     16.81 o 
  11   2   7      512.50      442.03     20.68 o 
  -9   3   7      141.63      138.04     15.87 o 
  -8   3   7      157.37       89.42     20.19 o 
  -7   3   7      135.98       93.98      8.32 o 
  -6   3   7      209.98      157.79      8.46 o 
  -5   3   7       56.25       53.80      7.29 o 
  -4   3   7       73.87       60.47      9.31 o 
  -3   3   7       11.00      150.66     27.04 o 
  -2   3   7     8125.84     7853.80    112.75 o 
  -1   3   7      209.78      163.25      9.62 o 
   0   3   7      733.34      795.52     24.54 o 
   1   3   7     4488.28     4111.89    105.27 o 
   2   3   7     2698.24     3302.73     81.57 o 
   3   3   7     1931.97     2123.14     99.27 o 
   4   3   7      220.64      275.06     21.96 o 
   5   3   7      964.70     1167.37     30.43 o 
   6   3   7      939.86      979.04     70.29 o 
   7   3   7       35.05       76.37     16.16 o 
   8   3   7      519.07      435.72     30.39 o 
   9   3   7        3.68        6.67      5.52 o 
  10   3   7       36.67       27.07      9.41 o 
  11   3   7       32.80       14.01     22.00 o 
  -9   4   7      120.03       94.12     13.56 o 
  -8   4   7        1.59       42.12     13.16 o 
  -7   4   7      139.32      124.80     12.93 o 
  -6   4   7       55.78       62.75     14.02 o 
  -5   4   7      651.21      860.83     69.30 o 
  -4   4   7      407.76      396.44     13.27 o 
  -3   4   7     1427.87     1701.96     47.67 o 
  -2   4   7     1520.07     1527.65     49.77 o 
  -1   4   7       60.37       58.09     12.11 o 
   0   4   7     2250.32     2090.18     64.72 o 
   1   4   7      851.22      807.81     22.69 o 
   2   4   7     6555.47     6282.33    108.17 o 
   3   4   7     1718.22     1779.42     41.70 o 
   4   4   7      847.40      923.77     26.49 o 
   5   4   7     2377.41     2213.68     64.18 o 
   6   4   7      406.51      387.61     22.81 o 
   7   4   7      260.50      276.79     10.29 o 
   8   4   7      713.59      672.98     32.23 o 
   9   4   7      188.09      195.73      9.11 o 
  10   4   7       21.46       -1.51     10.24 o 
  11   4   7      337.07      357.19     23.19 o 
  -8   5   7      202.44      199.26     15.66 o 
  -7   5   7       11.69      -13.25     13.25 o 
  -6   5   7      384.85      389.66     10.51 o 
  -5   5   7      664.85      686.40     17.17 o 
  -4   5   7       26.33       19.03     12.28 o 
  -3   5   7       23.06      337.23     35.26 o 
  -2   5   7     1631.51     1510.00     45.81 o 
  -1   5   7     1666.64     1759.95     47.33 o 
   0   5   7      752.89      780.13     21.73 o 
   1   5   7     6286.41     5954.23    171.74 o 
   2   5   7       75.91      257.24      7.84 o 
   3   5   7     2980.24     3093.55     73.22 o 
   4   5   7       35.96       33.90      5.84 o 
   5   5   7      415.21      383.75     28.07 o 
   6   5   7        4.42       42.41     35.53 o 
   7   5   7      181.22      182.51      9.57 o 
   8   5   7       92.79      120.66     11.19 o 
   9   5   7       27.42       80.86     20.15 o 
  10   5   7      458.01      469.13     75.20 o 
  11   5   7        5.35       15.75     11.07 o 
  -8   6   7        0.21        9.86     10.31 o 
  -7   6   7        7.21       13.13     17.84 o 
  -6   6   7       51.30       49.27     21.72 o 
  -5   6   7       48.04       63.70      7.76 o 
  -4   6   7       89.48       83.48     13.44 o 
  -3   6   7     1776.09     1772.31     42.89 o 
  -2   6   7     1366.60     1255.21     39.15 o 
  -1   6   7       26.24       31.62     12.79 o 
   0   6   7     2007.17     2278.86     57.39 o 
   1   6   7     1874.17     1847.07     53.68 o 
   2   6   7        9.34       39.73     14.22 o 
   3   6   7       65.98      162.61      7.14 o 
   4   6   7     2096.10     2053.94     90.54 o 
   5   6   7       67.12       63.97      7.05 o 
   6   6   7      176.95      207.85     10.11 o 
   7   6   7      197.97      195.47     21.93 o 
   8   6   7      799.75      815.66     29.84 o 
   9   6   7      236.35      240.95     22.44 o 
  10   6   7        1.83        7.27     11.18 o 
  11   6   7      315.98      319.14     19.65 o 
  -7   7   7       52.12       55.48     18.04 o 
  -6   7   7      807.62      769.26     25.03 o 
  -5   7   7       11.99        6.95      9.23 o 
  -4   7   7      574.25      555.58     13.30 o 
  -3   7   7       62.77      279.53     28.07 o 
  -2   7   7     1949.78     1862.73     52.48 o 
  -1   7   7        0.02        2.37      5.63 o 
   0   7   7     1212.09     1301.24     41.06 o 
   1   7   7      588.00      444.75     12.73 o 
   2   7   7      156.15      195.35      7.96 o 
   3   7   7     3039.82     2845.36     60.10 o 
   4   7   7      182.24      320.71     15.18 o 
   5   7   7     1190.92     1079.52     57.46 o 
   6   7   7      587.74      553.33     41.33 o 
   7   7   7     1657.38     1586.40     47.74 o 
   8   7   7      581.68      596.56     68.75 o 
   9   7   7       67.34      113.15     11.75 o 
  10   7   7      135.62      176.05     14.37 o 
  11   7   7       18.22       19.34     15.35 o 
  -6   8   7      102.67      113.37     11.93 o 
  -5   8   7      455.96      452.33     44.78 o 
  -4   8   7       71.36       62.53     10.26 o 
  -3   8   7      885.66      870.46     32.70 o 
  -2   8   7     1032.22     1068.70     28.31 o 
  -1   8   7        0.82       26.35     17.22 o 
   0   8   7     1686.34     1728.56     41.28 o 
   1   8   7       17.28        2.53      4.13 o 
   2   8   7      407.67      451.50     13.16 o 
   3   8   7        8.31       17.24      5.20 o 
   4   8   7     1731.96     1870.64     44.61 o 
   5   8   7     1094.17      989.53     37.75 o 
   6   8   7       14.12       -5.79      5.79 o 
   7   8   7     1048.89     1129.75    114.07 o 
   8   8   7      290.30      270.00     49.96 o 
   9   8   7        9.07       24.52     20.84 o 
  10   8   7       38.64       17.52     14.66 o 
  -6   9   7      368.65      382.96     18.54 o 
  -5   9   7        5.32      -11.19     11.34 o 
  -4   9   7       33.77       26.20      9.04 o 
  -3   9   7       73.19      131.64     30.04 o 
  -2   9   7       88.68      103.48      9.89 o 
  -1   9   7      293.15      278.41     23.22 o 
   0   9   7      102.54      127.35      7.06 o 
   1   9   7     2442.29     2247.38     43.17 o 
   2   9   7       15.05        0.50      5.75 o 
   3   9   7     1195.06     1265.31     35.05 o 
   4   9   7      127.34      164.25      8.97 o 
   5   9   7     1043.93     1084.47     35.88 o 
   6   9   7       41.23      -20.26     20.26 o 
   7   9   7      489.39      488.00     12.00 o 
   8   9   7      249.55      276.38     20.36 o 
   9   9   7        4.36        6.47     10.42 o 
  10   9   7      195.65      160.26     15.17 o 
  -5  10   7      187.46      175.39     14.24 o 
  -4  10   7       92.04       37.41     12.08 o 
  -3  10   7      419.98      457.17     16.85 o 
  -2  10   7       28.92       50.70      8.90 o 
  -1  10   7      265.80      272.43      8.81 o 
   0  10   7      675.55      677.29     26.74 o 
   1  10   7       31.93       33.23     14.43 o 
   2  10   7      543.47      596.23     13.08 o 
   3  10   7      174.90      166.33      8.02 o 
   4  10   7      643.73      709.60     43.55 o 
   5  10   7      183.27      212.48      8.73 o 
   6  10   7        4.97        5.38      5.35 o 
   7  10   7       33.13       51.98     19.30 o 
   8  10   7        4.07      -12.66     20.53 o 
   9  10   7       83.46       75.33     15.04 o 
  10  10   7        0.24       -8.56     11.09 o 
  -4  11   7       74.06       86.16     19.61 o 
  -3  11   7      412.46      450.84     18.33 o 
  -2  11   7       13.73        9.84      9.50 o 
  -1  11   7       44.57       40.16      9.66 o 
   0  11   7      170.04      192.15     11.49 o 
   1  11   7      494.62      503.47     20.29 o 
   2  11   7        0.05        4.39      5.47 o 
   3  11   7      566.60      532.88     11.52 o 
   4  11   7      315.38      319.23     11.90 o 
   5  11   7      136.52      148.89     11.56 o 
   6  11   7      644.73      644.64     42.39 o 
   7  11   7       42.50       59.76     16.10 o 
   8  11   7       81.75       67.36     15.41 o 
   9  11   7        0.73       16.04     15.86 o 
  -3  12   7      279.87      292.35     16.65 o 
  -2  12   7      125.88      124.44     28.31 o 
  -1  12   7        2.02       14.56      9.58 o 
   0  12   7      481.70      510.03     50.54 o 
   1  12   7       69.66       50.81     16.27 o 
   2  12   7       38.55       36.01      9.40 o 
   3  12   7       22.63       16.28      9.75 o 
   4  12   7      633.67      664.35     19.67 o 
   5  12   7       12.73        3.23      8.73 o 
   6  12   7      181.36      209.52     29.36 o 
   7  12   7      548.40      528.44     29.67 o 
   8  12   7       16.58       21.47     15.48 o 
  -1  13   7       55.20       63.29     11.98 o 
   0  13   7        3.80        7.30      8.13 o 
   1  13   7      394.86      358.72     15.88 o 
   2  13   7       65.02       33.24     21.59 o 
   3  13   7      320.45      351.16     15.62 o 
   4  13   7      389.76      382.39     18.04 o 
   5  13   7        1.07       -9.44      9.44 o 
   6  13   7      123.36      169.05     14.43 o 
   7  13   7       56.70       44.28     13.58 o 
   1  14   7       68.24       59.21     10.52 o 
   2  14   7       23.09       25.85     11.33 o 
   3  14   7      154.50      187.11     20.70 o 
   4  14   7      103.16       82.44     13.29 o 
   5  14   7        0.01       13.85     11.24 o 
  -4 -13   8        7.81        6.50     16.54 o 
  -3 -13   8        3.36       12.01     11.36 o 
  -2 -13   8      174.49      181.83     14.88 o 
  -1 -13   8       99.24      118.37     21.72 o 
   0 -13   8       35.11       36.29     10.42 o 
  -6 -12   8        0.26        9.19     16.23 o 
  -5 -12   8      226.31      195.37     24.93 o 
  -4 -12   8        5.23       -0.49     10.26 o 
  -3 -12   8      449.88      500.62     18.46 o 
  -2 -12   8      121.43      118.96     11.84 o 
  -1 -12   8       11.74       11.52      9.51 o 
   0 -12   8       54.40       48.11     17.02 o 
   1 -12   8       18.23       30.23      9.84 o 
   2 -12   8      211.20      209.81     14.79 o 
  -7 -11   8      180.30      173.95     14.70 o 
  -6 -11   8      343.93      377.80     18.58 o 
  -5 -11   8        0.43       -3.30      9.17 o 
  -4 -11   8        6.57       -0.84      9.93 o 
  -3 -11   8      288.75      247.48     15.31 o 
  -2 -11   8      643.55      559.39     17.40 o 
  -1 -11   8       78.16       68.86     12.24 o 
   0 -11   8       54.00       63.67     10.13 o 
   1 -11   8      328.24      403.45     40.79 o 
   2 -11   8       14.52       19.41      9.65 o 
   3 -11   8      138.10      153.26     12.66 o 
   4 -11   8       33.89       31.50     12.98 o 
  -8 -10   8       40.51       24.94     16.91 o 
  -7 -10   8      199.82      200.94     14.56 o 
  -6 -10   8        2.60       -0.07      9.93 o 
  -5 -10   8      211.19      180.57     27.90 o 
  -4 -10   8       27.25       36.18     10.59 o 
  -3 -10   8      387.70      410.37     10.56 o 
  -2 -10   8      639.11      637.74     19.34 o 
  -1 -10   8      122.98       88.00      7.25 o 
   0 -10   8      127.59      117.62      9.24 o 
   1 -10   8       48.36       61.64     13.20 o 
   2 -10   8       21.80        9.88      7.75 o 
   3 -10   8       74.17       57.79     12.24 o 
   4 -10   8      774.81      843.27     22.58 o 
   5 -10   8       49.66       64.23     13.54 o 
  -8  -9   8       22.12       -0.36     10.77 o 
  -7  -9   8        0.74       -8.68      8.68 o 
  -6  -9   8      451.47      488.03     16.67 o 
  -5  -9   8        0.60       -6.32      6.32 o 
  -4  -9   8       89.89       81.87     12.62 o 
  -3  -9   8      151.43      188.79     16.06 o 
  -2  -9   8      268.97      249.53      9.82 o 
  -1  -9   8      208.46      179.29     14.22 o 
   0  -9   8      148.70      131.06      7.28 o 
   1  -9   8      846.92      930.80     26.33 o 
   2  -9   8       32.99       32.07      7.78 o 
   3  -9   8      797.79      847.85     24.28 o 
   4  -9   8      266.57      291.30     13.81 o 
   5  -9   8      190.06      197.62     16.17 o 
   6  -9   8       13.56       10.67     10.71 o 
  -9  -8   8       61.16       86.78     12.09 o 
  -8  -8   8        4.52        0.96     11.32 o 
  -7  -8   8      270.70      240.42     16.11 o 
  -6  -8   8      349.18      351.79     13.78 o 
  -5  -8   8      215.35      223.44      8.90 o 
  -4  -8   8        2.85       18.17      7.84 o 
  -3  -8   8      805.27      873.98     36.01 o 
  -2  -8   8        4.79       15.47      6.62 o 
  -1  -8   8     1419.46     1302.65     42.90 o 
   0  -8   8     3625.49     3502.30     74.24 o 
   1  -8   8      270.31      249.15      9.11 o 
   2  -8   8       14.38       10.33      5.25 o 
   3  -8   8       10.13       25.30     29.64 o 
   4  -8   8     1302.80     1320.31     26.80 o 
   5  -8   8       61.94       66.63     10.95 o 
   6  -8   8      300.77      328.22     18.52 o 
   7  -8   8       28.89       20.94     22.95 o 
  -9  -7   8       54.99       84.16     14.20 o 
  -8  -7   8      129.59      139.99     13.91 o 
  -7  -7   8       29.32       25.48     16.06 o 
  -6  -7   8      797.00      924.38     43.04 o 
  -5  -7   8       87.06      103.03      7.56 o 
  -4  -7   8     1114.97     1061.60     32.36 o 
  -3  -7   8      389.65      402.43     10.51 o 
  -2  -7   8      113.02      127.54      7.13 o 
  -1  -7   8       79.10      119.84     12.31 o 
   0  -7   8      808.08      923.38     55.04 o 
   1  -7   8     1709.17     1303.88     65.68 o 
   2  -7   8      856.22      980.56     24.72 o 
   3  -7   8     2119.71     1929.01     59.34 o 
   4  -7   8        4.21       -0.04     10.23 o 
   5  -7   8       32.76       17.78      5.69 o 
   6  -7   8      215.60      232.05     36.18 o 
   7  -7   8      313.64      325.48     16.47 o 
   8  -7   8       28.61       31.30     10.17 o 
  -9  -6   8      240.12      251.07     16.43 o 
  -8  -6   8      133.91      126.92     12.12 o 
  -7  -6   8       47.07       94.18      7.87 o 
  -6  -6   8       28.39       34.65      7.96 o 
  -5  -6   8       95.72       69.26      6.53 o 
  -4  -6   8       56.67       51.53      6.43 o 
  -3  -6   8     2064.51     2129.93     53.61 o 
  -2  -6   8       22.78       46.38      5.81 o 
  -1  -6   8       92.18       70.27      6.35 o 
   0  -6   8     3010.06     2919.93     62.47 o 
   1  -6   8      845.39      785.55     30.45 o 
   2  -6   8      145.91      113.45      7.13 o 
   3  -6   8        8.89      237.35      9.28 o 
   4  -6   8      337.06      316.99     10.25 o 
   5  -6   8       50.93       54.86      6.44 o 
   6  -6   8       67.09       63.20     11.83 o 
   7  -6   8     1065.03     1119.75     46.28 o 
   8  -6   8       15.64       38.74     13.71 o 
 -10  -5   8      125.80      151.33     15.92 o 
  -9  -5   8        2.94       14.48     11.67 o 
  -8  -5   8        1.91        3.60     10.95 o 
  -7  -5   8        0.21       20.83      6.18 o 
  -6  -5   8     1265.15     1400.84     33.90 o 
  -5  -5   8       20.79        6.89     18.31 o 
  -4  -5   8     1507.62     1385.89     44.37 o 
  -3  -5   8     1004.91     1137.93     31.76 o 
  -2  -5   8      619.85      702.35     20.79 o 
  -1  -5   8       29.74       43.54      8.39 o 
   0  -5   8       48.98       58.05      5.35 o 
   1  -5   8     4075.86     3981.69     76.85 o 
   2  -5   8       44.41       32.75      5.18 o 
   3  -5   8     2636.17     2712.37     58.20 o 
   4  -5   8      267.88      280.54      9.86 o 
   5  -5   8       11.03       19.11     11.73 o 
   6  -5   8       53.31       98.47      6.84 o 
   7  -5   8      357.43      381.86     16.13 o 
   8  -5   8       31.33       25.90     10.82 o 
   9  -5   8       53.87       40.94     17.80 o 
 -10  -4   8      110.86      122.85     15.02 o 
  -9  -4   8      456.95      528.22     31.68 o 
  -8  -4   8      124.38      112.31     15.38 o 
  -7  -4   8      948.91      898.34     24.85 o 
  -6  -4   8       32.74       29.33      6.17 o 
  -5  -4   8      103.33      153.18      9.04 o 
  -4  -4   8      846.04      830.45     22.63 o 
  -3  -4   8     3529.99     3843.68     75.71 o 
  -2  -4   8      377.69      367.91     11.39 o 
  -1  -4   8     3041.42     3065.28     71.63 o 
   0  -4   8     3312.04     2988.93    141.08 o 
   1  -4   8     1349.06     1409.86     70.49 o 
   2  -4   8     1152.98     1174.53     30.00 o 
   3  -4   8      647.68      765.22     67.22 o 
   4  -4   8     1069.78     1126.40     61.76 o 
   5  -4   8      105.53       69.05      7.74 o 
   6  -4   8      173.41      197.58      9.15 o 
   7  -4   8     1125.19     1058.75     24.36 o 
   8  -4   8        1.99       12.59     18.65 o 
   9  -4   8      106.92       96.93     18.65 o 
 -10  -3   8       97.02       99.13     15.70 o 
  -9  -3   8       19.60       35.69     26.05 o 
  -8  -3   8      323.59      328.68     22.61 o 
  -7  -3   8        0.40       20.23     15.41 o 
  -6  -3   8      527.56      584.17     14.88 o 
  -5  -3   8       14.82       68.04     13.33 o 
  -4  -3   8      728.73      816.97     20.49 o 
  -3  -3   8      287.15      224.11      7.82 o 
  -2  -3   8     1033.95     1504.65     38.80 o 
  -1  -3   8      824.42      797.85     36.90 o 
   0  -3   8      521.48      583.63     15.00 o 
   1  -3   8     2175.03     2024.47     61.83 o 
   2  -3   8     1748.36     1804.97     55.55 o 
   3  -3   8     1641.97     1625.53     52.52 o 
   4  -3   8      124.32      139.21      7.55 o 
   5  -3   8       16.18       21.09     13.20 o 
   6  -3   8      884.90      784.13     19.58 o 
   7  -3   8      618.34      614.12     14.22 o 
   8  -3   8      133.97      110.73     13.02 o 
   9  -3   8      110.32      124.37     16.47 o 
  10  -3   8      337.25      437.40     20.33 o 
 -10  -2   8       80.62       92.62     13.83 o 
  -9  -2   8      263.72      261.41     20.73 o 
  -8  -2   8       54.23       75.64     13.38 o 
  -7  -2   8     1466.62     1474.62     89.79 o 
  -6  -2   8      292.75      297.76     10.90 o 
  -5  -2   8       53.65      190.71     22.13 o 
  -4  -2   8     2058.04     1943.89     53.58 o 
  -3  -2   8     1370.68     1315.79     34.25 o 
  -2  -2   8     2540.04     2869.96     91.97 o 
  -1  -2   8      246.05      352.89     10.62 o 
   0  -2   8     4588.55     4639.46     94.20 o 
   1  -2   8      137.54      169.19      6.73 o 
   2  -2   8       87.61       61.91      5.33 o 
   3  -2   8     1870.85     1588.27     54.53 o 
   4  -2   8     1523.28     1293.61     43.75 o 
   5  -2   8        5.78       28.27      9.58 o 
   6  -2   8      482.78      533.11     13.36 o 
   7  -2   8      916.91      808.26     23.33 o 
   8  -2   8       89.91       50.04      9.34 o 
   9  -2   8       79.88       87.06     22.92 o 
  10  -2   8       35.00       26.44     12.98 o 
 -10  -1   8      240.88      220.21     20.94 o 
  -9  -1   8       10.26       -0.31     27.25 o 
  -8  -1   8        5.43       13.38      8.81 o 
  -7  -1   8       37.03      107.15      7.95 o 
  -6  -1   8      592.62      559.61     14.97 o 
  -5  -1   8       46.93      140.03      8.71 o 
  -4  -1   8      735.24      917.93     25.79 o 
  -3  -1   8      583.39      839.04     23.01 o 
  -2  -1   8       30.20       91.14     17.84 o 
  -1  -1   8     2152.92     1945.40    115.20 o 
   0  -1   8      856.44      913.30     43.21 o 
   1  -1   8        6.99        9.08      4.11 o 
   2  -1   8      396.41      378.24     38.88 o 
   3  -1   8     3242.34     2877.33    136.82 o 
   4  -1   8     1692.14     1643.31     67.42 o 
   5  -1   8      299.70      444.38     13.20 o 
   6  -1   8     3297.98     3220.73     61.42 o 
   7  -1   8        1.40        0.63      7.10 o 
   8  -1   8      133.10      118.98     10.26 o 
   9  -1   8        0.03       -9.10     11.73 o 
  10  -1   8      359.65      394.77     19.47 o 
  -9   0   8       28.31       25.26     10.83 o 
  -8   0   8       96.93       65.70     11.12 o 
  -7   0   8      398.73      325.08     10.84 o 
  -6   0   8      152.42       93.56     11.46 o 
  -5   0   8        8.44      119.94     10.26 o 
  -4   0   8      633.55      597.24     41.50 o 
  -3   0   8     1313.29     1431.96     85.02 o 
  -2   0   8      546.32      523.42     15.53 o 
  -1   0   8     2213.38     2122.56     95.21 o 
   0   0   8     3114.02     3218.33     90.99 o 
   1   0   8     1104.00     1001.75     27.05 o 
   2   0   8     3201.00     2747.22    101.42 o 
   3   0   8     6083.32     5909.18    250.25 o 
   4   0   8       15.98       17.01      7.74 o 
   5   0   8      129.44      373.58     13.85 o 
   6   0   8      681.89      725.41     24.14 o 
   7   0   8      803.70      707.34     23.22 o 
   8   0   8      322.97      291.85     10.55 o 
   9   0   8      177.97      195.32     13.26 o 
  10   0   8        1.24       30.60     11.58 o 
  -9   1   8        0.09      -10.77     10.77 o 
  -8   1   8      342.14      325.52     17.49 o 
  -7   1   8      236.94      246.43     10.56 o 
  -6   1   8      487.92      522.30     14.32 o 
  -5   1   8        1.15       15.68      9.99 o 
  -4   1   8      976.60      838.59     24.23 o 
  -3   1   8      584.54      513.76     15.24 o 
  -2   1   8       30.18        5.56      4.24 o 
  -1   1   8      219.94      155.18      6.68 o 
   0   1   8      223.49      376.12      9.74 o 
   1   1   8      165.68      144.45      6.68 o 
   2   1   8      164.40      500.15     68.55 o 
   3   1   8     4871.47     4532.50     90.92 o 
   4   1   8      389.52      252.51     37.17 o 
   5   1   8       16.02       28.29      8.12 o 
   6   1   8     3285.08     2903.43    206.18 o 
   7   1   8      344.78      303.23     12.03 o 
   8   1   8      252.19      205.52      9.80 o 
   9   1   8       63.21       65.92     11.24 o 
  10   1   8      324.57      342.55     23.53 o 
  11   1   8       14.69       22.30     15.35 o 
  -9   2   8       13.78        6.35     11.60 o 
  -8   2   8        1.72       52.56     19.13 o 
  -7   2   8      737.79      670.93     22.09 o 
  -6   2   8      402.94      335.55     10.98 o 
  -5   2   8      141.71      135.07     11.46 o 
  -4   2   8     3352.03     2866.47     59.68 o 
  -3   2   8      633.90      646.78     19.92 o 
  -2   2   8        9.99       18.62      4.71 o 
  -1   2   8       77.63       80.93      5.45 o 
   0   2   8     5889.28     5847.07    125.74 o 
   1   2   8      819.23     1015.25     27.34 o 
   2   2   8     9274.18     9144.51    129.53 o 
   3   2   8     1270.94     1204.53     90.44 o 
   4   2   8        5.16        7.15     11.87 o 
   5   2   8     2354.13     2254.66    146.33 o 
   6   2   8     1391.85     1382.92     44.42 o 
   7   2   8      533.07      628.24     18.55 o 
   8   2   8       12.74       11.63      7.06 o 
   9   2   8      185.56      170.05     13.24 o 
  10   2   8       74.15      112.13     19.30 o 
  11   2   8       27.08       32.97     13.63 o 
  -9   3   8       28.60       17.87     11.69 o 
  -8   3   8      392.54      406.52     19.13 o 
  -7   3   8       12.95      -11.84     11.84 o 
  -6   3   8       73.85       86.07      7.07 o 
  -5   3   8        1.66       56.87     16.98 o 
  -4   3   8     3172.93     2934.82     58.84 o 
  -3   3   8      459.22      552.81     16.10 o 
  -2   3   8      401.76      516.24     32.47 o 
  -1   3   8     4108.09     3685.91     90.78 o 
   0   3   8      654.46      898.92     43.79 o 
   1   3   8      178.58      168.10      6.65 o 
   3   3   8     3453.49     3422.11     77.84 o 
   4   3   8      262.48      406.63     11.99 o 
   5   3   8      211.55      215.83      8.62 o 
   6   3   8     1786.63     1644.44     47.53 o 
   7   3   8       28.30       27.53      6.86 o 
   8   3   8      305.43      359.46     11.70 o 
   9   3   8       22.91        9.86     11.15 o 
  10   3   8      310.76      356.64     18.32 o 
  11   3   8       89.62       54.64     13.87 o 
  -8   4   8       26.28       26.65     11.37 o 
  -7   4   8      420.46      386.51     20.80 o 
  -6   4   8       90.63       51.45      6.69 o 
  -5   4   8        1.72       26.26     14.94 o 
  -4   4   8      584.23      479.93     19.44 o 
  -3   4   8        4.33       98.50      7.28 o 
  -2   4   8      174.63      165.55     10.33 o 
  -1   4   8      775.30      884.24     39.32 o 
   0   4   8     3426.83     3324.92    278.11 o 
   1   4   8      902.64     1065.58     27.31 o 
   2   4   8     3167.02     3254.07    150.36 o 
   3   4   8     1890.91     1811.23     78.57 o 
   4   4   8       32.89      132.35     12.89 o 
   5   4   8      624.24      596.54     16.77 o 
   6   4   8      153.14      147.64      9.71 o 
   7   4   8       73.62       63.41      7.29 o 
   8   4   8       72.82       81.78      7.85 o 
   9   4   8      966.16      964.18     61.93 o 
  10   4   8        1.33       26.63     11.41 o 
  11   4   8       10.65       13.84     11.32 o 
  -8   5   8      323.47      285.35     17.37 o 
  -7   5   8      210.83      153.75     15.61 o 
  -6   5   8       21.10       19.08     10.25 o 
  -5   5   8      438.24      431.25     11.40 o 
  -4   5   8     1365.58     1370.92     35.04 o 
  -3   5   8      476.92      547.42     17.70 o 
  -2   5   8       10.77       12.71      4.19 o 
  -1   5   8     6181.76     5573.84    219.89 o 
   0   5   8      109.76      181.04      8.79 o 
   1   5   8       63.02       95.87      6.76 o 
   2   5   8      654.03     1165.13     30.02 o 
   3   5   8     1771.22     1853.02     56.13 o 
   4   5   8      145.55      124.83      7.34 o 
   5   5   8      658.03      686.03     33.35 o 
   6   5   8      957.63      974.36     23.40 o 
   7   5   8      509.81      540.39     13.45 o 
   8   5   8        4.21        0.12      9.00 o 
   9   5   8       25.23       71.50     11.79 o 
  10   5   8      278.53      317.86     18.66 o 
  11   5   8        1.41       17.35     19.10 o 
  -7   6   8      665.97      669.89     32.02 o 
  -6   6   8        0.10       -1.21      7.43 o 
  -5   6   8      444.57      424.99     21.25 o 
  -4   6   8      939.58      865.81     26.34 o 
  -3   6   8      104.92      268.39     10.30 o 
  -2   6   8      199.42      185.39     11.25 o 
  -1   6   8      217.98      101.42     40.92 o 
   0   6   8     1358.34     1516.55     43.04 o 
   1   6   8       63.35       61.76      6.58 o 
   2   6   8     1803.28     1555.90     49.30 o 
   3   6   8      847.29      724.35     27.96 o 
   4   6   8        1.70       98.39     11.59 o 
   5   6   8     1396.31     1543.46     43.50 o 
   6   6   8      354.00      332.10     10.47 o 
   7   6   8        1.38      171.91      8.81 o 
   8   6   8       14.10       18.59      6.11 o 
   9   6   8      655.36      673.04     20.59 o 
  10   6   8       94.38      102.37     15.52 o 
  11   6   8       11.55        5.40     13.73 o 
  -7   7   8        1.01        2.32      9.54 o 
  -6   7   8       56.92       39.96     12.14 o 
  -5   7   8      525.46      519.68     20.63 o 
  -4   7   8      280.62      264.36      9.32 o 
  -3   7   8      227.28      271.58      9.55 o 
  -2   7   8      277.28      286.24     11.46 o 
  -1   7   8     3582.43     3400.41     59.57 o 
   0   7   8       29.16       33.78      9.55 o 
   1   7   8       21.53       30.26      8.29 o 
   2   7   8      294.26      335.66     20.56 o 
   3   7   8      434.33      472.76     13.85 o 
   4   7   8       81.87      109.54     10.57 o 
   5   7   8       81.74       58.21      6.44 o 
   6   7   8     1816.09     1756.35     66.43 o 
   7   7   8        2.80       66.12      7.40 o 
   8   7   8      454.72      492.89     15.72 o 
   9   7   8      110.92      128.18     33.08 o 
  10   7   8      336.43      323.62     44.20 o 
  -6   8   8       13.92       24.97     15.72 o 
  -5   8   8      377.43      352.27     16.24 o 
  -4   8   8      725.71      642.55     28.92 o 
  -3   8   8       50.92       63.42      6.52 o 
  -2   8   8      605.53      608.10     17.46 o 
  -1   8   8       19.23       27.18      5.54 o 
   0   8   8     2360.46     2460.02     65.17 o 
   1   8   8     1091.65     1143.87     36.59 o 
   2   8   8      912.52      915.55     26.53 o 
   3   8   8      352.55      296.60      9.24 o 
   4   8   8      272.34      309.18     13.47 o 
   5   8   8      949.27      947.06     62.31 o 
   6   8   8      147.81      109.07      8.82 o 
   7   8   8      136.99      151.59      8.47 o 
   8   8   8      188.64      194.08     14.42 o 
   9   8   8      405.56      398.83     17.01 o 
  10   8   8      143.90      143.74     16.27 o 
  -5   9   8      505.05      503.99     19.65 o 
  -4   9   8       62.63       48.12     10.42 o 
  -3   9   8       82.39      104.79     11.88 o 
  -2   9   8       29.70       50.80      5.88 o 
  -1   9   8      704.80      839.33     35.94 o 
   0   9   8      216.37      233.47      8.66 o 
   1   9   8        6.80       -0.93      4.64 o 
   2   9   8      312.66      251.42     21.08 o 
   3   9   8      292.27      270.62     11.36 o 
   4   9   8       14.40       13.93     13.50 o 
   5   9   8      259.48      276.36      9.63 o 
   6   9   8     1662.31     1733.77     32.47 o 
   7   9   8       31.47       37.46     12.75 o 
   8   9   8      287.19      303.17     44.78 o 
   9   9   8      333.18      392.68     30.49 o 
  10   9   8        1.42       13.05     11.22 o 
  -4  10   8      642.71      635.35     19.97 o 
  -3  10   8       17.81       26.01     15.58 o 
  -2  10   8       25.61       26.97      9.51 o 
  -1  10   8       21.28       12.88     24.11 o 
   0  10   8        4.62        2.44      5.42 o 
   1  10   8        0.99       -5.27      5.27 o 
   2  10   8      801.96      807.22     23.62 o 
   3  10   8      486.62      445.64     11.16 o 
   4  10   8        0.04       20.23      6.91 o 
   5  10   8     1686.98     1770.79     30.56 o 
   6  10   8       51.06       40.58     21.79 o 
   7  10   8      173.15      223.02     40.58 o 
   8  10   8      107.62       99.05     30.79 o 
   9  10   8       95.57      120.04     17.77 o 
  -3  11   8        0.06       -3.40     10.07 o 
  -2  11   8       34.97       11.98     12.24 o 
  -1  11   8      482.61      495.25     31.27 o 
   0  11   8        6.36        9.31      7.45 o 
   1  11   8      171.86      205.36     12.38 o 
   2  11   8      423.92      465.17     16.73 o 
   3  11   8      305.96      338.58     16.71 o 
   4  11   8       19.96        9.86      9.41 o 
   5  11   8       38.48       33.89      9.54 o 
   6  11   8      312.33      314.82     14.81 o 
   7  11   8      137.72       90.71     14.06 o 
   8  11   8       41.55       47.21     12.75 o 
   9  11   8       73.74       87.06     19.00 o 
  -2  12   8      394.86      350.90     16.44 o 
  -1  12   8       83.41       71.43     10.60 o 
   0  12   8       15.79       -1.74     10.23 o 
   1  12   8      141.79      163.81     12.00 o 
   2  12   8      373.13      332.52     16.35 o 
   3  12   8      759.58      717.57     19.99 o 
   4  12   8       46.16       47.49     10.72 o 
   5  12   8      468.53      493.02     42.01 o 
   6  12   8      143.53      171.64     31.51 o 
   7  12   8       98.16       72.74     12.60 o 
   8  12   8      140.53      168.56     21.25 o 
   0  13   8        7.73        5.57      8.31 o 
   1  13   8      145.05      157.48     14.37 o 
   2  13   8      345.46      317.37     40.21 o 
   3  13   8      211.61      173.94     21.62 o 
   4  13   8      110.72      122.21     12.58 o 
   5  13   8       12.00       13.95      9.14 o 
   6  13   8       87.13      111.98     13.28 o 
   7  13   8        1.04       -1.13     19.40 o 
   3  14   8       30.06       36.70     10.86 o 
   4  14   8        0.02       10.42     11.90 o 
  -3 -13   9       53.89       51.78     11.26 o 
  -2 -13   9       92.32      105.47     11.77 o 
  -1 -13   9      232.14      267.10     23.22 o 
  -5 -12   9       58.47       73.24     14.56 o 
  -4 -12   9      479.03      520.06     20.63 o 
  -3 -12   9        0.07       -5.23      9.35 o 
  -2 -12   9       78.49       57.91     11.31 o 
  -1 -12   9        4.09       -9.65      9.65 o 
   0 -12   9      411.80      390.37     18.32 o 
   1 -12   9       11.30       20.62      9.91 o 
   2 -12   9      189.78      178.95     15.41 o 
  -7 -11   9       16.05       21.31     11.77 o 
  -6 -11   9       12.45        7.16     13.32 o 
  -5 -11   9       39.81       49.36     17.70 o 
  -4 -11   9       55.90       99.20     11.26 o 
  -3 -11   9      218.50      233.74     22.37 o 
  -2 -11   9       43.64       32.54      9.21 o 
  -1 -11   9      686.61      676.89     37.14 o 
   0 -11   9        7.11        6.37      7.09 o 
   1 -11   9       42.46       16.51     10.37 o 
   2 -11   9        6.34       10.15     12.14 o 
   3 -11   9       38.16       50.67     11.42 o 
  -7 -10   9      220.25      242.15     14.99 o 
  -6 -10   9       37.58       35.16     11.57 o 
  -5 -10   9      241.95      226.83     13.60 o 
  -4 -10   9      797.56      824.94     20.48 o 
  -3 -10   9        0.24       -3.62      7.79 o 
  -2 -10   9      235.48      225.08     12.27 o 
  -1 -10   9       47.60       37.30     12.00 o 
   0 -10   9      335.72      267.59     12.94 o 
   1 -10   9        0.04        9.91      8.39 o 
   2 -10   9      203.03      244.73     14.14 o 
   3 -10   9      120.28      135.31     12.03 o 
   4 -10   9       42.72       10.88     10.43 o 
   5 -10   9      453.90      481.13     21.04 o 
  -8  -9   9      194.38      244.24     17.33 o 
  -7  -9   9      184.61      169.98     15.34 o 
  -6  -9   9        7.76      -10.16     10.16 o 
  -5  -9   9      571.91      527.19     20.97 o 
  -4  -9   9        4.22       51.88      6.92 o 
  -3  -9   9      540.04      537.33     12.06 o 
  -2  -9   9      158.40      141.61      7.89 o 
  -1  -9   9     1058.28      976.86     30.04 o 
   0  -9   9        2.02        1.58      4.53 o 
   1  -9   9      235.36      204.79      8.56 o 
   2  -9   9      113.66      109.85      6.70 o 
   3  -9   9      157.46      181.11     11.79 o 
   4  -9   9        6.23       19.77      9.93 o 
   5  -9   9      123.18      134.42     17.12 o 
   6  -9   9      423.53      466.27     19.87 o 
  -8  -8   9      157.80      153.92     16.11 o 
  -7  -8   9      141.45      133.34     11.96 o 
  -6  -8   9       15.75        9.43      9.61 o 
  -5  -8   9       99.66      114.84      7.53 o 
  -4  -8   9     1680.38     1797.76     44.13 o 
  -3  -8   9        1.02        0.80      6.34 o 
  -2  -8   9        5.61       -3.50      7.50 o 
  -1  -8   9       21.74       48.95      6.20 o 
   0  -8   9       31.19       21.42      5.16 o 
   1  -8   9      101.17       70.38      6.53 o 
   2  -8   9       64.61       58.88     15.28 o 
   3  -8   9      120.80      115.83      7.86 o 
   4  -8   9       75.37       72.48     22.41 o 
   5  -8   9      804.67      843.59     21.84 o 
   6  -8   9       23.91        3.75      8.49 o 
   7  -8   9       25.87       49.69     12.53 o 
  -9  -7   9        5.78        8.25     11.11 o 
  -8  -7   9      242.47      245.39     15.69 o 
  -7  -7   9      739.07      687.62     20.50 o 
  -6  -7   9      598.53      574.43     12.64 o 
  -5  -7   9      479.60      439.91     15.31 o 
  -4  -7   9      414.46      438.54     11.55 o 
  -3  -7   9      112.72      109.66      7.40 o 
  -2  -7   9        4.94        7.96     21.25 o 
  -1  -7   9     1146.32     1234.77     36.11 o 
   0  -7   9      101.55       83.08      6.46 o 
   1  -7   9      929.69      880.27     23.32 o 
   2  -7   9      611.54      568.95     14.15 o 
   3  -7   9      398.93      399.37     11.11 o 
   4  -7   9        7.24        3.15      6.41 o 
   5  -7   9       12.45        2.49      8.73 o 
   6  -7   9      410.95      329.86     27.28 o 
   7  -7   9        1.11        6.16     11.07 o 
  -9  -6   9      263.67      287.56     16.32 o 
  -8  -6   9       21.58       17.87     11.09 o 
  -7  -6   9      287.96      282.04     15.01 o 
  -6  -6   9        1.27       -0.67      6.09 o 
  -5  -6   9      848.10      873.04     21.58 o 
  -4  -6   9      108.40       61.70     14.56 o 
  -3  -6   9        8.96       26.45      6.21 o 
  -2  -6   9     1319.23     1407.33     40.40 o 
  -1  -6   9       26.74       18.83      5.54 o 
   0  -6   9      169.61      185.09     13.37 o 
   1  -6   9      561.21      571.11     14.14 o 
   2  -6   9     1710.17     1744.09     43.11 o 
   3  -6   9     1185.60     1159.60     34.09 o 
   4  -6   9      254.18      338.10     10.82 o 
   5  -6   9      167.95      127.33      7.63 o 
   6  -6   9       13.15        9.38     26.33 o 
   7  -6   9      202.48      217.76     14.76 o 
   8  -6   9       52.37       73.34     14.14 o 
  -9  -5   9       38.20       50.49     11.35 o 
  -8  -5   9      540.37      520.95     18.28 o 
  -7  -5   9       50.30       55.94      9.11 o 
  -6  -5   9       56.54       75.00      7.45 o 
  -5  -5   9     1173.06     1024.89     32.40 o 
  -4  -5   9      198.71      211.90      8.64 o 
  -3  -5   9     2584.90     2625.88     56.78 o 
  -2  -5   9      269.64      402.68     10.70 o 
  -1  -5   9     1161.67     1116.24     27.32 o 
   0  -5   9        3.35       -4.18      5.08 o 
   1  -5   9     1245.74     1285.14     95.73 o 
   2  -5   9     1259.42     1200.90     38.65 o 
   3  -5   9      767.96      714.09     20.43 o 
   4  -5   9       66.46       52.67      8.59 o 
   5  -5   9      610.38      539.29     13.67 o 
   6  -5   9       31.58       45.34      6.17 o 
   7  -5   9       86.50       73.59     13.98 o 
   8  -5   9      363.75      355.35     21.45 o 
  -9  -4   9      296.59      359.67     21.45 o 
  -8  -4   9      165.77      197.82     14.64 o 
  -7  -4   9        0.44       17.96      7.23 o 
  -6  -4   9      992.02      983.76     33.35 o 
  -5  -4   9        8.03        4.67      8.19 o 
  -4  -4   9      347.83      298.26     21.76 o 
  -3  -4   9      121.02      127.90      7.58 o 
  -2  -4   9     3136.97     3515.12     70.44 o 
  -1  -4   9     1055.77     1126.25     29.38 o 
   0  -4   9      791.67      682.43     27.01 o 
   1  -4   9      503.52      415.47     12.66 o 
   2  -4   9      734.79      637.69     17.24 o 
   3  -4   9      972.55      969.14     42.53 o 
   4  -4   9      533.87      487.36     13.41 o 
   5  -4   9      739.93      833.35     31.24 o 
   6  -4   9        0.30        6.75      6.00 o 
   7  -4   9      101.21       39.99     27.83 o 
   8  -4   9      423.39      428.18     18.59 o 
   9  -4   9      259.31      253.93     15.60 o 
  -9  -3   9       64.97       52.99     13.88 o 
  -8  -3   9      495.37      463.00     17.92 o 
  -7  -3   9        6.36       22.74      6.36 o 
  -6  -3   9      404.55      393.05     12.25 o 
  -5  -3   9     2275.31     2580.20     87.61 o 
  -4  -3   9      191.18      223.45      8.63 o 
  -3  -3   9      212.80      292.52      9.15 o 
  -2  -3   9     1238.30     1451.46     41.47 o 
  -1  -3   9     5860.15     6109.55    120.96 o 
   0  -3   9     1118.69     1423.85     55.25 o 
   1  -3   9     1411.49     1245.80     32.08 o 
   2  -3   9     1562.26     1595.61     50.43 o 
   3  -3   9        0.42       -3.54      5.81 o 
   4  -3   9     1400.04     1448.43     43.91 o 
   5  -3   9       51.95       48.35      6.75 o 
   6  -3   9       93.76       93.24     11.42 o 
   7  -3   9      185.52      125.40     16.44 o 
   8  -3   9      895.05      919.83     38.91 o 
   9  -3   9      265.79      269.79     23.12 o 
  -9  -2   9      260.04      287.80     20.15 o 
  -8  -2   9       93.74      115.35     12.71 o 
  -7  -2   9       59.73      112.97      7.77 o 
  -6  -2   9     2148.10     2232.02     56.00 o 
  -5  -2   9      323.59      268.98      9.75 o 
  -4  -2   9      514.47      538.34     15.99 o 
  -3  -2   9       26.62       55.66     23.77 o 
  -2  -2   9     5050.54     4958.92     91.28 o 
  -1  -2   9      816.20      853.84     34.61 o 
   0  -2   9      158.18      188.33      7.68 o 
   1  -2   9      175.87      114.14      6.60 o 
   2  -2   9      106.16      105.50      6.19 o 
   3  -2   9      624.74      532.06     26.09 o 
   4  -2   9       91.28      106.58      7.15 o 
   5  -2   9     2890.52     2966.98     71.27 o 
   6  -2   9       60.86       54.64      6.84 o 
   7  -2   9      389.00      328.18     16.78 o 
   8  -2   9      422.81      407.33     18.21 o 
   9  -2   9      225.31      202.70     15.00 o 
  10  -2   9        0.56      -11.23     11.23 o 
  -9  -1   9       78.21       94.56     14.53 o 
  -8  -1   9      611.05      555.92     20.41 o 
  -7  -1   9       17.90       17.54      6.88 o 
  -6  -1   9      140.50      108.92      8.29 o 
  -5  -1   9     1281.66     1121.78     36.52 o 
  -4  -1   9       11.60       19.83      5.95 o 
  -3  -1   9      103.16       77.43      7.03 o 
  -2  -1   9     1105.84     1232.52     30.88 o 
  -1  -1   9     8220.89     7658.54    275.00 o 
   0  -1   9       19.14      210.21     42.87 o 
   1  -1   9       48.21       36.75      4.51 o 
   2  -1   9      181.65      100.86      6.80 o 
   3  -1   9        3.54        3.19      5.85 o 
   4  -1   9     1675.45     1455.28     48.39 o 
   5  -1   9      304.31      287.24     14.56 o 
   6  -1   9      424.81      361.81     26.87 o 
   7  -1   9       31.41       68.70     30.25 o 
   8  -1   9      298.91      326.13     10.71 o 
   9  -1   9       52.79       65.21     13.34 o 
  10  -1   9       26.74       33.96     31.10 o 
  -9   0   9      328.26      348.59     21.89 o 
  -8   0   9      146.09      180.50     19.54 o 
  -7   0   9      153.28      163.38      8.34 o 
  -6   0   9     1326.81     1072.93     31.80 o 
  -5   0   9       23.11       33.64      6.73 o 
  -4   0   9     1635.37     1537.48     46.92 o 
  -3   0   9      168.96      112.28     16.47 o 
  -2   0   9     1965.31     1862.79     57.03 o 
  -1   0   9     1185.24     1375.91     36.32 o 
   0   0   9      348.07      400.83     16.06 o 
   1   0   9     1900.39     1812.82     60.25 o 
   2   0   9      550.16      512.87     28.51 o 
   3   0   9      176.69      178.43     12.28 o 
   4   0   9      254.78      358.53     10.82 o 
   5   0   9     6387.18     6735.05    125.26 o 
   6   0   9       96.18      115.80      9.34 o 
   7   0   9      969.33     1008.36     32.16 o 
   8   0   9      633.47      585.11     13.85 o 
   9   0   9      171.94      172.05     45.25 o 
  10   0   9        2.75       -0.27     20.67 o 
  -9   1   9      136.03       81.02     28.58 o 
  -8   1   9        2.00        8.02     15.38 o 
  -7   1   9       30.33       19.89      6.10 o 
  -6   1   9        4.81        5.58      6.72 o 
  -5   1   9     2152.45     2177.03     46.85 o 
  -4   1   9      227.78      137.27      8.63 o 
  -3   1   9      891.95      875.32     59.27 o 
  -2   1   9        3.99      162.94     15.52 o 
  -1   1   9       21.05       15.04      4.80 o 
   0   1   9     1628.33     1650.39     77.14 o 
   1   1   9     5757.92     5763.22    110.66 o 
   2   1   9      747.94      732.46     19.76 o 
   3   1   9       22.51       20.83      6.75 o 
   4   1   9     6790.20     6832.86    104.18 o 
   5   1   9      141.65      194.02      8.79 o 
   6   1   9     1656.86     1508.76     43.91 o 
   8   1   9      106.15      116.18      8.15 o 
   9   1   9        4.15       18.07     10.75 o 
  10   1   9        3.61        0.39     11.11 o 
  -9   2   9       96.03       81.64     12.92 o 
  -8   2   9      157.77      144.79     15.60 o 
  -7   2   9      195.73      163.63     17.63 o 
  -6   2   9      166.34      215.87      9.63 o 
  -5   2   9      106.05      121.14     19.57 o 
  -4   2   9       60.98       65.88      8.66 o 
  -3   2   9      504.16      662.87     76.15 o 
  -2   2   9     1348.40     1399.01     63.50 o 
  -1   2   9       81.45      140.07      6.87 o 
   0   2   9      588.41      515.13     15.53 o 
   1   2   9     6618.35     6454.97    106.21 o 
   2   2   9     1688.59     1812.69    106.81 o 
   3   2   9     1082.95      983.64     47.78 o 
   4   2   9     1163.01     1061.91     27.85 o 
   5   2   9     2508.41     2967.97     66.01 o 
   6   2   9        0.13        6.87      7.78 o 
   7   2   9        6.12       45.78      8.15 o 
   8   2   9      136.83      136.51      9.00 o 
   9   2   9       33.91       46.53     10.32 o 
  10   2   9      230.55      199.13     15.97 o 
  11   2   9        4.28       15.96     30.73 o 
  -8   3   9      140.05       95.79     14.63 o 
  -7   3   9        0.39       -9.14      9.14 o 
  -6   3   9        5.84        9.04      5.19 o 
  -5   3   9     1302.51     1227.06     50.74 o 
  -4   3   9      222.60      201.47      9.65 o 
  -3   3   9     1655.84     1520.50     44.46 o 
  -2   3   9      592.41      468.68     12.93 o 
  -1   3   9       10.18      -10.82     16.34 o 
   0   3   9     4739.39     4548.25    120.62 o 
   1   3   9     3622.43     3986.49     82.88 o 
   2   3   9     6903.96     6646.29    271.76 o 
   3   3   9      341.46      291.75      8.90 o 
   4   3   9     2686.50     2190.11     58.06 o 
   5   3   9        2.28       89.39      7.28 o 
   6   3   9       16.71        4.25      5.23 o 
   7   3   9      120.86      228.11     24.86 o 
   8   3   9      298.56      275.50     10.74 o 
   9   3   9       29.20       42.35     10.77 o 
  10   3   9       52.05       33.19     11.78 o 
  11   3   9      575.35      519.39     25.10 o 
  -8   4   9      191.00      206.34     15.54 o 
  -7   4   9        0.17      -12.89     12.89 o 
  -6   4   9      182.10      162.02     12.07 o 
  -5   4   9      171.65      140.03      8.51 o 
  -4   4   9      372.53      370.13     12.58 o 
  -3   4   9      379.90      425.71     13.68 o 
  -2   4   9     2527.83     2390.94     58.49 o 
  -1   4   9       84.98       53.52     18.55 o 
   0   4   9     1210.77     1229.84     30.44 o 
   1   4   9     2047.04     1998.61     58.48 o 
   2   4   9      788.42      813.13     43.38 o 
   3   4   9      500.48      445.38     11.86 o 
   4   4   9      124.94      172.80      8.06 o 
   5   4   9      485.85      579.58     76.83 o 
   6   4   9        8.63       19.00     12.17 o 
   7   4   9      513.35      454.26     16.68 o 
   8   4   9     1526.93     1541.25     31.95 o 
   9   4   9       10.58       63.02     11.00 o 
  10   4   9      202.99      204.76     31.00 o 
  11   4   9        7.59      -13.88     13.88 o 
  -7   5   9       91.13      107.50     15.69 o 
  -6   5   9       21.15       31.98     10.70 o 
  -5   5   9       12.42       14.08      5.66 o 
  -4   5   9       87.67       72.23      7.89 o 
  -3   5   9     3903.67     3753.21     58.18 o 
  -2   5   9      351.43      331.17     10.17 o 
  -1   5   9      247.60      113.34     24.28 o 
   0   5   9     1851.24     1702.56    140.16 o 
   1   5   9        3.25        5.28      4.00 o 
   2   5   9     1590.18     1522.29     49.91 o 
   3   5   9       10.23        2.49      6.07 o 
   4   5   9     2323.99     2130.60     53.17 o 
   5   5   9       92.74      243.60     69.57 o 
   6   5   9      461.21      479.59     26.60 o 
   7   5   9      446.78      472.01     12.85 o 
   8   5   9      325.50      296.78     23.67 o 
   9   5   9      241.64      285.50     32.50 o 
  10   5   9        6.41       -6.61     17.94 o 
  11   5   9      312.51      263.50     17.98 o 
  -7   6   9      125.65       75.30     18.72 o 
  -6   6   9     1009.13      941.19     31.10 o 
  -5   6   9       21.31       26.38     10.56 o 
  -4   6   9       76.12       65.44      7.09 o 
  -3   6   9     1121.49     1300.71     32.34 o 
  -2   6   9     1735.89     1789.00     42.76 o 
  -1   6   9      275.80      183.36     24.59 o 
   0   6   9      432.61      508.00     15.48 o 
   1   6   9      848.39      755.72     19.28 o 
   2   6   9      157.11      210.40     17.29 o 
   3   6   9       54.78       55.33      6.43 o 
   4   6   9        5.63       60.55      9.86 o 
   5   6   9      457.17      631.17    105.27 o 
   6   6   9       36.53      199.27    115.78 o 
   7   6   9     1417.33     1257.68     45.42 o 
   8   6   9      472.33      330.35    196.94 o 
   9   6   9      166.53      233.13     14.78 o 
  10   6   9      321.36      335.93     55.11 o 
  -6   7   9       94.71      115.43     15.79 o 
  -5   7   9      184.75      188.27     17.26 o 
  -4   7   9        0.60      -14.43     14.43 o 
  -3   7   9      677.07      617.78     30.04 o 
  -2   7   9      332.45      285.81      9.43 o 
  -1   7   9       71.08       89.71      7.79 o 
   0   7   9      677.88      548.31     13.26 o 
   1   7   9     1261.81     1213.50     37.19 o 
   2   7   9       17.91       28.12      5.49 o 
   3   7   9        2.45       12.15      5.96 o 
   4   7   9     2659.15     2832.14     51.63 o 
   5   7   9      277.61      283.08     11.14 o 
   6   7   9       52.32       56.54      9.65 o 
   7   7   9      704.43      761.75     23.36 o 
   8   7   9       86.27       94.95     12.79 o 
   9   7   9       12.74       31.51     11.99 o 
  10   7   9       11.43       -0.15     11.70 o 
  -6   8   9      530.67      550.14     38.64 o 
  -5   8   9       18.00        3.96     10.59 o 
  -4   8   9       61.61       69.23     11.08 o 
  -3   8   9       75.99      116.84     16.81 o 
  -2   8   9       25.51       29.31      6.00 o 
  -1   8   9       39.31       39.58      8.05 o 
   0   8   9       89.50       87.95      6.39 o 
   1   8   9     1315.05     1497.02     36.71 o 
   2   8   9        9.78        3.34      5.57 o 
   3   8   9      456.95      482.10     12.01 o 
   4   8   9      220.20      244.13      9.93 o 
   5   8   9      302.33      338.77     10.86 o 
   6   8   9        2.21       29.70     10.37 o 
   7   8   9      484.77      485.96     19.51 o 
   8   8   9      674.60      762.29     53.20 o 
   9   8   9       21.82       41.12     12.75 o 
  10   8   9       64.79       59.36     12.31 o 
  -5   9   9      142.16      103.42     16.44 o 
  -4   9   9       70.59       54.48     42.22 o 
  -3   9   9      309.82      317.84     13.79 o 
  -2   9   9      202.35      160.99     11.12 o 
  -1   9   9        0.42       35.67     14.70 o 
   0   9   9      605.49      689.02     16.62 o 
   1   9   9        3.56        0.51      6.48 o 
   2   9   9       12.88       -1.26      7.06 o 
   3   9   9       82.81       89.22     10.81 o 
   4   9   9     1702.87     1896.68     56.88 o 
   5   9   9      103.95       87.81      7.44 o 
   6   9   9       34.57       46.55      6.48 o 
   7   9   9      603.43      627.17     27.04 o 
   8   9   9       95.38       98.96     14.67 o 
   9   9   9       39.25       45.67     11.61 o 
  10   9   9        4.68        0.27     12.35 o 
  -4  10   9       85.65       91.93     27.21 o 
  -3  10   9      200.90      215.25     14.42 o 
  -2  10   9       67.53       75.95     10.27 o 
  -1  10   9       90.94       91.40     33.49 o 
   0  10   9      387.88      334.15     22.51 o 
   1  10   9      520.05      493.91     16.34 o 
   2  10   9       60.60       46.76     24.35 o 
   3  10   9     1939.15     1838.04     30.33 o 
   4  10   9       51.43       73.01      6.92 o 
   5  10   9      181.89      196.62      8.83 o 
   6  10   9       70.36      149.13     21.14 o 
   7  10   9      580.36      624.02     44.81 o 
   8  10   9      223.75      235.96     17.36 o 
   9  10   9        3.95        4.29     10.84 o 
  -3  11   9      242.45      225.73     14.92 o 
  -2  11   9        3.97       -2.77     10.47 o 
  -1  11   9       37.16       35.94     13.27 o 
   0  11   9      577.71      511.17     16.49 o 
   1  11   9       40.01       12.70      8.53 o 
   2  11   9       13.20       -9.03      9.03 o 
   3  11   9      134.30      141.53     12.96 o 
   4  11   9     1257.90     1359.46     25.88 o 
   5  11   9       21.72       46.72     21.28 o 
   6  11   9       43.36       65.69     21.21 o 
   7  11   9      180.82      166.51     17.87 o 
   8  11   9       81.70       63.56     17.56 o 
  -2  12   9       16.82       22.04     10.49 o 
  -1  12   9      164.04      147.09     29.33 o 
   0  12   9       22.56        7.48      8.97 o 
   1  12   9      309.66      268.93     14.37 o 
   2  12   9       72.47       67.97     17.60 o 
   3  12   9      431.76      483.82     18.73 o 
   4  12   9      141.59      141.41     12.82 o 
   5  12   9       53.00       48.44     12.19 o 
   6  12   9      147.86      167.29     17.39 o 
   7  12   9       44.69        9.90     12.83 o 
   0  13   9      614.70      555.91     24.35 o 
   1  13   9       26.63       16.03      9.47 o 
   2  13   9        2.10        7.57      9.41 o 
   3  13   9       22.35       14.60      9.19 o 
   4  13   9      282.43      324.86     16.85 o 
   5  13   9        4.20       11.81     11.25 o 
   6  13   9      200.09      219.75     30.93 o 
  -5 -12  10       11.75       27.96     15.76 o 
  -4 -12  10       18.04       35.09     10.34 o 
  -3 -12  10       30.97       37.27     10.93 o 
  -2 -12  10      144.53      149.78     13.72 o 
  -1 -12  10      104.65       92.62     18.69 o 
   0 -12  10      232.38      211.88     14.23 o 
   1 -12  10      253.40      274.83     16.03 o 
  -6 -11  10       62.97       53.11     11.57 o 
  -5 -11  10       81.06       69.18     11.02 o 
  -4 -11  10       18.07       17.82     15.65 o 
  -3 -11  10      560.41      596.35     19.27 o 
  -2 -11  10      262.89      293.45     16.71 o 
  -1 -11  10       16.73       -2.93      8.78 o 
   0 -11  10      171.46      169.52     13.45 o 
   1 -11  10      228.01      211.08     14.83 o 
   2 -11  10        4.60       -1.77      8.72 o 
   3 -11  10       20.28        4.92     17.36 o 
  -7 -10  10        1.54      -10.15     10.15 o 
  -6 -10  10      476.85      475.31     23.43 o 
  -5 -10  10        0.16      -10.43     10.43 o 
  -4 -10  10       31.33       26.07     10.01 o 
  -3 -10  10      205.56      213.87     12.98 o 
  -2 -10  10      173.87      214.80     12.72 o 
  -1 -10  10      409.44      341.16     15.12 o 
   0 -10  10      277.35      204.05     12.96 o 
   1 -10  10      338.77      372.40     22.81 o 
   2 -10  10       80.39       72.43      9.98 o 
   3 -10  10      265.84      235.69     15.96 o 
   4 -10  10      131.64      118.77     12.80 o 
  -8  -9  10       71.53       96.69     14.40 o 
  -7  -9  10       61.98       77.20     13.50 o 
  -6  -9  10        3.73      -13.39     15.41 o 
  -5  -9  10      111.73      135.18     15.14 o 
  -4  -9  10       22.09       72.77     15.79 o 
  -3  -9  10      506.26      563.86     32.43 o 
  -2  -9  10      319.34      283.69      9.21 o 
  -1  -9  10      195.59      195.76     46.93 o 
   0  -9  10      812.27      854.01     22.42 o 
   1  -9  10        8.16        8.73      4.39 o 
   2  -9  10       38.88       26.55      8.47 o 
   3  -9  10        0.15        1.65      8.20 o 
   4  -9  10      522.23      553.05     18.91 o 
   5  -9  10       99.80      104.71     15.77 o 
  -8  -8  10       68.87       67.74     23.80 o 
  -7  -8  10       44.21       54.36     10.92 o 
  -6  -8  10      204.86      258.69     23.70 o 
  -5  -8  10      114.51       95.90     10.66 o 
  -4  -8  10     1445.18     1504.90     39.12 o 
  -3  -8  10      467.24      533.43     12.10 o 
  -2  -8  10      406.23      352.65     11.04 o 
  -1  -8  10      322.87      265.12     17.26 o 
   0  -8  10      522.17      582.93     13.73 o 
   1  -8  10      441.70      367.77     12.31 o 
   2  -8  10       12.99       19.13      4.96 o 
   3  -8  10      214.76      249.12     12.68 o 
   4  -8  10       32.17       38.85      9.26 o 
   5  -8  10      121.50      119.88     12.21 o 
   6  -8  10        3.68       10.20     10.50 o 
  -8  -7  10       66.71       69.44     11.39 o 
  -7  -7  10      605.93      693.90     20.71 o 
  -6  -7  10        1.92        9.90      8.93 o 
  -5  -7  10        0.97        3.09      4.97 o 
  -4  -7  10      173.97      190.53     17.39 o 
  -3  -7  10     1504.28     1341.24     55.52 o 
  -2  -7  10       21.52       26.51      5.71 o 
  -1  -7  10       78.76       98.19     16.71 o 
   0  -7  10     1439.53     1378.09     37.65 o 
   1  -7  10       12.52        3.31      5.25 o 
   2  -7  10      114.35       88.17      6.84 o 
   3  -7  10      128.16      164.87     21.25 o 
   4  -7  10     1011.23     1123.10     23.46 o 
   5  -7  10       79.20       65.81     11.77 o 
   6  -7  10      434.70      430.78     18.25 o 
   7  -7  10      127.30      165.59     16.92 o 
  -9  -6  10       74.83       75.65     13.57 o 
  -8  -6  10       15.15        9.34     10.31 o 
  -7  -6  10       77.37      176.41     23.53 o 
  -6  -6  10     2302.91     2338.93     32.64 o 
  -5  -6  10      101.57      111.68      7.84 o 
  -4  -6  10     1130.89     1197.20     31.78 o 
  -3  -6  10      418.54      406.69     17.22 o 
  -2  -6  10      167.20      285.48     17.36 o 
  -1  -6  10      549.87      519.07     14.68 o 
   0  -6  10      543.91      514.09     13.87 o 
   2  -6  10        6.04       27.21      5.54 o 
   3  -6  10     1289.96     1578.57     36.72 o 
   4  -6  10      453.48      455.83     11.66 o 
   5  -6  10      232.14      215.31     12.62 o 
   6  -6  10      110.18      122.70     11.81 o 
   7  -6  10      223.56      206.54     16.10 o 
   8  -6  10       28.41       35.44     13.13 o 
  -9  -5  10      276.75      338.64     19.55 o 
  -8  -5  10       48.55       35.97     11.61 o 
  -7  -5  10      514.21      571.56     34.24 o 
  -6  -5  10        6.36        9.42      5.73 o 
  -5  -5  10      157.29      105.06      8.68 o 
  -4  -5  10      164.63      116.02      7.46 o 
  -3  -5  10      864.59      864.95     21.43 o 
  -2  -5  10      122.53      150.48      8.63 o 
  -1  -5  10       47.33       65.69      6.19 o 
   0  -5  10     2248.12     2402.56     55.56 o 
   1  -5  10      177.83      169.47     15.04 o 
   2  -5  10        9.16        8.08      5.32 o 
   4  -5  10     2599.55     2432.82     43.12 o 
   5  -5  10        9.42       -8.42      8.42 o 
   6  -5  10      170.42      207.94     12.81 o 
   7  -5  10     1000.56      976.16     61.62 o 
   8  -5  10      156.78      163.37     15.07 o 
  -9  -4  10        7.32       17.26     13.80 o 
  -8  -4  10        0.39       -9.82      9.82 o 
  -7  -4  10        3.17       38.42     15.79 o 
  -6  -4  10      219.59      199.32     15.72 o 
  -5  -4  10       76.99       70.58     16.16 o 
  -4  -4  10     1130.04     1090.29     34.10 o 
  -3  -4  10      486.65      490.79     13.00 o 
  -2  -4  10      118.77      216.73     12.31 o 
  -1  -4  10     1003.54      941.62     38.88 o 
   0  -4  10      481.47      566.63     14.81 o 
   1  -4  10     4373.09     4116.94    114.45 o 
   2  -4  10       84.77       90.98     15.11 o 
   3  -4  10     1319.55     1214.08     75.67 o 
   4  -4  10       47.67       44.31      6.55 o 
   5  -4  10      376.74      372.19     20.46 o 
   6  -4  10      320.88      305.58     10.74 o 
   7  -4  10       49.85       30.56     20.97 o 
   8  -4  10      182.31      190.84     13.70 o 
   9  -4  10        0.75       14.52     10.48 o 
  -9  -3  10      228.34      255.66     16.40 o 
  -8  -3  10      170.78      191.08     15.28 o 
  -7  -3  10      781.27      776.73     20.75 o 
  -6  -3  10        9.21       19.79      6.97 o 
  -5  -3  10        5.74       35.76      6.46 o 
  -4  -3  10      264.26      256.86     18.52 o 
  -3  -3  10       83.76       67.66     11.73 o 
  -2  -3  10     1246.38     1381.90     43.77 o 
  -1  -3  10     1127.36     1099.07     28.48 o 
   0  -3  10      304.94      302.37     10.11 o 
   1  -3  10      513.89      510.21     12.94 o 
   2  -3  10      738.05      686.83     18.76 o 
   3  -3  10      250.94      197.91     12.11 o 
   4  -3  10     1846.79     1662.55     97.33 o 
   5  -3  10      350.77      332.28     10.91 o 
   6  -3  10       15.52       16.26      5.82 o 
   7  -3  10      341.20      333.69     10.56 o 
   8  -3  10        0.63        6.83      9.81 o 
   9  -3  10      146.18      150.93     14.36 o 
  -9  -2  10        0.03       26.20     20.26 o 
  -8  -2  10       68.89       73.20     12.32 o 
  -7  -2  10       31.04       76.22     11.57 o 
  -6  -2  10      260.95      249.23     10.24 o 
  -5  -2  10      157.14      150.67      8.23 o 
  -4  -2  10       16.01       17.45      7.56 o 
  -3  -2  10      610.85      662.71     18.15 o 
  -2  -2  10       89.94      100.63     15.38 o 
  -1  -2  10     1110.54     1099.95     29.49 o 
   0  -2  10     3369.07     4077.70     79.94 o 
   1  -2  10      304.49      271.32     25.47 o 
   2  -2  10     1398.11     1238.64     44.37 o 
   3  -2  10     3042.56     3127.12     68.12 o 
   4  -2  10      573.83      543.54     15.66 o 
   5  -2  10        3.64       19.16      5.69 o 
   6  -2  10      848.33      827.16     21.52 o 
   7  -2  10        5.05       10.90     11.77 o 
   8  -2  10      124.69      122.50     31.92 o 
   9  -2  10      108.76      111.89     26.05 o 
  -9  -1  10       26.72       29.88     13.14 o 
  -8  -1  10       41.28       11.38     11.11 o 
  -7  -1  10     1420.73     1469.58     27.75 o 
  -6  -1  10        6.44       -6.71      6.71 o 
  -5  -1  10       21.03       39.99      8.15 o 
  -4  -1  10      130.00      121.56      7.40 o 
  -3  -1  10      282.68      282.88     13.68 o 
  -2  -1  10      642.40      557.92     15.75 o 
  -1  -1  10      179.61      162.66     14.80 o 
   0  -1  10     7392.15     7387.08    108.29 o 
   1  -1  10        1.54        1.62      4.31 o 
   2  -1  10     1620.39     1555.35     51.21 o 
   3  -1  10      333.46      334.78     13.85 o 
   4  -1  10      531.90      456.11     13.84 o 
   5  -1  10      158.71      113.45      8.16 o 
   6  -1  10      168.52      175.21     14.90 o 
   7  -1  10      320.58      285.51     14.25 o 
   8  -1  10        2.23        2.79      9.56 o 
   9  -1  10      474.17      444.76     19.04 o 
  10  -1  10        3.44       15.87     14.12 o 
  -9   0  10        0.84        2.49     13.70 o 
  -8   0  10        2.44       26.24     22.30 o 
  -7   0  10        0.14       67.12     10.15 o 
  -6   0  10      244.33      228.44     10.04 o 
  -5   0  10      150.26      112.66      8.36 o 
  -4   0  10      862.76      916.76     21.99 o 
  -3   0  10     1940.76     1951.78     50.82 o 
  -2   0  10       35.11      106.53      7.13 o 
  -1   0  10     5038.22     3925.00    168.84 o 
   0   0  10       94.53       47.38      4.95 o 
   1   0  10      118.12       64.39      6.02 o 
   2   0  10     1059.13     1219.53     32.85 o 
   3   0  10       19.04       28.53      5.94 o 
   4   0  10       15.66       11.11      9.38 o 
   5   0  10     1154.24     1047.32     39.39 o 
   6   0  10     1069.98      924.02     68.34 o 
   7   0  10      155.57      112.65      9.38 o 
   8   0  10       17.97       14.54      5.74 o 
   9   0  10        0.23       -5.07     10.37 o 
  10   0  10      377.73      408.60     21.28 o 
  -9   1  10       17.80       16.51     14.77 o 
  -8   1  10        3.81       -3.22     10.71 o 
  -7   1  10        6.33        5.01      9.64 o 
  -6   1  10      658.80      602.46     14.01 o 
  -5   1  10      784.36      900.06     30.65 o 
  -4   1  10      554.15      535.98     20.90 o 
  -3   1  10     1697.25     1811.23     85.67 o 
  -2   1  10       39.82      138.31      7.27 o 
  -1   1  10      177.58      156.39      8.19 o 
   0   1  10     2377.46     3198.76     74.10 o 
   1   1  10      519.80      590.56     15.88 o 
   2   1  10     1810.78     1753.17     64.59 o 
   3   1  10        8.95       35.99      5.69 o 
   4   1  10      189.16      151.69     52.38 o 
   5   1  10     1054.79     1016.67     86.21 o 
   6   1  10     1288.71     1381.33     79.87 o 
   7   1  10     1471.01     1461.09     34.33 o 
   8   1  10      162.03      125.01      8.50 o 
   9   1  10      547.87      586.55     20.60 o 
  10   1  10        4.45       21.67     11.84 o 
  -8   2  10      339.39      369.01     56.92 o 
  -7   2  10       45.91       50.72     13.57 o 
  -6   2  10      226.10      181.43      8.95 o 
  -5   2  10       35.91       63.81      7.49 o 
  -4   2  10     1254.57     1292.98     37.57 o 
  -3   2  10     1486.42     1612.95     44.30 o 
  -2   2  10      375.06      351.44     16.91 o 
  -1   2  10     3038.56     2805.25     65.51 o 
   0   2  10     2556.24     3411.76     72.97 o 
   1   2  10      828.82      886.61     24.83 o 
   2   2  10     2896.16     3314.36     73.59 o 
   3   2  10     1667.13     1636.75     50.99 o 
   4   2  10      365.22      391.76     80.99 o 
   5   2  10     1254.47     1222.98     42.39 o 
   6   2  10      410.73      455.55     27.01 o 
   7   2  10      547.64      521.08     33.28 o 
   8   2  10      143.02      150.34      8.97 o 
   9   2  10       53.00       40.58     29.57 o 
  10   2  10       96.14       95.67     13.56 o 
  -8   3  10        1.60       33.80     22.85 o 
  -7   3  10      867.32      859.55     24.35 o 
  -6   3  10      174.76      118.08     17.63 o 
  -5   3  10      461.46      401.50     11.31 o 
  -4   3  10      937.99      991.50     34.38 o 
  -3   3  10      874.88      847.17     25.95 o 
  -2   3  10      892.31     1006.29     26.00 o 
  -1   3  10        2.40        4.36      5.58 o 
   0   3  10      330.07      387.42     12.17 o 
   1   3  10      258.90      250.80     16.37 o 
   2   3  10     3236.46     3314.91     72.94 o 
   3   3  10      381.07      371.47     14.94 o 
   4   3  10        7.40      109.98     39.35 o 
   5   3  10      519.13      545.54     46.99 o 
   6   3  10       68.01       57.03     15.28 o 
   7   3  10      513.03      506.44     15.11 o 
   8   3  10       29.06       29.62      6.45 o 
   9   3  10      640.82      621.85     35.16 o 
  10   3  10      102.84      126.76     15.65 o 
  -8   4  10      322.55      297.62     17.94 o 
  -7   4  10       24.15       43.47     10.86 o 
  -6   4  10      212.44      163.88     13.18 o 
  -5   4  10      118.27      107.74     13.37 o 
  -4   4  10     1073.14     1020.28     29.52 o 
  -3   4  10      132.06       98.34      7.11 o 
  -2   4  10       71.38       60.23      7.28 o 
  -1   4  10     3978.57     3349.04     71.62 o 
   0   4  10      287.50      433.20     11.37 o 
   1   4  10      126.80      139.41      9.24 o 
   2   4  10     1095.59     1490.08     84.10 o 
   3   4  10     3613.17     3946.31     72.96 o 
   4   4  10      278.66      297.52     11.46 o 
   5   4  10      354.99      416.09     11.68 o 
   6   4  10      506.82      473.15     29.02 o 
   7   4  10        5.42       20.38      6.11 o 
   8   4  10      201.41      179.81     11.19 o 
   9   4  10      312.21      282.10     47.37 o 
  10   4  10      135.19      150.05     35.53 o 
  -7   5  10      573.34      560.54     35.47 o 
  -6   5  10       30.81       35.66     11.15 o 
  -5   5  10       56.32       69.18     11.37 o 
  -4   5  10     1391.66     1264.00     30.25 o 
  -3   5  10      527.98      563.63     31.48 o 
  -2   5  10     1497.52     1543.43     40.48 o 
  -1   5  10       18.93       10.35      6.30 o 
   0   5  10     1112.97     1342.50     89.35 o 
   1   5  10        3.50        7.51     12.24 o 
   2   5  10      917.71     1047.76     63.94 o 
   3   5  10      968.14     1018.95     38.26 o 
   4   5  10      368.47      468.17     13.86 o 
   5   5  10     1234.45     1100.59     36.07 o 
   6   5  10       54.31       73.00      9.92 o 
   7   5  10      129.57      111.79     33.15 o 
   8   5  10        0.03       -3.89     11.77 o 
   9   5  10     1187.81     1226.29     40.04 o 
  10   5  10      107.81       87.54     24.45 o 
  -7   6  10      222.17      206.72     17.16 o 
  -6   6  10       12.45       10.04     22.20 o 
  -5   6  10      506.42      482.76     19.19 o 
  -4   6  10        5.79        9.85      4.72 o 
  -3   6  10       20.18       18.76      5.25 o 
  -2   6  10       43.82       63.68      6.17 o 
  -1   6  10     3049.43     2960.21     54.92 o 
   0   6  10       46.89       19.22     10.71 o 
   1   6  10      197.22      256.53      8.66 o 
   2   6  10      281.35      343.52     13.61 o 
   3   6  10     1948.90     1714.26     64.08 o 
   4   6  10        9.45        8.01      6.17 o 
   5   6  10       26.67       22.41      6.24 o 
   6   6  10      669.25      727.31     43.92 o 
   7   6  10      172.74      172.32     20.63 o 
   8   6  10      146.93      145.22     12.45 o 
   9   6  10       38.79       38.85     13.09 o 
  10   6  10      212.05      209.09     32.74 o 
  -6   7  10        0.05      -10.95     10.95 o 
  -5   7  10      263.74      234.54     23.91 o 
  -4   7  10      608.75      621.42     19.00 o 
  -3   7  10       69.28       90.35      6.54 o 
  -2   7  10       43.90       67.80     10.50 o 
  -1   7  10        0.26        2.25      5.56 o 
   0   7  10     1401.83     1275.59     62.34 o 
   1   7  10       40.71       -4.84     18.89 o 
   2   7  10      469.21      470.16     15.28 o 
   3   7  10      677.64      613.70     16.18 o 
   4   7  10        3.80      140.13      8.20 o 
   5   7  10      738.74      767.21     20.19 o 
   6   7  10        4.34       -3.59     11.02 o 
   7   7  10       81.54      140.73      8.18 o 
   8   7  10      138.15      149.02     56.58 o 
   9   7  10      305.56      312.54     17.13 o 
  10   7  10       65.97       85.04     20.39 o 
  -5   8  10      297.23      259.82     16.94 o 
  -4   8  10      128.21      126.95     11.21 o 
  -3   8  10      105.04       82.07     11.49 o 
  -2   8  10       21.10       15.97      5.07 o 
  -1   8  10     1378.63     1171.45     27.08 o 
   0   8  10      207.05      175.07      7.93 o 
   1   8  10       10.44       11.63      4.97 o 
   2   8  10      209.96      191.99      8.05 o 
   3   8  10      238.94      250.48      9.00 o 
   4   8  10      138.61      170.62      8.41 o 
   5   8  10       28.61       19.92      7.91 o 
   6   8  10      788.15      837.22     31.58 o 
   7   8  10        3.60       36.91      9.68 o 
   8   8  10      763.39      785.59     21.75 o 
   9   8  10       55.88       63.06     11.99 o 
  10   8  10       58.27       58.37     13.78 o 
  -5   9  10       66.69       52.74     11.35 o 
  -4   9  10      624.12      633.78     22.56 o 
  -3   9  10        0.06       -7.61      8.71 o 
  -2   9  10      136.74      151.46     12.56 o 
  -1   9  10       15.60       12.48      4.68 o 
   0   9  10      489.31      496.98     11.29 o 
   1   9  10       17.05       -6.75      6.75 o 
   2   9  10      272.22      240.43      9.02 o 
   3   9  10       98.78      136.25      7.66 o 
   4   9  10       69.00       74.09      6.70 o 
   5   9  10      357.67      340.27     10.49 o 
   6   9  10       11.63       39.86     18.01 o 
   7   9  10       53.69       55.33     11.85 o 
   8   9  10        2.39      -10.26     10.92 o 
   9   9  10      314.64      349.84     70.80 o 
  -4  10  10       13.36        0.38     12.86 o 
  -3  10  10       51.14       77.03     24.11 o 
  -2  10  10       77.31       60.84     10.36 o 
  -1  10  10      617.52      644.92     18.45 o 
   0  10  10       10.67        8.52      6.89 o 
   1  10  10        4.05       15.83      6.62 o 
   2  10  10     1003.44     1031.01     22.98 o 
   3  10  10        5.19       -0.09      5.75 o 
   4  10  10      201.25      217.04     12.83 o 
   5  10  10        1.17        4.19      7.78 o 
   6  10  10      435.47      441.94     36.49 o 
   7  10  10        3.70       -7.69     10.19 o 
   8  10  10      197.48      187.23     22.51 o 
   9  10  10        2.91       29.75     12.96 o 
  -2  11  10      149.68      145.07     12.19 o 
  -1  11  10        9.08       16.57     11.02 o 
   0  11  10        0.53        0.72      9.01 o 
   1  11  10      170.50      157.94     13.22 o 
   2  11  10      563.95      505.73     17.55 o 
   3  11  10      160.88      151.99     14.15 o 
   4  11  10       17.18       46.40     20.50 o 
   5  11  10      619.63      559.08     17.95 o 
   6  11  10      102.75      131.12     13.40 o 
   7  11  10       33.37       44.15     12.12 o 
   8  11  10       22.93       33.65     11.67 o 
  -1  12  10      204.06      195.67     22.78 o 
   0  12  10       62.90       48.00     10.62 o 
   1  12  10      193.39      178.45     26.12 o 
   2  12  10      291.96      284.17     15.50 o 
   3  12  10      155.22      104.10     12.35 o 
   4  12  10      159.48      179.28     14.58 o 
   5  12  10       32.19       63.79     12.44 o 
   6  12  10      247.64      266.16     16.37 o 
   7  12  10       79.38      108.80     14.57 o 
   1  13  10      224.48      244.33     17.19 o 
   2  13  10      116.03      107.39     32.60 o 
   3  13  10       35.70       43.65     18.76 o 
   4  13  10        0.32       -8.11     10.30 o 
   5  13  10      219.34      233.86     17.03 o 
  -3 -12  11       15.09       38.67     11.17 o 
  -2 -12  11      240.39      199.28     15.68 o 
  -1 -12  11      420.28      379.42     18.33 o 
   0 -12  11       38.77       31.54     13.20 o 
  -5 -11  11       55.59       51.16     27.49 o 
  -4 -11  11      263.76      299.12     25.82 o 
  -3 -11  11        7.79        7.13      9.87 o 
  -2 -11  11      338.10      344.17     16.40 o 
  -1 -11  11       61.08       61.79     11.32 o 
   0 -11  11      232.81      262.91     14.26 o 
   1 -11  11        2.71       12.96     11.25 o 
   2 -11  11      365.53      416.14     30.73 o 
  -6 -10  11        3.09       -0.86     13.23 o 
  -5 -10  11       67.15       62.24     13.61 o 
  -4 -10  11      104.43      118.04     14.05 o 
  -3 -10  11      357.64      336.90     14.95 o 
  -2 -10  11       63.04       67.63     11.48 o 
  -1 -10  11     1142.28     1124.81     24.16 o 
   0 -10  11        1.83        5.25      7.43 o 
   1 -10  11        2.20       35.18     11.66 o 
   2 -10  11      104.68      104.20     10.44 o 
   3 -10  11       29.70       24.12      9.40 o 
   4 -10  11        8.02       12.45      9.68 o 
  -7  -9  11       29.10       48.44     35.33 o 
  -6  -9  11       14.50       17.02     23.56 o 
  -5  -9  11      326.64      320.82     15.40 o 
  -4  -9  11      460.78      508.71     17.27 o 
  -3  -9  11       71.30       65.94     10.36 o 
  -2  -9  11      731.48      758.96     20.70 o 
  -1  -9  11      169.84      157.89     11.78 o 
   0  -9  11       39.26       37.91     10.71 o 
   1  -9  11        1.18        9.27     11.12 o 
   2  -9  11       81.86       76.86      9.37 o 
   3  -9  11        9.43       15.81      8.93 o 
   4  -9  11      116.89      132.39     13.58 o 
   5  -9  11      281.18      247.62     26.77 o 
  -8  -8  11       87.37       96.94     13.28 o 
  -7  -8  11       15.11        1.13     13.12 o 
  -6  -8  11      190.36      185.03     13.79 o 
  -5  -8  11      353.43      330.02     23.36 o 
  -4  -8  11       66.32       76.93     11.25 o 
  -3  -8  11        3.09        1.56      6.34 o 
  -2  -8  11      177.36      152.56     20.70 o 
  -1  -8  11     1002.59     1076.46     26.12 o 
   0  -8  11       10.64       15.11      5.35 o 
   1  -8  11      342.49      362.08     10.32 o 
   2  -8  11      131.69      117.25      6.93 o 
   3  -8  11       17.09        8.25      7.55 o 
   4  -8  11       30.66       33.99      8.98 o 
   5  -8  11      156.78      164.44     21.89 o 
   6  -8  11      428.48      403.35     29.98 o 
  -8  -7  11       16.25        6.64     12.87 o 
  -7  -7  11       58.78       66.85     15.76 o 
  -6  -7  11       12.31       37.68      9.75 o 
  -5  -7  11      354.38      369.34     14.39 o 
  -4  -7  11      921.99     1173.01     63.29 o 
  -3  -7  11       92.49      116.01      9.51 o 
  -2  -7  11      571.47      567.65     13.43 o 
  -1  -7  11      106.64      131.05      7.54 o 
   0  -7  11        3.07       17.13      5.43 o 
   1  -7  11        5.88       -1.89      4.95 o 
   2  -7  11      528.36      507.12     12.22 o 
   3  -7  11      210.52      161.16     15.45 o 
   4  -7  11        3.86        3.47      7.56 o 
   5  -7  11      424.72      481.84     19.22 o 
   6  -7  11        0.01       -4.96      9.02 o 
   7  -7  11        0.19      -13.32     13.32 o 
  -8  -6  11      375.19      372.91     18.57 o 
  -7  -6  11      129.06      120.96     12.77 o 
  -6  -6  11      170.12      187.10     13.06 o 
  -5  -6  11     2050.09     2061.10     33.49 o 
  -4  -6  11       10.23       22.92      5.77 o 
  -3  -6  11       20.81       29.34      6.58 o 
  -2  -6  11      227.68      398.41     18.11 o 
  -1  -6  11      213.64      172.89      8.00 o 
   0  -6  11       19.36       30.83      5.40 o 
   1  -6  11      569.69      506.48     16.13 o 
   2  -6  11     1351.28     1189.51     70.12 o 
   3  -6  11       12.97       25.83      5.30 o 
   4  -6  11       72.48       88.95      7.03 o 
   5  -6  11        2.48        2.48      8.42 o 
   6  -6  11      520.19      524.01     57.67 o 
   7  -6  11       30.74       25.35     20.39 o 
  -8  -5  11      218.18      193.48     15.41 o 
  -7  -5  11       75.21       94.43     12.53 o 
  -6  -5  11       12.31       -2.03      9.79 o 
  -5  -5  11      396.94      450.56     11.45 o 
  -4  -5  11      469.43      465.42     15.38 o 
  -3  -5  11       64.04       69.48     10.03 o 
  -2  -5  11     1303.72     1233.84     60.81 o 
  -1  -5  11       92.86       92.40      6.87 o 
   0  -5  11      257.09      243.87      9.40 o 
   1  -5  11      307.33      319.87      9.81 o 
   2  -5  11      394.00      431.98     12.31 o 
   3  -5  11      669.23      775.31     18.68 o 
   4  -5  11      215.00      163.77      9.99 o 
   5  -5  11      157.85      188.67      8.25 o 
   6  -5  11       70.95       63.99     10.77 o 
   7  -5  11      132.57      114.09     15.32 o 
   8  -5  11      130.63      148.94     16.09 o 
  -9  -4  11       13.40       23.35     11.57 o 
  -8  -4  11      231.24      269.85     15.94 o 
  -7  -4  11       61.61       80.28     14.60 o 
  -6  -4  11        7.95        3.98      7.16 o 
  -5  -4  11      647.60      618.95     17.60 o 
  -4  -4  11       38.97       48.30      6.70 o 
  -3  -4  11      256.87      340.78     12.52 o 
  -2  -4  11       31.68      145.35      9.92 o 
  -1  -4  11       32.08       31.63      5.42 o 
   0  -4  11     1146.61     1070.76     53.98 o 
   1  -4  11      680.75      686.93     19.64 o 
   2  -4  11     3236.21     3496.29     60.86 o 
   3  -4  11       15.41       19.57      5.87 o 
   4  -4  11      339.42      351.74     10.99 o 
   5  -4  11       92.40       98.45      7.98 o 
   6  -4  11        1.79        7.67      5.19 o 
   7  -4  11        0.02        2.57     13.74 o 
   8  -4  11      313.68      276.95     18.48 o 
  -9  -3  11      332.95      345.87     20.64 o 
  -8  -3  11      210.44      176.40     17.29 o 
  -7  -3  11       59.46       76.50     12.51 o 
  -6  -3  11      258.63      263.92     10.32 o 
  -5  -3  11       25.64       73.67      9.96 o 
  -4  -3  11       16.83       14.26      8.97 o 
  -3  -3  11        1.12       -4.26      4.87 o 
  -2  -3  11     5279.44     4982.11     76.43 o 
  -1  -3  11      355.27      351.52     14.80 o 
   0  -3  11      119.66      165.20      7.57 o 
   1  -3  11      810.04      763.26     27.01 o 
   2  -3  11     1164.01     1256.23     41.20 o 
   3  -3  11      209.64      158.37     11.02 o 
   4  -3  11       15.32       41.48      6.50 o 
   5  -3  11      681.06      675.42     41.16 o 
   6  -3  11        7.69       13.96      6.12 o 
   7  -3  11      319.95      296.63     18.31 o 
   8  -3  11       32.29       10.16     20.67 o 
   9  -3  11       84.45      109.43     14.59 o 
  -9  -2  11       65.16       64.80     14.30 o 
  -8  -2  11      470.94      456.22     19.47 o 
  -7  -2  11       45.05       40.69     10.76 o 
  -6  -2  11       94.40      129.14      7.88 o 
  -5  -2  11      557.60      628.26     15.03 o 
  -4  -2  11       14.45       15.39      6.27 o 
  -3  -2  11      476.57      506.67     14.78 o 
  -2  -2  11       55.01      150.55     11.15 o 
  -1  -2  11     3218.49     3276.12     68.99 o 
   0  -2  11      444.40      491.16     24.32 o 
   1  -2  11     1881.35     1761.09    128.81 o 
   2  -2  11     1160.98     1187.93     29.05 o 
   3  -2  11       15.60       48.18      8.66 o 
   4  -2  11     2592.41     2440.98     52.19 o 
   5  -2  11      219.95      239.14     10.78 o 
   6  -2  11       46.61       36.99      9.51 o 
   7  -2  11      562.57      490.40     13.35 o 
   8  -2  11      565.26      566.74     19.53 o 
   9  -2  11       80.89       70.75     12.68 o 
  -9  -1  11       50.40       56.95     13.76 o 
  -8  -1  11       63.41       24.53     24.04 o 
  -7  -1  11       61.10      142.09     12.85 o 
  -6  -1  11     1268.52     1321.14     27.13 o 
  -5  -1  11      577.77      635.26     14.79 o 
  -4  -1  11      798.88      943.53     25.61 o 
  -3  -1  11       45.40       75.65      7.29 o 
  -2  -1  11     1613.04     1732.64     93.10 o 
  -1  -1  11     1962.99     2100.48     56.57 o 
   0  -1  11       57.87      270.99     31.31 o 
   1  -1  11     3269.36     2888.69     64.11 o 
   2  -1  11      850.92      856.98     21.49 o 
   3  -1  11      476.79      423.56     20.60 o 
   4  -1  11        2.96        8.05      5.52 o 
   5  -1  11     1249.15     1450.15     39.10 o 
   6  -1  11       62.77       52.86     19.81 o 
   7  -1  11      216.29      221.05     10.48 o 
   8  -1  11      192.78      180.26     14.06 o 
   9  -1  11      291.79      326.58     43.11 o 
  10  -1  11       11.97       10.21     13.64 o 
  -8   0  11       27.10       41.26     12.12 o 
  -7   0  11       16.43       12.06     14.63 o 
  -6   0  11        1.95        8.85      6.41 o 
  -5   0  11      750.54     1028.20     28.48 o 
  -4   0  11       35.40       67.15      6.68 o 
  -3   0  11      573.02      653.43     16.51 o 
  -2   0  11      803.34      852.20     22.79 o 
  -1   0  11     1425.91     1268.51     40.99 o 
   0   0  11      327.09      324.21      9.86 o 
   1   0  11     1730.73     1520.57     71.96 o 
   2   0  11      604.67      543.91     15.08 o 
   3   0  11      134.65       73.59     13.44 o 
   4   0  11     2579.82     2440.40    104.90 o 
   5   0  11       98.96      100.77     14.94 o 
   6   0  11      801.89      710.97     37.68 o 
   7   0  11       67.21       77.20     10.50 o 
   8   0  11      178.07      179.93     13.19 o 
   9   0  11      121.45      121.40     14.55 o 
  10   0  11       39.57       46.29     13.88 o 
  -8   1  11        5.52       -0.60      8.58 o 
  -7   1  11       25.32       38.50     10.85 o 
  -6   1  11      461.41      426.03     11.31 o 
  -5   1  11        4.90        4.06      6.94 o 
  -4   1  11      201.94      167.27      8.86 o 
  -3   1  11       83.51      491.55     32.53 o 
  -2   1  11     2445.94     2319.57     55.59 o 
  -1   1  11      138.02      231.94     21.48 o 
   0   1  11     1829.51     1992.60     56.34 o 
   1   1  11     8415.58     7229.03    163.69 o 
   2   1  11       54.85      112.90     19.27 o 
   3   1  11      339.57      295.01     10.21 o 
   4   1  11        8.87       28.33      5.61 o 
   5   1  11      794.39      701.87     38.60 o 
   6   1  11      481.42      506.67     30.52 o 
   7   1  11      454.42      458.63     16.68 o 
   8   1  11       14.01       26.07      8.99 o 
   9   1  11        4.31       17.24     12.39 o 
  10   1  11       37.84       49.03     14.54 o 
  -8   2  11       89.68      122.68     14.46 o 
  -7   2  11       46.44       42.79     10.55 o 
  -6   2  11      126.26      123.59     11.81 o 
  -5   2  11      674.28      679.24     19.92 o 
  -4   2  11      333.83      325.78     10.97 o 
  -3   2  11     3747.62     3655.52     60.84 o 
  -2   2  11       85.84      111.91      8.93 o 
  -1   2  11      317.73      243.25      9.23 o 
   0   2  11      617.05      704.23     18.95 o 
   1   2  11     3077.58     3146.84     66.60 o 
   2   2  11      160.94      213.76      8.03 o 
   3   2  11        3.85       25.42     16.03 o 
   4   2  11     1750.08     1718.13     55.59 o 
   5   2  11        0.70       40.70      8.36 o 
   6   2  11      800.75      804.68     53.98 o 
   7   2  11      464.39      576.44     17.97 o 
   8   2  11      740.82      726.24     50.40 o 
   9   2  11       98.78       98.09     12.67 o 
  10   2  11        4.55       27.59     11.66 o 
  -8   3  11       39.37       20.61     13.77 o 
  -7   3  11      145.50      150.33     17.43 o 
  -6   3  11      488.73      451.31     17.75 o 
  -5   3  11       91.13      121.46      8.13 o 
  -4   3  11        0.36       -3.34      5.31 o 
  -3   3  11      286.70      739.83     65.07 o 
  -2   3  11     3381.58     3428.00     83.24 o 
  -1   3  11       42.62       57.27      6.33 o 
   0   3  11        3.58       41.99      4.89 o 
   1   3  11     2388.21     2202.15     55.25 o 
   2   3  11      345.88      532.71     14.85 o 
   3   3  11      209.69      208.76     13.40 o 
   4   3  11      165.01      200.94      9.41 o 
   5   3  11     1741.67     2028.28     47.07 o 
   6   3  11       16.56        6.70      8.22 o 
   7   3  11      134.70      173.87      9.21 o 
   8   3  11      201.26      251.69     18.89 o 
   9   3  11       10.56       22.21     15.11 o 
  10   3  11      115.34      115.92     25.13 o 
  -7   4  11       61.53       65.33     12.21 o 
  -6   4  11      179.39      174.79     13.76 o 
  -5   4  11     1379.82     1507.85     27.32 o 
  -4   4  11      151.51      128.01     15.55 o 
  -3   4  11     1660.62     1618.04     37.00 o 
  -2   4  11      330.63      334.91     10.53 o 
  -1   4  11        1.47       33.04     19.81 o 
   0   4  11      946.59     1064.73     29.25 o 
   1   4  11       11.71       10.36      4.74 o 
   2   4  11     1378.93     1365.27     42.80 o 
   3   4  11       23.05       35.10      5.57 o 
   4   4  11     1802.45     2095.43     47.85 o 
   5   4  11      973.53      986.25     33.13 o 
   6   4  11       45.50       51.02      7.13 o 
   7   4  11      189.15      281.14     21.08 o 
   8   4  11      140.61      112.58     12.93 o 
   9   4  11        0.99       21.19     11.09 o 
  10   4  11        0.50        7.57     10.38 o 
  -7   5  11       51.01       15.65     20.09 o 
  -6   5  11      303.58      303.46     17.56 o 
  -5   5  11        1.80       10.87     12.69 o 
  -4   5  11        2.40        2.50      5.97 o 
  -3   5  11       79.25      329.55     19.10 o 
  -2   5  11      226.95      233.43      8.99 o 
  -1   5  11       58.12       41.12      6.10 o 
   0   5  11      902.12      883.50     28.58 o 
   1   5  11     1955.58     1850.50     61.66 o 
   2   5  11        7.81       23.30      5.06 o 
   3   5  11       31.90       41.63      5.58 o 
   4   5  11        1.28       22.04      8.53 o 
   5   5  11      861.98      903.06     27.38 o 
   6   5  11       48.29      115.77     48.90 o 
   7   5  11      129.35      122.82      7.91 o 
   8   5  11       68.74      127.98     15.52 o 
   9   5  11        1.75       41.15     13.85 o 
  10   5  11      363.86      347.15     53.30 o 
  -6   6  11       57.77       75.83     12.53 o 
  -5   6  11        5.11        4.73     10.76 o 
  -4   6  11      199.26      168.38     17.87 o 
  -3   6  11      507.75      505.64     12.10 o 
  -2   6  11       99.16       99.67      7.47 o 
  -1   6  11      109.97      117.36      7.76 o 
   0   6  11      542.97      580.61     14.55 o 
   1   6  11      126.43       90.14      9.24 o 
   2   6  11     1517.71     1526.42     56.99 o 
   3   6  11        8.53       13.91      5.79 o 
   4   6  11     1253.69     1294.68     61.56 o 
   5   6  11      104.58      160.28     40.85 o 
   6   6  11      222.19      254.39     16.40 o 
   7   6  11      572.43      561.80     41.30 o 
   8   6  11      161.42      144.09     12.52 o 
   9   6  11       67.84       53.20     12.11 o 
  10   6  11        0.17        0.41     10.89 o 
  -6   7  11      530.35      487.78     21.54 o 
  -5   7  11       52.55       26.94     15.69 o 
  -4   7  11      401.61      337.77     22.81 o 
  -3   7  11      190.39      207.47     25.78 o 
  -2   7  11      649.98      630.84     19.78 o 
  -1   7  11        3.64       -0.83      4.96 o 
   0   7  11      122.38      148.79      7.45 o 
   1   7  11     1257.42     1377.65     35.78 o 
   2   7  11       72.67       64.16     10.26 o 
   3   7  11     1003.53      931.43     23.51 o 
   4   7  11        7.47       67.84      7.06 o 
   5   7  11       82.18       66.48     11.70 o 
   6   7  11     1350.98     1372.25     29.08 o 
   7   7  11      653.37      576.80     27.08 o 
   8   7  11      143.47      136.25     22.78 o 
   9   7  11       27.89       41.73     17.19 o 
  10   7  11       73.25       67.41     12.99 o 
  -5   8  11      123.52      151.72     15.90 o 
  -4   8  11      102.12       69.10     12.10 o 
  -3   8  11      101.10      123.71     11.33 o 
  -2   8  11      134.57      138.26     11.02 o 
  -1   8  11       18.70       45.47      5.99 o 
   0   8  11      177.40      161.63     15.72 o 
   1   8  11      219.28      200.96      9.55 o 
   2   8  11      659.20      748.52     39.52 o 
   3   8  11       14.63       10.63      5.25 o 
   4   8  11     1920.27     2164.99     52.35 o 
   5   8  11      104.19       82.98      6.92 o 
   6   8  11       26.67       40.40      6.89 o 
   7   8  11      967.93      949.74     24.86 o 
   8   8  11       55.63       47.37     12.53 o 
   9   8  11       16.41       29.93     35.16 o 
  -4   9  11       26.00       18.55     11.81 o 
  -3   9  11       31.42       55.63     11.67 o 
  -2   9  11        8.66        3.36      8.24 o 
  -1   9  11       49.00       35.27      7.78 o 
   0   9  11      222.28      272.82     12.87 o 
   1   9  11     1867.84     1674.38     28.84 o 
   2   9  11      202.67      203.14     11.08 o 
   3   9  11     1914.23     1844.78     30.19 o 
   4   9  11      351.11      386.79     13.68 o 
   5   9  11      309.51      315.26     15.04 o 
   6   9  11      251.51      244.92     15.38 o 
   7   9  11      227.43      237.77     42.94 o 
   8   9  11      274.70      261.90     35.30 o 
   9   9  11       48.26       42.03     16.85 o 
  -3  10  11      175.54      159.98     14.40 o 
  -2  10  11      143.03      167.68     20.60 o 
  -1  10  11      245.93      230.58     32.36 o 
   0  10  11      833.10      751.27     31.44 o 
   1  10  11       55.50       44.07      9.69 o 
   2  10  11       29.52        8.54     12.14 o 
   3  10  11       82.08       85.46     17.19 o 
   4  10  11      446.37      559.87     17.31 o 
   5  10  11        1.35       19.14      8.04 o 
   6  10  11      206.37      223.89     13.57 o 
   7  10  11      141.78      157.57     13.51 o 
   8  10  11      148.81      166.42     29.46 o 
  -2  11  11      108.24       78.85     11.86 o 
  -1  11  11       62.00       76.56     11.48 o 
   0  11  11      202.58      228.11     13.60 o 
   1  11  11      256.04      251.89     22.17 o 
   2  11  11       50.40       27.03      9.09 o 
   3  11  11      650.42      592.00     31.78 o 
   4  11  11      162.57      168.07     12.93 o 
   5  11  11        6.77       15.39      9.44 o 
   6  11  11      264.53      295.87     16.06 o 
   7  11  11      329.32      355.27     38.26 o 
   0  12  11      477.67      406.69     18.22 o 
   1  12  11       45.70       36.27     11.31 o 
   2  12  11       29.43       36.83     22.54 o 
   3  12  11       44.26       34.22      9.45 o 
   4  12  11      499.23      539.96     23.12 o 
   5  12  11        6.70       17.28      9.19 o 
   6  12  11      115.04      134.05     13.33 o 
  -4 -11  12        5.70       20.15     22.37 o 
  -3 -11  12      115.68      105.14     12.78 o 
  -2 -11  12      194.26      181.86     13.35 o 
  -1 -11  12        4.05       -7.56      9.53 o 
   0 -11  12      249.14      219.25     14.97 o 
   1 -11  12      460.45      553.49     21.07 o 
  -5 -10  12       11.62       19.26     10.21 o 
  -4 -10  12        1.46       19.77      9.69 o 
  -3 -10  12      317.11      315.40     15.86 o 
  -2 -10  12      177.95      196.68     14.12 o 
  -1 -10  12      104.06       81.70     18.31 o 
   0 -10  12      268.47      232.64     46.65 o 
   1 -10  12      117.70      141.62     12.97 o 
   2 -10  12        0.86       -6.50      9.21 o 
   3 -10  12        1.56       -4.89      8.69 o 
  -6  -9  12      211.89      226.71     26.33 o 
  -5  -9  12       14.60       13.96     11.84 o 
  -4  -9  12      163.90      183.99     22.23 o 
  -3  -9  12       40.47       35.61      8.81 o 
  -2  -9  12       76.45       91.64     10.49 o 
  -1  -9  12      146.96      138.84     10.94 o 
   0  -9  12      158.23      142.34     11.56 o 
   1  -9  12      405.23      440.12     62.10 o 
   2  -9  12      140.50      112.87     18.96 o 
   3  -9  12      183.66      200.31     13.93 o 
   4  -9  12      201.87      188.95     20.60 o 
  -7  -8  12      211.71      234.21     17.94 o 
  -6  -8  12        1.48       -1.02     16.34 o 
  -5  -8  12        1.03        2.97     11.40 o 
  -4  -8  12       23.22       13.82      9.51 o 
  -3  -8  12      876.28      845.68     19.95 o 
  -2  -8  12       55.26       79.86     10.10 o 
  -1  -8  12      309.39      264.32      9.12 o 
   0  -8  12     2058.34     1990.23     55.66 o 
   1  -8  12       79.86       68.55      9.93 o 
   2  -8  12       37.90       43.86      8.25 o 
   3  -8  12       46.78       54.04      9.83 o 
   4  -8  12      425.34      374.32     18.62 o 
   5  -8  12      119.25      125.49     14.61 o 
  -7  -7  12       37.66       38.34     14.49 o 
  -6  -7  12      332.68      300.98     15.84 o 
  -5  -7  12        0.15       -9.26      9.26 o 
  -4  -7  12      838.20      831.67     67.42 o 
  -3  -7  12      767.20      716.98     20.87 o 
  -2  -7  12      683.78      717.24     50.20 o 
  -1  -7  12      122.76      167.75     16.78 o 
   0  -7  12      159.39      155.80      7.57 o 
   1  -7  12      639.22      653.01     27.15 o 
   2  -7  12        1.36        0.97      5.47 o 
   3  -7  12      260.15      261.61     13.56 o 
   4  -7  12      272.18      232.68     21.35 o 
   5  -7  12       21.00        1.26     42.63 o 
   6  -7  12      187.00      244.52     16.50 o 
  -8  -6  12       14.46        3.23     13.35 o 
  -7  -6  12      316.11      328.31     24.83 o 
  -6  -6  12        1.73        4.58      9.08 o 
  -5  -6  12       80.26       55.67     11.49 o 
  -4  -6  12      128.73      150.94      7.91 o 
  -3  -6  12     2168.75     2091.04     34.91 o 
  -2  -6  12       82.40      146.69      8.14 o 
  -1  -6  12      892.35      712.21     33.42 o 
   0  -6  12      823.72      720.33     16.28 o 
   1  -6  12        4.71       -1.11      6.00 o 
   2  -6  12       37.52       21.06      7.71 o 
   3  -6  12        8.64       57.45      6.05 o 
   4  -6  12       23.88       48.33      9.05 o 
   5  -6  12       93.91       91.28     26.46 o 
   6  -6  12      181.22      235.67     36.56 o 
   7  -6  12      578.18      485.07     23.04 o 
  -8  -5  12       23.64        7.99     12.52 o 
  -7  -5  12        5.80       59.22     12.79 o 
  -6  -5  12      895.79      892.41     28.82 o 
  -5  -5  12      129.34      120.94     14.77 o 
  -4  -5  12      193.66      182.44     14.49 o 
  -3  -5  12      642.30      610.14     14.39 o 
  -2  -5  12       10.31       73.87      6.72 o 
  -1  -5  12      256.26      267.56     15.89 o 
   0  -5  12      128.26      110.40     21.35 o 
   1  -5  12      140.41      111.27      8.59 o 
   2  -5  12      338.32      353.77     20.67 o 
   3  -5  12     2537.41     2413.08     44.40 o 
   4  -5  12      748.64      748.84     22.64 o 
   5  -5  12       69.44       67.12     10.86 o 
   6  -5  12      118.35      123.96     11.95 o 
   7  -5  12      183.40      176.81     16.95 o 
   8  -5  12        2.85       14.50     11.41 o 
  -8  -4  12      237.78      247.92     16.48 o 
  -7  -4  12      554.60      582.80     20.75 o 
  -6  -4  12       81.73       79.10     17.53 o 
  -5  -4  12      257.43      290.59     10.71 o 
  -4  -4  12      191.85      208.90      8.48 o 
  -3  -4  12      425.91      518.23     13.09 o 
  -2  -4  12        1.33       24.60     10.61 o 
  -1  -4  12      351.78      327.26     10.75 o 
   0  -4  12      310.91      266.74      9.29 o 
   1  -4  12       69.68       79.54      6.68 o 
   2  -4  12     1204.91     1012.48     38.09 o 
   3  -4  12      227.72      350.12     11.86 o 
   4  -4  12     1236.37     1192.32     46.18 o 
   5  -4  12        0.25       -5.62      5.62 o 
   6  -4  12      247.23      265.03     15.61 o 
   7  -4  12      284.42      284.01     19.47 o 
   8  -4  12        0.61       -7.86     10.33 o 
  -8  -3  12      312.11      306.10     22.85 o 
  -7  -3  12       15.48       48.14     16.16 o 
  -6  -3  12      172.40      195.88     14.70 o 
  -5  -3  12        0.19       60.55     25.00 o 
  -4  -3  12       64.06       74.62      6.92 o 
  -3  -3  12       15.66       15.65     10.74 o 
  -2  -3  12       44.84      284.82     43.89 o 
  -1  -3  12     1814.78     1656.90     43.13 o 
   0  -3  12      420.44      385.01     11.41 o 
   1  -3  12      650.59      615.08     19.71 o 
   2  -3  12      343.59      293.07     12.96 o 
   3  -3  12     4346.67     4261.35     75.88 o 
   4  -3  12        1.25       -2.62      6.01 o 
   5  -3  12        0.56       31.83      6.44 o 
   6  -3  12      827.57      788.42     20.59 o 
   7  -3  12      315.65      274.09     19.92 o 
   8  -3  12       26.95       59.39     13.39 o 
  -8  -2  12       55.29       52.71     13.56 o 
  -7  -2  12     1020.86     1014.67     37.34 o 
  -6  -2  12        3.32        5.57      8.80 o 
  -5  -2  12       88.53      102.55      7.76 o 
  -4  -2  12      225.27      217.56      9.41 o 
  -3  -2  12      859.39     1066.99     32.93 o 
  -2  -2  12      157.73      194.09      8.53 o 
  -1  -2  12      351.59      398.99     14.77 o 
   0  -2  12     4212.02     4400.43     72.15 o 
   1  -2  12      162.94      116.19      6.99 o 
   2  -2  12      479.94      494.29     12.65 o 
   3  -2  12      214.42      231.35     19.71 o 
   4  -2  12      467.76      467.32     13.07 o 
   5  -2  12      311.01      280.17     15.62 o 
   6  -2  12      180.02      175.73     10.33 o 
   7  -2  12      229.14      190.63     37.89 o 
   8  -2  12       10.83      -10.96     11.55 o 
   9  -2  12      156.67      177.56     16.19 o 
  -8  -1  12        3.39        7.72     11.77 o 
  -7  -1  12       12.29       89.91     11.11 o 
  -6  -1  12      212.99      176.17     12.47 o 
  -5  -1  12       30.08       57.63      9.75 o 
  -4  -1  12      805.18      765.20     34.78 o 
  -3  -1  12       59.12       74.05      6.77 o 
  -2  -1  12      484.82      547.46     17.73 o 
  -1  -1  12     1975.76     1933.77     49.96 o 
   0  -1  12      993.90     1113.35     65.68 o 
   1  -1  12      155.18      133.80     10.95 o 
   2  -1  12      391.74      302.49     19.44 o 
   3  -1  12     3830.03     3695.82    128.91 o 
   4  -1  12       23.49       19.63      6.23 o 
   5  -1  12       86.28      201.15      8.87 o 
   6  -1  12     2136.33     2024.05     36.35 o 
   7  -1  12       94.99       65.93     11.86 o 
   8  -1  12       11.71       27.07     25.44 o 
   9  -1  12       20.28       40.50     21.31 o 
  -8   0  12        1.43       -5.91     10.20 o 
  -7   0  12      164.89      165.69     14.52 o 
  -6   0  12        2.63        0.85     10.23 o 
  -5   0  12      118.07      122.63      8.25 o 
  -4   0  12       70.81       98.35      7.13 o 
  -3   0  12      352.03      437.60     11.12 o 
  -2   0  12        9.37       15.89      5.79 o 
  -1   0  12      740.33      732.57     61.56 o 
   0   0  12     2741.59     3161.80     63.54 o 
   1   0  12      785.01      728.33     31.61 o 
   2   0  12     1548.50     1445.59     44.44 o 
   3   0  12      296.80      296.46     19.00 o 
   4   0  12       18.43       20.43     40.31 o 
   5   0  12       24.89       26.14      8.29 o 
   6   0  12      231.84      281.45     11.33 o 
   7   0  12       56.02       87.34     18.45 o 
   8   0  12      488.08      374.64     18.49 o 
   9   0  12      266.01      277.25     16.15 o 
  -8   1  12      213.45      252.13     27.79 o 
  -7   1  12       10.84       56.91     12.06 o 
  -6   1  12      124.90      157.16     14.10 o 
  -5   1  12       77.13       93.28      7.32 o 
  -4   1  12     1051.66      930.87     30.24 o 
  -3   1  12      583.87      581.79     13.99 o 
  -2   1  12      522.08      602.98     53.03 o 
  -1   1  12     1753.42     1835.42     71.96 o 
   0   1  12      881.33     1072.53     25.63 o 
   1   1  12      103.19      106.70      9.31 o 
   2   1  12      625.14      794.69     31.99 o 
   3   1  12      156.60      173.21     15.31 o 
   4   1  12       12.25       18.10      5.61 o 
   5   1  12       78.18      124.59      7.71 o 
   6   1  12      995.33      900.97     28.61 o 
   7   1  12       73.05       54.71      7.28 o 
   8   1  12      122.91      150.64     16.64 o 
   9   1  12        8.06       -6.72     14.32 o 
  10   1  12      282.90      306.62     22.41 o 
  -7   2  12       90.37       99.58     14.83 o 
  -6   2  12       17.59      -10.88     10.88 o 
  -5   2  12      942.74      868.96     21.73 o 
  -4   2  12      877.08      736.69     35.67 o 
  -3   2  12      996.39     1032.58     32.79 o 
  -2   2  12      781.80      822.93     20.95 o 
  -1   2  12       68.01       38.35      6.50 o 
   0   2  12     3727.07     3691.14     65.76 o 
   1   2  12      285.44      245.31      8.83 o 
   2   2  12     1187.78     1207.67     49.24 o 
   3   2  12      158.65      132.66      8.13 o 
   4   2  12      138.13      172.01      8.25 o 
   5   2  12      386.83      287.89     10.37 o 
   6   2  12      938.30      917.66     52.31 o 
   7   2  12      470.03      417.88     11.86 o 
   8   2  12        0.00      -10.13     10.13 o 
   9   2  12      778.96      785.95     39.90 o 
  10   2  12       23.45       48.95     10.72 o 
  -7   3  12       10.57       26.93     11.57 o 
  -6   3  12        2.60       -1.23      9.95 o 
  -5   3  12      282.46      246.00     14.36 o 
  -4   3  12     2423.11     2448.58     84.27 o 
  -3   3  12      574.91      514.86     12.19 o 
  -2   3  12      321.02      324.16     14.63 o 
  -1   3  12     2077.20     1945.00     46.39 o 
   0   3  12      387.50      400.14     10.75 o 
   1   3  12      413.97      450.90     12.24 o 
   2   3  12      601.45     1144.26     53.78 o 
   3   3  12      319.27      319.76     10.25 o 
   4   3  12      232.33      286.84     10.08 o 
   5   3  12      125.77      118.23     10.81 o 
   6   3  12     1893.46     1879.38    143.06 o 
   7   3  12       11.37       -4.75      6.03 o 
   8   3  12      110.35      123.58     12.52 o 
   9   3  12      101.52       97.90     13.45 o 
  10   3  12       33.33       61.47     23.02 o 
  -7   4  12      334.79      336.91     19.50 o 
  -6   4  12       60.20       41.25     10.48 o 
  -5   4  12       36.01       93.39     11.20 o 
  -4   4  12      912.70      736.59     21.03 o 
  -3   4  12       95.49       76.54      7.64 o 
  -2   4  12      147.00      103.89      7.31 o 
  -1   4  12      312.10      235.11      9.51 o 
   0   4  12       16.94       46.39      5.59 o 
   1   4  12        7.50        5.98      4.82 o 
   2   4  12      977.97      983.22     23.33 o 
   3   4  12      507.14      517.54     27.18 o 
   4   4  12        0.90      144.81     18.11 o 
   5   4  12      690.39      696.29     26.46 o 
   6   4  12      133.83      170.56     20.70 o 
   7   4  12      169.82      133.32     12.38 o 
   8   4  12       60.49       39.19     10.01 o 
   9   4  12      583.71      654.18     71.72 o 
  10   4  12        9.08       25.21     11.86 o 
  -6   5  12        0.55       -2.64     11.66 o 
  -5   5  12      261.32      213.93     18.59 o 
  -4   5  12       19.16       13.83      8.36 o 
  -3   5  12      707.87      706.33     29.23 o 
  -2   5  12        3.31        5.93     10.67 o 
  -1   5  12       61.41       69.23      7.95 o 
   0   5  12      417.86      415.17     11.92 o 
   1   5  12     1430.79     1322.65     36.60 o 
   2   5  12       53.91      208.95      8.46 o 
   3   5  12     1332.96     1283.17     36.80 o 
   4   5  12       86.52       77.52      6.97 o 
   5   5  12      737.15      733.44     20.27 o 
   6   5  12     1595.82     1650.29     52.04 o 
   7   5  12       33.48       21.64     15.28 o 
   8   5  12      228.19      235.16     15.21 o 
   9   5  12      148.05      191.79     30.52 o 
  10   5  12       36.15       49.10     13.40 o 
  -6   6  12       16.06        8.91     11.44 o 
  -5   6  12       94.06      122.63     19.23 o 
  -4   6  12      115.54       94.63     13.50 o 
  -3   6  12        7.56       15.89      9.89 o 
  -2   6  12      742.41      656.36     48.56 o 
  -1   6  12       37.64       37.37      5.74 o 
   0   6  12      568.69      584.88     15.04 o 
   1   6  12      431.61      435.99     11.07 o 
   2   6  12     1794.30     1689.46     37.38 o 
   3   6  12      680.96      684.85     16.22 o 
   4   6  12       16.99      151.45      8.36 o 
   5   6  12     1037.36      973.71     28.22 o 
   6   6  12      585.98      574.78     15.65 o 
   7   6  12      112.58      134.77     17.49 o 
   8   6  12      162.47      124.89     14.77 o 
   9   6  12      306.22      341.58     25.10 o 
  10   6  12       80.00       85.99     46.31 o 
  -5   7  12      323.24      297.84     31.03 o 
  -4   7  12        7.03       13.11     11.80 o 
  -3   7  12       19.76       17.23     19.23 o 
  -2   7  12       33.94       47.37      9.16 o 
  -1   7  12     1175.48     1134.59     28.58 o 
   0   7  12       48.13       37.67      5.66 o 
   1   7  12      114.32       72.82     10.78 o 
   2   7  12      106.26      201.47      8.15 o 
   3   7  12      750.69      722.31     17.91 o 
   4   7  12       73.56       93.75      7.47 o 
   5   7  12        9.91        8.95      5.52 o 
   6   7  12      562.66      624.62     15.22 o 
   7   7  12       31.04       79.99     12.66 o 
   8   7  12      417.39      418.51     33.69 o 
   9   7  12       16.76       32.09     11.38 o 
  -4   8  12      210.71      189.88     13.95 o 
  -3   8  12       48.47       29.07     10.14 o 
  -2   8  12      321.02      280.03     15.21 o 
  -1   8  12        2.39       14.05     13.13 o 
   0   8  12     2136.65     2070.31     31.35 o 
   1   8  12       65.01       35.48     11.15 o 
   2   8  12      983.60     1028.94     45.19 o 
   3   8  12      276.19      285.79      9.58 o 
   4   8  12      201.22      364.79     10.56 o 
   5   8  12      770.74      758.89     19.84 o 
   6   8  12       37.78       23.03     10.74 o 
   7   8  12        9.72       20.42     10.68 o 
   8   8  12       56.57       59.51     16.13 o 
   9   8  12      130.18      173.25     20.12 o 
  -3   9  12       19.62       25.61     11.29 o 
  -2   9  12      165.44      159.52     11.74 o 
  -1   9  12      490.10      510.70     19.78 o 
   0   9  12       23.61       11.72      8.63 o 
   1   9  12      127.62      115.21     12.84 o 
   2   9  12      368.55      351.42     14.37 o 
   3   9  12       49.28       23.73     14.49 o 
   4   9  12      308.44      385.74     21.01 o 
   5   9  12       64.40       95.68     10.76 o 
   6   9  12      305.59      363.68     15.77 o 
   7   9  12       17.77       25.20     11.57 o 
   8   9  12      260.68      261.47     16.85 o 
  -2  10  12      256.16      260.63     15.34 o 
  -1  10  12        0.46        0.66     11.20 o 
   0  10  12       44.77       41.39      9.55 o 
   1  10  12       56.37       84.06     12.67 o 
   2  10  12      449.06      489.69     18.59 o 
   3  10  12       32.95       16.43     12.12 o 
   4  10  12        2.05       -4.33     10.97 o 
   5  10  12      326.90      345.55     15.79 o 
   6  10  12       40.24       28.01     11.58 o 
   7  10  12       10.38       23.27     12.81 o 
   8  10  12        6.79       10.82     10.01 o 
  -1  11  12      642.84      673.97     21.29 o 
   0  11  12       22.58       18.50     10.16 o 
   1  11  12      149.15      139.23     11.91 o 
   2  11  12      204.68      177.42     43.62 o 
   3  11  12       57.94       35.54     12.11 o 
   4  11  12      207.83      222.01     14.78 o 
   5  11  12       36.67       48.58     13.98 o 
   6  11  12      151.38      163.92     14.25 o 
   7  11  12       43.00       23.56     12.86 o 
   1  12  12      314.04      350.76     18.35 o 
   2  12  12      140.25      132.71     27.35 o 
   3  12  12       22.83       23.46      9.84 o 
   4  12  12        5.88        5.55      8.98 o 
   5  12  12      256.88      250.51     15.95 o 
  -2 -11  13       38.74       26.24     10.98 o 
  -1 -11  13      513.97      459.18     34.03 o 
   0 -11  13       17.69       12.36     11.14 o 
  -4 -10  13       50.89       83.56     19.51 o 
  -3 -10  13       21.32       23.68     12.16 o 
  -2 -10  13      267.48      269.84     16.23 o 
  -1 -10  13       11.24       -6.23      9.14 o 
   0 -10  13      134.87      123.32     21.89 o 
   1 -10  13        3.07       24.63      8.97 o 
   2 -10  13      214.79      205.31     45.12 o 
  -6  -9  13       17.99       10.95     12.83 o 
  -5  -9  13      231.91      237.58     15.98 o 
  -4  -9  13       14.65       25.52     11.83 o 
  -3  -9  13        3.99        3.88     10.89 o 
  -2  -9  13       73.05       77.85     24.89 o 
  -1  -9  13      537.24      494.94     19.81 o 
   0  -9  13       45.79       35.53      9.33 o 
   1  -9  13       63.56       62.42     10.22 o 
   2  -9  13       51.45       41.28      8.79 o 
   3  -9  13       20.88       45.37     40.10 o 
   4  -9  13        7.97        7.47     11.72 o 
  -6  -8  13       13.10       22.45     12.09 o 
  -5  -8  13       99.58      131.74     13.70 o 
  -4  -8  13      359.54      411.32     22.75 o 
  -3  -8  13       46.53       51.15     10.37 o 
  -2  -8  13      137.45      140.85     12.65 o 
  -1  -8  13       82.07       66.35     11.24 o 
   0  -8  13       36.95       29.52     13.61 o 
   1  -8  13        1.00       19.26     10.35 o 
   2  -8  13      108.75       82.96     10.44 o 
   3  -8  13       31.55       23.13     10.09 o 
   4  -8  13       38.64       27.89     11.04 o 
   5  -8  13      382.98      381.75     18.96 o 
  -7  -7  13       34.43       35.69     19.30 o 
  -6  -7  13      270.57      276.54     15.98 o 
  -5  -7  13      321.02      314.13     16.47 o 
  -4  -7  13        0.63        5.80      9.72 o 
  -3  -7  13       53.61       66.27     10.44 o 
  -2  -7  13        3.53      119.76     32.67 o 
  -1  -7  13     1854.13     1911.10     57.97 o 
   0  -7  13       81.32       85.39      6.36 o 
   1  -7  13      335.89      299.70      9.26 o 
   2  -7  13      237.06      233.60     12.92 o 
   3  -7  13        0.22       -0.68      9.99 o 
   4  -7  13       38.61       14.11     10.90 o 
   5  -7  13      100.74       97.83     11.99 o 
   6  -7  13      313.08      283.59     17.70 o 
  -7  -6  13       34.59       27.75     11.54 o 
  -6  -6  13       16.63        8.55      9.16 o 
  -5  -6  13      201.93      214.51     13.51 o 
  -4  -6  13      256.22      271.98     15.87 o 
  -3  -6  13      177.58      159.25      7.85 o 
  -2  -6  13      548.88      560.54     16.86 o 
  -1  -6  13      100.50       92.08      6.58 o 
   0  -6  13      164.96      150.23     13.64 o 
   1  -6  13       17.70       26.92      5.21 o 
   2  -6  13      626.38      639.25     21.32 o 
   3  -6  13       72.63       60.99      9.74 o 
   4  -6  13       62.92       68.25     10.44 o 
   5  -6  13      335.08      358.96     17.89 o 
   6  -6  13        4.48        5.84     12.52 o 
  -7  -5  13       14.73      -12.40     19.68 o 
  -6  -5  13       28.89       20.37     16.64 o 
  -5  -5  13     1220.43     1229.01     26.67 o 
  -4  -5  13        4.04        3.31      5.38 o 
  -3  -5  13       24.84       23.87      5.75 o 
  -2  -5  13       11.10       20.67      7.64 o 
  -1  -5  13       81.33       88.17     17.22 o 
   0  -5  13       13.82       -5.11      5.11 o 
   1  -5  13      420.40      483.52     11.77 o 
   2  -5  13       27.77       20.69      4.99 o 
   3  -5  13        4.07       87.43     10.67 o 
   4  -5  13      519.09      525.80     17.41 o 
   5  -5  13       17.24       27.91      9.04 o 
   6  -5  13       20.48       33.75     15.11 o 
   7  -5  13        0.32       -7.88     13.33 o 
  -8  -4  13       25.83       36.37     13.89 o 
  -7  -4  13       14.11       22.14     11.48 o 
  -6  -4  13       32.42       50.81     11.58 o 
  -5  -4  13       51.22       76.52     11.70 o 
  -4  -4  13      381.87      411.01     33.32 o 
  -3  -4  13      122.22      129.78      7.57 o 
  -2  -4  13     1024.16     1007.10     37.34 o 
  -1  -4  13       10.49       10.73      8.87 o 
   0  -4  13      258.94      347.07     10.32 o 
   1  -4  13      247.36      225.70      8.83 o 
   2  -4  13      865.93      808.62     47.95 o 
   3  -4  13        1.01        5.15     12.62 o 
   4  -4  13      329.63      366.70     11.16 o 
   5  -4  13     1472.79     1481.40     28.57 o 
   6  -4  13       47.96       45.81     11.01 o 
   7  -4  13      110.54      100.01     44.50 o 
   8  -4  13       34.25       46.32     13.73 o 
  -8  -3  13      202.82      191.65     19.95 o 
  -7  -3  13       21.79       31.84     11.42 o 
  -6  -3  13      132.62      143.34     12.98 o 
  -5  -3  13      572.20      641.71     18.40 o 
  -4  -3  13      142.18      130.30      7.72 o 
  -3  -3  13       55.70       51.87      7.71 o 
  -2  -3  13      141.80      255.68      9.98 o 
  -1  -3  13      717.88      764.32     17.46 o 
   0  -3  13      259.92      237.03      9.19 o 
   1  -3  13      558.64      454.90     12.88 o 
   2  -3  13     1921.36     1933.19     41.95 o 
   3  -3  13       12.02       17.66      9.92 o 
   4  -3  13      731.93      632.53     15.23 o 
   5  -3  13      159.89      134.08      8.12 o 
   6  -3  13        1.11       -7.36      8.54 o 
   7  -3  13        7.85       -9.28     21.11 o 
   8  -3  13      397.37      416.20     27.49 o 
  -8  -2  13      212.63      233.81     33.08 o 
  -7  -2  13       14.23       40.76     11.62 o 
  -6  -2  13      407.70      388.32     21.62 o 
  -5  -2  13       11.67       38.91      7.13 o 
  -4  -2  13        7.21       17.50      5.76 o 
  -3  -2  13      253.11      352.27     17.43 o 
  -2  -2  13     2335.55     2234.18     98.90 o 
  -1  -2  13      100.18      129.98     14.43 o 
   0  -2  13      305.00      340.37     10.09 o 
   1  -2  13     1766.75     1802.60     87.37 o 
   2  -2  13     1060.12     1091.25     21.84 o 
   3  -2  13       99.79      107.62     14.02 o 
   4  -2  13       65.56       63.94      8.15 o 
   5  -2  13     1009.80      991.64     25.42 o 
   6  -2  13       71.84       61.72     13.27 o 
   7  -2  13       11.84       15.37     10.39 o 
   8  -2  13      133.45       93.38     29.91 o 
  -8  -1  13      183.21      213.84     23.84 o 
  -7  -1  13       43.56       39.51     12.12 o 
  -6  -1  13       58.40       65.61     12.54 o 
  -5  -1  13      562.33      621.55     18.40 o 
  -4  -1  13       12.37       17.41      5.58 o 
  -3  -1  13      396.60      409.18     11.15 o 
  -2  -1  13      389.72      396.74     11.51 o 
  -1  -1  13      814.94      843.23     20.47 o 
   0  -1  13      335.23      336.44      9.91 o 
   1  -1  13      531.09      518.33     28.75 o 
   2  -1  13      559.11      515.59     17.49 o 
   3  -1  13       93.80       67.56     18.62 o 
   4  -1  13      557.17      470.39     13.88 o 
   5  -1  13        0.56       -0.63      6.48 o 
   6  -1  13        1.53       -5.49      5.59 o 
   7  -1  13        4.89       -0.83      9.28 o 
   8  -1  13       52.50       50.47     13.07 o 
   9  -1  13      125.78      129.67     24.59 o 
  -7   0  13       65.41       42.95     12.36 o 
  -6   0  13      523.91      410.32     31.95 o 
  -5   0  13       11.20       31.10      9.77 o 
  -4   0  13        1.82       17.34      9.72 o 
  -3   0  13        0.03       53.62     13.50 o 
  -2   0  13     1351.13     1373.63    136.04 o 
  -1   0  13      665.72      628.80     21.89 o 
   0   0  13      752.94      858.35     65.55 o 
   1   0  13     1695.41     1677.18     50.10 o 
   2   0  13      149.92      133.09      7.43 o 
   3   0  13      123.27      149.55      8.47 o 
   4   0  13        0.16        1.80      6.72 o 
   5   0  13     1461.36     1552.92     35.44 o 
   6   0  13      138.40      127.82     12.11 o 
   7   0  13      589.59      535.44     25.13 o 
   8   0  13      399.39      400.20     17.42 o 
   9   0  13       42.38       56.58     14.90 o 
  -7   1  13       11.88        8.79     10.76 o 
  -6   1  13       92.89      113.04     16.68 o 
  -5   1  13      582.06      637.42     19.28 o 
  -4   1  13       77.40       65.47     11.15 o 
  -3   1  13      953.35      863.57     26.38 o 
  -2   1  13      666.49      639.49     22.54 o 
  -1   1  13        5.99       19.34      5.28 o 
   0   1  13      801.53      789.05     21.16 o 
   1   1  13     1126.81     1000.80     24.32 o 
   2   1  13      469.99      461.97     14.33 o 
   3   1  13      372.61      360.44     10.39 o 
   4   1  13     1446.30     1488.72     38.53 o 
   5   1  13      159.80      247.96      9.99 o 
   6   1  13      168.21      164.28     22.75 o 
   7   1  13        2.49      207.30     13.57 o 
   8   1  13      451.99      432.65     18.50 o 
   9   1  13       50.96       83.73     14.56 o 
  -7   2  13        8.92       17.19      9.74 o 
  -6   2  13      363.44      348.81     16.80 o 
  -5   2  13       28.25       27.02     11.00 o 
  -4   2  13      159.95      150.36      8.09 o 
  -3   2  13      284.47      580.02     13.86 o 
  -2   2  13     1982.69     2032.26     41.52 o 
  -1   2  13      637.27      632.75     28.82 o 
   0   2  13      393.42      384.92     10.51 o 
   1   2  13     1068.04      976.19     27.08 o 
   2   2  13      258.04      257.23      8.90 o 
   3   2  13       33.90       34.71      8.03 o 
   4   2  13      109.00       87.93      9.82 o 
   5   2  13      730.43      772.35     31.82 o 
   6   2  13      287.68      259.61     15.72 o 
   7   2  13      154.80      152.98     24.69 o 
   8   2  13      192.78      191.33     15.33 o 
   9   2  13        7.41       -8.99     12.22 o 
  -7   3  13      112.37      133.54     15.83 o 
  -6   3  13        9.45       17.09      8.88 o 
  -5   3  13     1038.13     1155.29     25.94 o 
  -4   3  13      208.11      173.62     11.66 o 
  -3   3  13      692.70      669.25     21.72 o 
  -2   3  13      404.39      426.99     11.38 o 
  -1   3  13       15.67       32.64      8.90 o 
   0   3  13      351.05      309.66      9.47 o 
   1   3  13      786.26      814.01     19.24 o 
   2   3  13     2350.01     2212.58     46.42 o 
   3   3  13       71.48      104.09      7.06 o 
   4   3  13      339.50      297.91     25.61 o 
   5   3  13      329.88      298.47     10.29 o 
   6   3  13        3.29        4.13      5.32 o 
   7   3  13      136.34      236.73     14.24 o 
   8   3  13      419.53      413.10     18.03 o 
   9   3  13       21.61       24.64     16.64 o 
  -6   4  13      174.93      177.78     17.63 o 
  -5   4  13        0.77       -6.09      9.59 o 
  -4   4  13       20.03       26.32     10.21 o 
  -3   4  13        0.62      127.89      7.47 o 
  -2   4  13     1782.34     1595.49     32.34 o 
  -1   4  13        3.46       21.14      5.82 o 
   0   4  13       52.24       91.07      8.46 o 
   1   4  13       50.38       42.33      6.21 o 
   2   4  13      194.09      183.94      8.05 o 
   3   4  13      141.63      126.13      7.38 o 
   4   4  13      166.19      164.58     10.64 o 
   5   4  13      412.87      437.67     40.41 o 
   6   4  13      207.96      211.34     13.78 o 
   7   4  13      333.53      272.57     14.50 o 
   8   4  13      279.52      269.55     40.62 o 
   9   4  13        5.21       55.51     13.20 o 
  -6   5  13      113.25      122.71     23.39 o 
  -5   5  13      105.20      119.19     16.06 o 
  -4   5  13        4.00        9.36      8.22 o 
  -3   5  13      597.88      600.27     17.63 o 
  -2   5  13       36.90       30.72      5.56 o 
  -1   5  13       34.88       61.92      9.28 o 
   0   5  13      737.10      705.07     16.10 o 
   1   5  13      115.52       77.25      6.79 o 
   2   5  13      237.42      253.90      9.62 o 
   3   5  13      230.94      278.23      9.69 o 
   4   5  13     1682.90     1689.14     53.00 o 
   5   5  13       50.85      101.67      7.69 o 
   6   5  13      563.31      539.09     12.51 o 
   7   5  13      125.05      177.74     15.09 o 
   8   5  13      283.00      295.98     37.55 o 
   9   5  13        1.58       -0.10     11.49 o 
  -5   6  13       38.55       25.33     11.31 o 
  -4   6  13        9.27       26.06     16.57 o 
  -3   6  13       66.99      136.60     17.56 o 
  -2   6  13      383.84      386.54      9.91 o 
  -1   6  13       32.37       32.48     10.91 o 
   0   6  13      545.90      562.68     13.09 o 
   1   6  13      117.45       81.59      7.06 o 
   2   6  13       99.83      112.52      7.04 o 
   3   6  13     1514.83     1556.28     33.38 o 
   4   6  13       31.75       30.58      6.41 o 
   5   6  13     1432.73     1549.12     96.41 o 
   6   6  13      241.61      354.01     96.07 o 
   7   6  13      601.84      571.64     18.86 o 
   8   6  13       24.72       33.79     10.80 o 
   9   6  13       37.88       59.92     12.29 o 
  -5   7  13      138.49      158.78     17.34 o 
  -4   7  13      103.15       84.82     12.21 o 
  -3   7  13       50.81       88.88     10.63 o 
  -2   7  13       26.30       11.17     11.08 o 
  -1   7  13        1.26       36.83      9.17 o 
   0   7  13     1356.13     1278.52     79.66 o 
   1   7  13      859.21      860.43     40.17 o 
   2   7  13        5.01       94.15     16.10 o 
   3   7  13      166.42      127.76      9.07 o 
   4   7  13     2334.07     2362.70     57.60 o 
   5   7  13       23.02       39.58     15.79 o 
   6   7  13        0.86        4.74      8.71 o 
   7   7  13      566.50      611.15     19.10 o 
   8   7  13       20.29       20.20     10.92 o 
   9   7  13        7.99       -0.45     10.52 o 
  -4   8  13       53.97       43.90     13.39 o 
  -3   8  13       69.28      105.63     10.60 o 
  -2   8  13       28.48       19.51     19.95 o 
  -1   8  13      110.57       85.77     11.75 o 
   0   8  13       24.87       26.86      8.70 o 
   1   8  13     1135.07     1074.96     28.48 o 
   2   8  13        9.33       11.90      4.93 o 
   3   8  13      716.36      694.23     18.12 o 
   4   8  13       80.52      100.58     11.19 o 
   5   8  13       42.64       35.02     10.34 o 
   6   8  13      224.43      238.89     13.32 o 
   7   8  13      131.01      135.33     17.36 o 
   8   8  13      176.76      171.81     29.84 o 
  -3   9  13      222.56      217.71     26.57 o 
  -2   9  13       64.94       67.75     10.68 o 
  -1   9  13       56.61       53.48     12.14 o 
   0   9  13      687.53      649.92     50.27 o 
   1   9  13        5.41       17.67      9.24 o 
   2   9  13        1.59        1.46      8.58 o 
   3   9  13      113.30      112.14     11.29 o 
   4   9  13      409.75      460.64     18.71 o 
   5   9  13       14.23       37.02     11.00 o 
   6   9  13      242.24      268.21     15.86 o 
   7   9  13      348.70      316.16     18.42 o 
   8   9  13       10.70        2.06     19.44 o 
  -2  10  13       85.28       79.38     12.01 o 
  -1  10  13      256.30      189.94     20.36 o 
   0  10  13      243.91      237.29     26.70 o 
   1  10  13      627.75      572.02     19.29 o 
   2  10  13       35.13       11.18      8.55 o 
   3  10  13     1119.89     1051.93     23.58 o 
   4  10  13       22.74       29.01      9.54 o 
   5  10  13       48.24       32.25     10.86 o 
   6  10  13      116.70      165.85     34.41 o 
   7  10  13      237.55      193.64     16.81 o 
   0  11  13      573.69      534.46     19.69 o 
   1  11  13      231.68      222.85     14.79 o 
   2  11  13        1.10       -5.27     10.81 o 
   3  11  13      123.41      113.85     16.06 o 
   4  11  13      247.88      280.34     15.98 o 
   5  11  13        0.76       -3.91      9.45 o 
   6  11  13       22.39       33.08     10.36 o 
   3  12  13      133.08      175.53     18.62 o 
  -3 -10  14       49.69       24.41      9.59 o 
  -2 -10  14       17.14       -0.37      8.54 o 
  -1 -10  14       12.10       17.07     12.48 o 
   0 -10  14       98.22      108.35     12.16 o 
   1 -10  14      340.03      348.64     17.31 o 
  -5  -9  14       47.50       38.58     12.85 o 
  -4  -9  14        0.15        7.40     11.11 o 
  -3  -9  14      167.04      170.19     13.40 o 
  -2  -9  14       89.04       91.01     17.84 o 
  -1  -9  14       84.92       65.87     11.39 o 
   0  -9  14      358.48      393.72     29.94 o 
   1  -9  14       17.04        3.52      9.36 o 
   2  -9  14       22.32       29.90      9.23 o 
   3  -9  14        6.08       17.42      9.18 o 
  -5  -8  14        1.19      -11.13     11.13 o 
  -4  -8  14      236.04      255.06     16.79 o 
  -3  -8  14      133.60      152.89     42.59 o 
  -2  -8  14      107.34      101.29     11.02 o 
  -1  -8  14       47.38       58.54     21.52 o 
   0  -8  14      119.48      123.34     13.21 o 
   1  -8  14      304.95      273.19     15.43 o 
   2  -8  14        8.06       13.55      9.62 o 
   3  -8  14       61.18       67.43     11.18 o 
   4  -8  14       69.24       78.58     12.75 o 
  -6  -7  14        3.24        2.47     10.74 o 
  -5  -7  14       16.79       36.85      9.39 o 
  -4  -7  14        2.58        5.86     10.50 o 
  -3  -7  14      233.15      257.48     13.24 o 
  -2  -7  14      157.05      121.84     25.95 o 
  -1  -7  14       22.36        3.94      8.37 o 
   0  -7  14     1165.38     1087.76     23.10 o 
   1  -7  14        0.16        8.50      8.08 o 
   2  -7  14       37.02       32.56      9.26 o 
   3  -7  14      138.80      120.80     11.83 o 
   4  -7  14       88.09       88.68     11.40 o 
   5  -7  14       18.48       -5.61     11.97 o 
  -6  -6  14      396.00      418.79     17.67 o 
  -5  -6  14       15.93       13.58      9.85 o 
  -4  -6  14      457.13      546.48     18.18 o 
  -3  -6  14      524.01      498.96     16.68 o 
  -2  -6  14       22.45       31.90      8.39 o 
  -1  -6  14        1.44        5.02      7.20 o 
   0  -6  14      254.73      221.92     15.48 o 
   1  -6  14      165.13      171.04     41.13 o 
   2  -6  14        0.14        3.58      8.82 o 
   3  -6  14      514.78      471.21     16.98 o 
   4  -6  14      147.48      185.59     14.61 o 
   5  -6  14        0.16      -10.19     10.19 o 
   6  -6  14       83.47       84.02     12.52 o 
  -7  -5  14      112.81      125.26     18.82 o 
  -6  -5  14        1.72        1.85      9.78 o 
  -5  -5  14        0.05       -9.14      9.14 o 
  -4  -5  14       70.28       70.45     10.50 o 
  -3  -5  14      825.72      811.50     21.22 o 
  -2  -5  14        2.73       22.59      5.23 o 
  -1  -5  14        1.86        1.79      5.28 o 
   0  -5  14     1326.50     1264.66     27.22 o 
   1  -5  14        1.35        1.30     17.09 o 
   2  -5  14       69.28       46.94      6.65 o 
   3  -5  14      179.80      245.94     22.85 o 
   4  -5  14      139.84      136.14     11.94 o 
   5  -5  14        8.63       17.36     11.80 o 
   6  -5  14      255.63      245.01     31.54 o 
   7  -5  14      508.68      488.42     36.63 o 
  -7  -4  14        4.95       26.57     10.37 o 
  -6  -4  14       67.57       69.64     11.90 o 
  -5  -4  14       18.95       94.03     23.29 o 
  -4  -4  14     1447.74     1426.76     25.39 o 
  -3  -4  14      804.04      767.61     22.33 o 
  -2  -4  14      274.60      240.66      9.04 o 
  -1  -4  14      607.00      582.75     12.99 o 
   0  -4  14      146.79       98.81     16.20 o 
   1  -4  14       65.66       52.01     15.11 o 
   2  -4  14        0.55        4.01      6.51 o 
   3  -4  14     1238.85     1143.56     25.46 o 
   4  -4  14       19.47        9.55     13.91 o 
   5  -4  14      350.58      357.67     34.07 o 
   6  -4  14      303.42      271.71     21.89 o 
   7  -4  14      208.01      149.12     16.35 o 
  -7  -3  14      781.28      837.00     25.83 o 
  -6  -3  14       33.73        3.83     11.45 o 
  -5  -3  14        3.39       23.44      9.60 o 
  -4  -3  14      212.78      227.30     11.70 o 
  -3  -3  14      396.76      397.36     10.68 o 
  -2  -3  14       47.55       53.44      6.28 o 
  -1  -3  14      935.86      922.93     28.53 o 
   0  -3  14      490.65      488.39     11.88 o 
   1  -3  14       12.70        6.57      5.61 o 
   2  -3  14      988.19     1081.33     28.12 o 
   3  -3  14      193.79      164.62      9.45 o 
   4  -3  14     1470.55     1368.93     60.19 o 
   5  -3  14       56.66       93.05     11.24 o 
   6  -3  14      146.88      158.16     13.43 o 
   7  -3  14      341.71      292.63     17.02 o 
   8  -3  14        3.26       -1.66     11.68 o 
  -7  -2  14        5.32       56.52     31.92 o 
  -6  -2  14      394.14      425.79     28.00 o 
  -5  -2  14       53.61       86.26     17.22 o 
  -4  -2  14      501.88      466.02     11.10 o 
  -3  -2  14      398.77      450.19     11.48 o 
  -2  -2  14       22.82       45.70      7.17 o 
  -1  -2  14      410.39      346.75     14.02 o 
   0  -2  14      229.18      190.36     16.95 o 
   1  -2  14       59.58       71.59     11.29 o 
   2  -2  14        1.11        9.38      6.66 o 
   3  -2  14     2869.32     2611.67     62.89 o 
   4  -2  14      164.43      160.58      8.46 o 
   5  -2  14       42.05      127.05     12.82 o 
   6  -2  14      143.08      171.54     12.82 o 
   7  -2  14        4.81       -7.37     15.35 o 
   8  -2  14       71.56       97.51     12.40 o 
  -7  -1  14     1075.28     1105.76     27.80 o 
  -6  -1  14       27.50       52.90     11.98 o 
  -5  -1  14       12.85       34.02     10.87 o 
  -4  -1  14      105.61      110.68     10.33 o 
  -3  -1  14        2.13       19.14      5.72 o 
  -2  -1  14       77.30       64.93      6.68 o 
  -1  -1  14      788.29      792.82     47.10 o 
   0  -1  14     2933.16     2985.55     52.01 o 
   1  -1  14      157.83      139.20     33.35 o 
   2  -1  14      100.51       85.23     12.79 o 
   3  -1  14      147.77      132.76      9.40 o 
   4  -1  14      297.79      285.27     11.53 o 
   5  -1  14       12.08       32.53      7.33 o 
   6  -1  14       29.78       43.34     11.08 o 
   7  -1  14        6.80       11.09     10.15 o 
   8  -1  14        1.05       10.99     10.80 o 
  -7   0  14        0.77       49.27     13.74 o 
  -6   0  14      149.31      125.11     13.53 o 
  -5   0  14       24.30       19.61      9.86 o 
  -4   0  14     1213.98     1174.19     23.80 o 
  -3   0  14        2.81       -2.17      4.75 o 
  -2   0  14       11.11       85.13     10.13 o 
  -1   0  14     1759.16     1761.01     38.84 o 
   0   0  14      168.66      225.72      9.02 o 
   1   0  14       57.88       44.87      6.98 o 
   2   0  14      138.84      216.27     41.54 o 
   3   0  14      452.06      469.14     55.18 o 
   4   0  14       52.43       29.58      6.64 o 
   5   0  14      247.04      265.46     11.49 o 
   6   0  14      487.22      400.08     17.42 o 
   7   0  14        1.89        5.83     12.05 o 
   8   0  14       92.17      112.46     17.36 o 
   9   0  14       18.20        5.48     17.49 o 
  -7   1  14       29.78       36.20     12.94 o 
  -6   1  14        1.22        1.07     11.02 o 
  -5   1  14      555.42      614.51     38.54 o 
  -4   1  14      135.10      113.14     12.77 o 
  -3   1  14      403.45      424.06     15.04 o 
  -2   1  14      539.29      619.12     26.16 o 
  -1   1  14      532.88      523.14     25.27 o 
   0   1  14     2657.26     2926.74     49.67 o 
   1   1  14      174.76      156.02     15.07 o 
   2   1  14      291.34      360.96     18.62 o 
   3   1  14      342.92      360.32     11.76 o 
   4   1  14      160.31      131.78     19.51 o 
   5   1  14      383.30      372.14     25.68 o 
   6   1  14       49.85       47.24     12.04 o 
   7   1  14      689.74      679.32     22.21 o 
   8   1  14       99.96      106.94     14.26 o 
   9   1  14      281.29      253.52     18.02 o 
  -6   2  14       25.18       15.24     11.46 o 
  -5   2  14      216.91      171.65     13.49 o 
  -4   2  14      272.27      266.10     15.12 o 
  -3   2  14      428.01      487.02     18.62 o 
  -2   2  14       11.95       54.59     15.31 o 
  -1   2  14      468.53      434.77     14.32 o 
   0   2  14        1.06       18.07      5.23 o 
   1   2  14      113.02      126.06      7.43 o 
   2   2  14      299.15      581.84     52.18 o 
   3   2  14      634.87      755.86     34.24 o 
   4   2  14       19.55       37.20      7.47 o 
   5   2  14       53.75       57.75      7.09 o 
   6   2  14      581.25      510.55     27.38 o 
   7   2  14      171.56      169.07     14.08 o 
   8   2  14      155.08      146.15     16.64 o 
   9   2  14        8.96       27.60     12.65 o 
  -6   3  14        0.96       12.50      9.21 o 
  -5   3  14      149.59      167.73     14.18 o 
  -4   3  14      632.59      588.27     20.08 o 
  -3   3  14        1.20        2.20      4.53 o 
  -2   3  14       55.89       70.20     12.07 o 
  -1   3  14       46.47       47.94      7.47 o 
   0   3  14      232.84      306.96      9.74 o 
   1   3  14        8.36        3.16      5.79 o 
   2   3  14     1209.54     1230.83     32.00 o 
   3   3  14      117.28      123.09     13.44 o 
   4   3  14       32.14       39.50      6.24 o 
   5   3  14      513.07      591.37     15.65 o 
   6   3  14        1.08       14.21      9.96 o 
   7   3  14      117.51      123.04     11.69 o 
   8   3  14       96.11       90.01     19.27 o 
   9   3  14      595.65      563.25     70.05 o 
  -6   4  14       38.30       26.71     23.16 o 
  -5   4  14       71.59       73.45     12.01 o 
  -4   4  14      384.17      368.46     31.44 o 
  -3   4  14      138.61      158.33     11.66 o 
  -2   4  14       52.16       46.40      5.69 o 
  -1   4  14     1279.31     1163.44     27.18 o 
   0   4  14      321.63      302.38      9.48 o 
   1   4  14       23.40       11.79      5.64 o 
   2   4  14       46.02      182.81      9.19 o 
   3   4  14      442.55      549.02     20.12 o 
   4   4  14        1.76       16.88      6.08 o 
   5   4  14      822.79      841.01     24.09 o 
   6   4  14      358.12      328.94     14.70 o 
   7   4  14       42.81       32.56     11.37 o 
   8   4  14      337.27      322.19     48.87 o 
   9   4  14      116.33       79.87     16.88 o 
  -5   5  14       79.44      103.43     13.42 o 
  -4   5  14      535.20      471.61     27.93 o 
  -3   5  14       27.63       24.11      9.65 o 
  -2   5  14      257.73      250.31     29.70 o 
  -1   5  14       53.47       32.83      5.26 o 
   0   5  14      288.02      384.61     10.39 o 
   1   5  14        6.01        7.33      4.68 o 
   2   5  14      144.09      119.89      6.92 o 
   3   5  14      565.45      488.19     11.65 o 
   4   5  14        3.63       20.69      7.34 o 
   5   5  14     1536.02     1500.07     63.60 o 
   6   5  14      240.71      171.77     13.91 o 
   7   5  14       44.06       32.97     11.61 o 
   8   5  14       26.29       21.91      9.87 o 
   9   5  14      618.30      662.90     82.97 o 
  -5   6  14      140.08      126.01     29.70 o 
  -4   6  14       15.43       21.47     11.04 o 
  -3   6  14      208.60      202.71     14.11 o 
  -2   6  14       22.95       21.57      7.70 o 
  -1   6  14     1060.87     1002.64     44.03 o 
   0   6  14        6.27       16.18      4.89 o 
   1   6  14     1433.82     1346.13     27.63 o 
   2   6  14      282.46      342.29      9.79 o 
   3   6  14     1503.54     1492.92     28.04 o 
   4   6  14       92.78      108.56     12.35 o 
   5   6  14       58.07       69.41     11.08 o 
   6   6  14     1020.42      969.48     34.24 o 
   7   6  14       83.81       85.94     11.95 o 
   8   6  14      100.35      129.53     13.84 o 
   9   6  14        3.21       13.56     10.66 o 
  -4   7  14      191.42      208.32     16.43 o 
  -3   7  14       31.54        9.75     21.04 o 
  -2   7  14      109.93      129.85     12.91 o 
  -1   7  14       48.56       61.28      9.42 o 
   0   7  14      275.33      343.40     16.48 o 
   1   7  14       59.86      168.10     87.81 o 
   2   7  14     1430.02     1344.21     24.33 o 
   3   7  14      501.13      422.29     12.35 o 
   4   7  14       53.83      125.35     11.54 o 
   5   7  14      377.82      418.63     17.29 o 
   6   7  14       62.16       74.55     11.36 o 
   7   7  14       49.98       47.69     14.66 o 
   8   7  14       53.40       37.53     11.78 o 
  -3   8  14        4.73       -8.02      9.66 o 
  -2   8  14        5.71       -5.11      8.79 o 
  -1   8  14      591.73      584.43     19.05 o 
   0   8  14       50.04       22.73      9.90 o 
   1   8  14       64.56       73.05      9.65 o 
   2   8  14      157.03      193.24     18.69 o 
   3   8  14      470.56      387.69     15.28 o 
   4   8  14       30.74       36.33      9.58 o 
   5   8  14       11.11        3.18      9.79 o 
   6   8  14       71.44       78.56     12.37 o 
   7   8  14        8.28       21.62     22.85 o 
   8   8  14      278.67      263.85     17.91 o 
  -2   9  14      383.52      416.96     24.01 o 
  -1   9  14        2.30        0.00      8.41 o 
   0   9  14       30.25       30.36     18.45 o 
   1   9  14      137.46      124.67     12.01 o 
   2   9  14      421.08      412.46     16.37 o 
   3   9  14        3.13       23.21     19.13 o 
   4   9  14       16.81       37.27     12.15 o 
   5   9  14      217.28      234.38     15.58 o 
   6   9  14        8.94        4.27     10.77 o 
   7   9  14        9.80       26.37     11.01 o 
  -1  10  14      489.75      457.90     26.94 o 
   0  10  14        5.79        4.41      9.59 o 
   1  10  14      116.46      123.37     15.96 o 
   2  10  14      288.49      311.60     16.56 o 
   3  10  14       27.22       38.35     12.61 o 
   4  10  14      198.82      162.99     13.50 o 
   5  10  14       34.72       43.03     15.82 o 
   6  10  14      170.62      178.67     14.93 o 
   1  11  14      138.03      144.17     19.57 o 
   2  11  14      392.18      363.45     17.31 o 
   3  11  14      143.78      119.14     14.29 o 
   4  11  14       42.53       56.83     11.57 o 
   5  11  14      122.17      126.91     12.99 o 
  -3  -9  15       14.12       14.03      9.28 o 
  -2  -9  15      254.00      263.55     29.64 o 
  -1  -9  15       56.65       45.99      9.99 o 
   0  -9  15        1.32        4.85     10.26 o 
   1  -9  15       13.22        7.73     14.08 o 
   2  -9  15      109.19      116.63     13.45 o 
  -4  -8  15       33.47       33.54     16.74 o 
  -3  -8  15        5.96        5.46      7.82 o 
  -2  -8  15       40.59       13.56     27.11 o 
  -1  -8  15      640.45      633.28     20.54 o 
   0  -8  15      101.43       96.44     10.96 o 
   1  -8  15      319.86      336.46     19.85 o 
   2  -8  15      129.93      102.22     12.88 o 
   3  -8  15        6.47       15.88     10.15 o 
  -5  -7  15      164.25      167.65     14.25 o 
  -4  -7  15      151.62      224.24     40.55 o 
  -3  -7  15      116.77      118.14     19.34 o 
  -2  -7  15      260.97      257.49     16.34 o 
  -1  -7  15       35.59       30.03     14.70 o 
   0  -7  15       87.10       84.68     11.94 o 
   1  -7  15        0.71        8.07     10.61 o 
   2  -7  15      669.54      592.36     19.32 o 
   3  -7  15       22.14       13.19      9.56 o 
   4  -7  15       68.28       58.16     13.01 o 
  -6  -6  15       48.65       77.80     13.30 o 
  -5  -6  15      336.82      349.91     17.71 o 
  -4  -6  15        0.86       10.70     15.21 o 
  -3  -6  15        1.49       -7.50     10.81 o 
  -2  -6  15        0.03       55.36     11.02 o 
  -1  -6  15      366.81      415.41     15.72 o 
   0  -6  15       29.08       14.48      8.45 o 
   1  -6  15     1294.97     1218.95     24.57 o 
   2  -6  15      196.37      220.63     13.18 o 
   3  -6  15       12.66       25.63     10.44 o 
   4  -6  15      136.74      135.78     12.53 o 
   5  -6  15       32.19       45.30     11.13 o 
  -6  -5  15        0.67       -5.64     12.48 o 
  -5  -5  15      117.33      130.71     11.78 o 
  -4  -5  15      230.79      256.15     32.43 o 
  -3  -5  15       72.25       54.21      8.73 o 
  -2  -5  15     1486.62     1567.48     48.19 o 
  -1  -5  15       10.45       -1.87     14.46 o 
   0  -5  15      145.62      112.38     11.22 o 
   1  -5  15      183.19      162.56     16.78 o 
   2  -5  15      554.98      462.36     37.75 o 
   3  -5  15        5.72       11.99      8.44 o 
   4  -5  15       80.14      106.77     11.07 o 
   5  -5  15      191.62      170.58     14.28 o 
   6  -5  15       41.43       30.83     11.77 o 
  -6  -4  15       17.95       34.50     11.09 o 
  -5  -4  15      300.66      302.79     15.99 o 
  -4  -4  15        8.76       16.33     11.53 o 
  -3  -4  15      188.22      180.80     19.27 o 
  -2  -4  15        0.15      216.62     22.81 o 
  -1  -4  15       47.65       48.61      7.67 o 
   0  -4  15       36.81       29.40      5.90 o 
   1  -4  15      511.04      495.48     11.60 o 
   2  -4  15      390.03      425.27     13.13 o 
   3  -4  15      206.03      194.78     34.38 o 
   4  -4  15      466.62      477.29     18.57 o 
   5  -4  15        1.10        3.32     10.42 o 
   6  -4  15       34.45       34.87     11.53 o 
   7  -4  15        3.35       19.06     19.13 o 
  -6  -3  15      124.16      148.63     14.16 o 
  -5  -3  15        1.38       -2.88      9.53 o 
  -4  -3  15      212.02      263.43     20.12 o 
  -3  -3  15       12.58       23.53     18.14 o 
  -2  -3  15     2022.64     2021.40     46.48 o 
  -1  -3  15       47.35       53.92      6.07 o 
   0  -3  15      167.48      193.93     14.97 o 
   1  -3  15      454.28      455.71     19.06 o 
   2  -3  15       67.23       94.27      8.29 o 
   3  -3  15       14.79       11.57      5.85 o 
   4  -3  15       10.55       16.83      8.17 o 
   5  -3  15     1240.38     1203.52     26.66 o 
   6  -3  15       14.80       15.82     12.85 o 
   7  -3  15        2.55        5.20     14.97 o 
  -6  -2  15      237.23      253.27     25.47 o 
  -5  -2  15      434.52      476.24     28.24 o 
  -4  -2  15        1.96       20.26      9.14 o 
  -3  -2  15      353.46      414.36     20.29 o 
  -2  -2  15       96.27      218.88     20.29 o 
  -1  -2  15      306.33      329.65     10.26 o 
   0  -2  15      179.22      133.70     11.77 o 
   1  -2  15      508.25      540.83     16.16 o 
   2  -2  15      709.47      697.04     34.58 o 
   3  -2  15        2.22        5.33      5.99 o 
   4  -2  15      497.89      483.92     12.00 o 
   5  -2  15        2.66       11.22      9.35 o 
   6  -2  15        3.15        0.18     10.31 o 
   7  -2  15        0.60       -8.02     12.08 o 
   8  -2  15      234.91      246.30     17.30 o 
  -6  -1  15      510.62      519.99     33.35 o 
  -5  -1  15      117.84       99.83     14.81 o 
  -4  -1  15       95.17      132.65     11.68 o 
  -3  -1  15      106.54       93.45      7.30 o 
  -2  -1  15      203.22      220.28     10.88 o 
  -1  -1  15       51.86       88.32      6.98 o 
   0  -1  15       40.12      106.17      7.18 o 
   1  -1  15      733.54      602.20     25.00 o 
   2  -1  15       33.70       16.09     12.48 o 
   3  -1  15       10.29       -9.18      9.48 o 
   4  -1  15      500.64      521.98     30.45 o 
   5  -1  15      393.05      488.37     17.00 o 
   6  -1  15       31.14       38.94     12.83 o 
   7  -1  15      226.73      191.81     16.87 o 
   8  -1  15       87.75      111.39     17.32 o 
  -6   0  15       55.71       88.76     12.76 o 
  -5   0  15      163.11      190.77     14.49 o 
  -4   0  15       17.53        2.79      9.37 o 
  -3   0  15      759.84      794.96     50.47 o 
  -2   0  15      311.08      269.09      9.73 o 
  -1   0  15        9.68       39.04      9.99 o 
   0   0  15        0.86       11.14      5.03 o 
   1   0  15      455.15      485.43     12.50 o 
   2   0  15      819.60      817.77     28.41 o 
   3   0  15        7.15        0.00      7.57 o 
   4   0  15      845.79      829.74     46.24 o 
   5   0  15      159.80      125.95     13.27 o 
   6   0  15        4.58        7.22      9.21 o 
   7   0  15       12.51       39.45     10.72 o 
   8   0  15       30.57       33.29     11.82 o 
  -6   1  15      237.86      223.12     16.88 o 
  -5   1  15        0.29        0.53      9.25 o 
  -4   1  15        9.46        3.41      8.27 o 
  -3   1  15       28.08      118.43     33.42 o 
  -2   1  15      150.34      165.59      7.76 o 
  -1   1  15       98.25      113.33      6.99 o 
   0   1  15      431.70      475.94     11.79 o 
   1   1  15     1971.94     1733.09     46.82 o 
   2   1  15       71.22       69.40      6.34 o 
   3   1  15        1.30        5.75      5.01 o 
   4   1  15      109.24      115.60     17.43 o 
   5   1  15      323.14      400.80     10.91 o 
   6   1  15       49.18       83.43     12.75 o 
   7   1  15      691.26      659.55     52.35 o 
   8   1  15      107.17       98.96     13.48 o 
  -6   2  15       43.73       59.68     16.78 o 
  -5   2  15      114.89      168.21     14.58 o 
  -4   2  15        0.02       -2.07      8.53 o 
  -3   2  15      782.03      907.28     20.77 o 
  -2   2  15      158.21      137.66      7.67 o 
  -1   2  15      154.66      196.19      8.59 o 
   0   2  15        7.94        7.86      4.90 o 
   1   2  15     1172.50     1109.95     29.88 o 
   2   2  15      578.05      617.91     19.30 o 
   3   2  15      154.64      219.75     17.63 o 
   4   2  15      545.60      535.24     18.52 o 
   5   2  15      110.78      123.62     18.65 o 
   6   2  15       46.73       24.98     10.55 o 
   7   2  15       54.27      175.22     54.97 o 
   8   2  15      502.90      467.22     40.38 o 
  -5   3  15       64.17       66.69     12.71 o 
  -4   3  15       14.34       13.38      9.88 o 
  -3   3  15        1.00       40.31      9.97 o 
  -2   3  15      270.71      288.69      8.92 o 
  -1   3  15      130.54      171.30      7.59 o 
   0   3  15      163.78      193.73      9.82 o 
   1   3  15      707.05      626.55     13.86 o 
   2   3  15       19.07       21.21      5.23 o 
   3   3  15      574.15      559.70     12.53 o 
   4   3  15      201.59      210.31      8.92 o 
   5   3  15       84.67      152.09     12.35 o 
   6   3  15       71.00       45.97     12.04 o 
   7   3  15      252.95      238.44     18.59 o 
   8   3  15       98.87      113.42     14.75 o 
   9   3  15       40.25       50.99     17.73 o 
  -5   4  15      158.92      214.72     33.56 o 
  -4   4  15        4.37       -1.40     10.88 o 
  -3   4  15      740.89      733.41     22.47 o 
  -2   4  15       90.61       81.77     10.33 o 
  -1   4  15        1.07       47.60     12.65 o 
   0   4  15      105.35      112.99     10.16 o 
   1   4  15      242.13      207.14      8.61 o 
   2   4  15       34.46       72.85     13.78 o 
   3   4  15       66.84       63.81      6.08 o 
   4   4  15     1461.09     1448.66     46.24 o 
   5   4  15       32.62       34.83     10.77 o 
   6   4  15      172.59      185.16     18.72 o 
   7   4  15      259.89      325.04     16.91 o 
   8   4  15      176.42      180.32     16.60 o 
  -5   5  15        1.03        1.71     11.59 o 
  -4   5  15       11.39       13.62      9.91 o 
  -3   5  15        7.60      104.53     12.28 o 
  -2   5  15      536.25      475.55     20.56 o 
  -1   5  15       73.67       70.04     10.26 o 
   0   5  15      853.88      844.41     69.91 o 
   1   5  15      334.06      330.14      9.55 o 
   2   5  15      250.86      214.22     15.82 o 
   3   5  15      936.17      898.82     21.46 o 
   4   5  15       22.56       11.77      5.25 o 
   5   5  15      486.47      527.19     31.48 o 
   6   5  15       89.19      128.20     39.18 o 
   7   5  15      398.60      343.09     18.23 o 
   8   5  15      132.06      140.46     15.46 o 
  -4   6  15        1.75       -5.25     11.16 o 
  -3   6  15      443.06      421.40     17.34 o 
  -2   6  15       83.47       75.02     11.81 o 
  -1   6  15      180.92      226.45     15.13 o 
   0   6  15      935.71      843.88     19.92 o 
   1   6  15        3.15        7.92     10.61 o 
   2   6  15        0.46       -1.49      8.05 o 
   3   6  15      122.53       99.82     23.36 o 
   4   6  15      700.79      709.22     49.59 o 
   5   6  15       88.71       95.53     11.67 o 
   6   6  15       99.00       85.25     18.59 o 
   7   6  15      241.66      277.25     15.90 o 
   8   6  15      117.55      126.69     14.13 o 
  -3   7  15       52.17       67.29     12.55 o 
  -2   7  15      498.95      414.25     20.24 o 
  -1   7  15      102.57       68.80     19.10 o 
   0   7  15        6.13        8.31      8.35 o 
   1   7  15      878.99      854.68     22.12 o 
   2   7  15        4.22       14.84      9.26 o 
   3   7  15      540.34      528.25     18.45 o 
   4   7  15       14.61       14.19      9.78 o 
   5   7  15      201.61      184.75     15.04 o 
   6   7  15      191.23      215.61     30.93 o 
   7   7  15      300.23      303.69     17.68 o 
   8   7  15       43.80       50.33     12.63 o 
  -2   8  15        2.55       -1.89      8.77 o 
  -1   8  15        1.69       27.94     10.22 o 
   0   8  15      498.01      477.61     17.73 o 
   1   8  15      138.20      119.39     11.99 o 
   2   8  15       74.37       58.98     10.13 o 
   3   8  15       14.03       -6.84     10.87 o 
   4   8  15      738.59      753.55     25.10 o 
   5   8  15       49.58       38.49     10.68 o 
   6   8  15       23.17       34.54     11.96 o 
   7   8  15      103.10      122.03     14.00 o 
  -1   9  15      192.57      151.66     25.61 o 
   0   9  15       34.89       31.78     10.03 o 
   1   9  15      496.93      488.17     18.96 o 
   2   9  15       73.35       57.05      9.71 o 
   3   9  15      325.62      309.83     18.18 o 
   4   9  15       28.68       33.85     12.96 o 
   5   9  15       79.32       92.31     13.10 o 
   6   9  15       52.45       92.00     12.42 o 
   1  10  15       58.77       61.68     10.63 o 
   2  10  15        1.30        7.72      9.44 o 
   3  10  15       33.56       29.22     10.68 o 
   4  10  15      122.24      149.69     35.33 o 
   5  10  15        0.73        4.06     10.10 o 
  -3  -8  16      114.21       89.55     18.35 o 
  -2  -8  16       51.33       33.75      9.54 o 
  -1  -8  16      182.26      189.69     13.50 o 
   0  -8  16      429.64      415.00     18.09 o 
   1  -8  16        1.52        6.07      8.61 o 
   2  -8  16       29.69       31.42     10.77 o 
  -4  -7  16      146.95      134.67     14.19 o 
  -3  -7  16      132.00      116.84     12.53 o 
  -2  -7  16       99.46       74.27     11.75 o 
  -1  -7  16       27.12       18.81      9.18 o 
   0  -7  16      136.68      125.77     11.87 o 
   1  -7  16      250.16      274.98     36.05 o 
   2  -7  16       10.96        7.21     10.04 o 
   3  -7  16      195.80      218.11     16.00 o 
  -5  -6  16       22.09       19.18     17.05 o 
  -4  -6  16       16.15       -9.24      9.24 o 
  -3  -6  16      627.89      555.06     18.63 o 
  -2  -6  16      113.08      106.91     18.72 o 
  -1  -6  16       32.45       33.18     11.59 o 
   0  -6  16     1140.72     1069.16     38.23 o 
   1  -6  16       31.57       39.22     10.84 o 
   2  -6  16      142.52      165.30     16.27 o 
   3  -6  16       70.75      115.55     22.75 o 
   4  -6  16       20.44       42.87     11.92 o 
  -5  -5  16       41.53       19.99     14.90 o 
  -4  -5  16      264.14      343.37     17.75 o 
  -3  -5  16      235.72      247.58     15.11 o 
  -2  -5  16       53.21       36.43     10.16 o 
  -1  -5  16       98.30      113.62     11.17 o 
   0  -5  16        5.68        6.33      8.40 o 
   1  -5  16       80.87       43.60     27.04 o 
   2  -5  16        0.22        2.19      7.52 o 
   3  -5  16      762.22      675.91     21.45 o 
   4  -5  16      114.99      133.21     13.21 o 
   5  -5  16       51.34       54.68     13.32 o 
  -5  -4  16       33.00       22.19     11.67 o 
  -4  -4  16      124.26      116.38     11.86 o 
  -3  -4  16      318.07      375.47     15.50 o 
  -2  -4  16       38.21       44.35      9.92 o 
  -1  -4  16      219.95      187.20     12.13 o 
   0  -4  16      148.65      129.64     11.62 o 
   1  -4  16        0.14        5.07     11.32 o 
   2  -4  16      287.26      228.61     13.20 o 
   3  -4  16       20.40       81.32     17.22 o 
   4  -4  16      288.15      241.05     22.64 o 
   5  -4  16       27.95       35.62     13.23 o 
   6  -4  16       23.33       47.66     12.37 o 
  -6  -3  16        8.71        5.03      9.99 o 
  -5  -3  16        0.41       22.81     14.70 o 
  -4  -3  16      460.22      447.72     18.83 o 
  -3  -3  16      309.87      349.33     16.85 o 
  -2  -3  16        1.13       -3.92      8.29 o 
  -1  -3  16     1802.63     1654.41     68.31 o 
   0  -3  16      123.48       84.30      6.34 o 
   1  -3  16      174.79      142.06     12.86 o 
   2  -3  16       21.32       15.81      9.37 o 
   3  -3  16      409.47      394.70     32.81 o 
   4  -3  16       92.23       78.65     12.29 o 
   5  -3  16       41.80       33.02     13.76 o 
   6  -3  16      159.54      167.51     14.17 o 
   7  -3  16       41.36       54.97     15.11 o 
  -6  -2  16       56.84       58.91     15.23 o 
  -5  -2  16      267.45      230.22     16.54 o 
  -4  -2  16      283.84      299.82     15.98 o 
  -3  -2  16      461.06      472.36     16.49 o 
  -2  -2  16        8.87       13.44      7.88 o 
  -1  -2  16      233.80      260.28     13.71 o 
   0  -2  16      617.03      732.76     20.62 o 
   1  -2  16       41.58       30.27      5.21 o 
   2  -2  16      106.02      119.50      7.09 o 
   3  -2  16       48.73       54.28     11.52 o 
   4  -2  16       86.30       96.36     18.79 o 
   5  -2  16        7.60       33.00     11.56 o 
   6  -2  16      184.64      198.72     22.23 o 
   7  -2  16       61.95       61.23     14.28 o 
  -6  -1  16      132.41      104.67     19.81 o 
  -5  -1  16        0.24       38.03     11.56 o 
  -4  -1  16      712.43      692.59     20.88 o 
  -3  -1  16        8.11       13.99     14.66 o 
  -2  -1  16        9.59        4.00     17.49 o 
  -1  -1  16      713.80      697.33     19.81 o 
   0  -1  16      204.97      257.84     12.52 o 
   1  -1  16      258.90      249.34     14.97 o 
   2  -1  16        2.23       -4.99      5.19 o 
   3  -1  16      890.05      829.53     20.30 o 
   4  -1  16       93.57       95.06     10.44 o 
   5  -1  16        3.67       91.33     37.00 o 
   6  -1  16      592.27      537.86     38.98 o 
   7  -1  16       23.87        6.99     11.12 o 
  -6   0  16       21.66       29.47     12.05 o 
  -5   0  16       67.12       78.65     13.04 o 
  -4   0  16      274.28      260.12     20.19 o 
  -3   0  16      105.43       91.92     11.08 o 
  -2   0  16        1.16       -7.14      7.14 o 
  -1   0  16       62.78       68.31      9.45 o 
   0   0  16       37.39       39.08      5.50 o 
   1   0  16        3.86       19.16      6.01 o 
   2   0  16      597.23      633.82     15.55 o 
   3   0  16       39.57       29.15      6.57 o 
   4   0  16      145.57      131.25     12.59 o 
   5   0  16      119.62      108.51     21.72 o 
   6   0  16      188.50      228.11     28.95 o 
   7   0  16        1.59       17.69     11.43 o 
   8   0  16       16.20       12.20     11.16 o 
  -5   1  16       84.09      105.80     13.26 o 
  -4   1  16      133.99      139.38     11.58 o 
  -3   1  16        2.94        5.28      6.88 o 
  -2   1  16      197.87      226.10     13.33 o 
  -1   1  16      636.69      600.70     18.89 o 
   0   1  16       86.02      146.65      8.32 o 
   1   1  16       43.33       54.87     10.74 o 
   2   1  16        8.04       47.33      6.17 o 
   3   1  16      185.12      193.76      8.39 o 
   4   1  16        4.20       -5.27     10.02 o 
   5   1  16      127.11      160.89     12.99 o 
   6   1  16      760.58      772.47     83.07 o 
   7   1  16       59.42       49.59     55.01 o 
   8   1  16      241.47      225.87     16.28 o 
  -5   2  16      532.31      449.45     19.98 o 
  -4   2  16       80.59       51.42     30.49 o 
  -3   2  16      118.67      129.69     16.98 o 
  -2   2  16      135.86      142.05     10.88 o 
  -1   2  16       43.70       36.54      9.89 o 
   0   2  16     1111.83     1089.74     23.44 o 
   1   2  16        8.84        8.03      5.42 o 
   2   2  16     1702.79     1668.76     29.32 o 
   3   2  16      256.37      227.97      8.78 o 
   4   2  16        2.88       44.19     11.33 o 
   5   2  16      575.88      553.58     45.90 o 
   6   2  16      226.75      216.85     16.43 o 
   7   2  16      225.41      197.87     40.55 o 
   8   2  16       34.31       22.77     18.14 o 
  -5   3  16      100.15      115.30     13.16 o 
  -4   3  16      570.06      537.33     19.85 o 
  -3   3  16       28.53       39.18     13.06 o 
  -2   3  16        0.31        1.73     12.45 o 
  -1   3  16     1347.96     1272.73     72.54 o 
   0   3  16        0.02       10.10      4.11 o 
   1   3  16      438.06      416.80     23.97 o 
   2   3  16      456.76      605.95     18.22 o 
   3   3  16      399.00      396.63     17.12 o 
   4   3  16        0.23       11.56     11.32 o 
   5   3  16       91.33      108.47     14.43 o 
   6   3  16      381.23      392.13     47.37 o 
   7   3  16      181.13      152.17     16.21 o 
   8   3  16       14.82       29.34     10.34 o 
  -4   4  16      358.70      287.65     15.98 o 
  -3   4  16       20.94       34.30     10.15 o 
  -2   4  16       54.07       47.88      9.26 o 
  -1   4  16        0.44        5.04      6.83 o 
   0   4  16       18.77       40.32      7.74 o 
   1   4  16        0.21        4.02     11.42 o 
   2   4  16     1971.34     1855.57     27.99 o 
   3   4  16       74.28       81.13     20.97 o 
   4   4  16      160.18      321.75     32.30 o 
   5   4  16      835.59      766.87     53.27 o 
   6   4  16       20.85       16.71     10.05 o 
   7   4  16       76.45       65.62     14.56 o 
   8   4  16       89.12       87.33     14.04 o 
  -4   5  16       11.82        8.03     11.25 o 
  -3   5  16      205.22      195.78     15.05 o 
  -2   5  16       98.60      107.25     10.94 o 
  -1   5  16      905.12      861.35     21.81 o 
   0   5  16       26.11       32.19     11.22 o 
   1   5  16      415.22      391.67     23.53 o 
   2   5  16      280.00      406.66     21.45 o 
   3   5  16      655.62      610.60     17.84 o 
   4   5  16        8.81       24.05      9.82 o 
   5   5  16       34.24       33.31     11.20 o 
   6   5  16      397.29      418.03     40.00 o 
   7   5  16        1.02       18.02     17.29 o 
   8   5  16      124.36      157.39     30.59 o 
  -3   6  16        7.49       11.10      9.32 o 
  -2   6  16      497.87      422.15     17.16 o 
  -1   6  16       12.59       21.51      9.96 o 
   0   6  16      386.31      429.41     16.28 o 
   1   6  16       43.93       49.25     19.44 o 
   2   6  16      445.54      439.15     23.84 o 
   3   6  16       65.46       57.35      9.17 o 
   4   6  16       47.66      105.23     14.02 o 
   5   6  16      297.08      298.80     15.78 o 
   6   6  16      190.27      186.07     20.09 o 
   7   6  16        0.62       -0.35      9.55 o 
  -2   7  16       29.14       27.28     10.49 o 
  -1   7  16      577.26      595.74     19.92 o 
   0   7  16       37.41       28.88     10.00 o 
   1   7  16      327.26      354.56     23.09 o 
   2   7  16       79.80      101.31     11.33 o 
   3   7  16       54.99       72.01     10.78 o 
   4   7  16        0.39        3.34     12.24 o 
   5   7  16       58.17       56.27     17.36 o 
   6   7  16      191.48      221.51     15.31 o 
   7   7  16        2.29       24.91     11.45 o 
  -1   8  16        0.24       -1.80      9.06 o 
   0   8  16      129.59      117.33     21.45 o 
   1   8  16      101.71      129.99     25.13 o 
   2   8  16      362.75      345.62     30.59 o 
   3   8  16       29.57       38.30      9.21 o 
   4   8  16        0.63       37.02     11.87 o 
   5   8  16      316.57      303.93     15.60 o 
   6   8  16        1.61      -13.54     13.54 o 
   0   9  16        9.13       24.95     10.12 o 
   1   9  16      117.26      109.40     22.71 o 
   2   9  16      145.43      152.03     33.42 o 
   3   9  16       21.31        2.69     14.46 o 
   4   9  16       19.01       27.05     15.07 o 
   5   9  16      174.86      140.86     25.68 o 
  -3  -7  17       93.76      131.49     11.81 o 
  -2  -7  17        2.87       33.19     29.77 o 
  -1  -7  17     1135.93     1035.32     26.37 o 
   0  -7  17       18.65       15.46     15.86 o 
   1  -7  17      413.66      409.14     19.26 o 
   2  -7  17      281.53      237.49     16.08 o 
  -4  -6  17      110.04      122.76     14.68 o 
  -3  -6  17       22.27       42.60     13.95 o 
  -2  -6  17      210.22      212.20     16.20 o 
  -1  -6  17      167.22      162.89     14.18 o 
   0  -6  17       37.32       14.07     10.20 o 
   1  -6  17      103.28       94.25     11.11 o 
   2  -6  17      295.84      286.18     17.15 o 
   3  -6  17        2.50       13.37      9.59 o 
  -4  -5  17       13.11       24.03     13.44 o 
  -3  -5  17        5.40       10.07      9.20 o 
  -2  -5  17       11.46       31.57      9.62 o 
  -1  -5  17        3.10        8.26     10.13 o 
   0  -5  17       14.04       -9.31      9.31 o 
   1  -5  17      399.90      396.15     25.07 o 
   2  -5  17        9.32        9.00     11.15 o 
   3  -5  17       14.15       18.59     14.77 o 
   4  -5  17      340.27      326.77     40.85 o 
  -5  -4  17       56.70       69.12     16.54 o 
  -4  -4  17       63.88       98.19     15.04 o 
  -3  -4  17       41.07       59.16     10.28 o 
  -2  -4  17      742.80      739.34     26.26 o 
  -1  -4  17        2.77        2.08      9.25 o 
   0  -4  17      279.97      240.09     14.83 o 
   1  -4  17      280.66      292.62     13.99 o 
   2  -4  17      229.62      215.46     17.84 o 
   3  -4  17        0.32        8.24     10.17 o 
   4  -4  17      113.80      119.41     13.19 o 
   5  -4  17      366.86      328.20     18.92 o 
  -5  -3  17       44.65       51.83     28.48 o 
  -4  -3  17       34.81       44.82     11.25 o 
  -3  -3  17      234.48      257.68     15.14 o 
  -2  -3  17       15.78       80.45     14.56 o 
  -1  -3  17       87.43       86.58     11.06 o 
   0  -3  17      213.26      219.75     13.75 o 
   1  -3  17      219.24      242.58     21.66 o 
   2  -3  17      157.63      146.08     14.97 o 
   3  -3  17       28.66       37.75     10.61 o 
   4  -3  17       96.12       63.96     11.89 o 
   5  -3  17       37.49       48.75     11.77 o 
   6  -3  17        6.09        7.02     11.12 o 
  -5  -2  17        7.43       22.48     10.78 o 
  -4  -2  17        5.26       20.77     10.18 o 
  -3  -2  17        0.29        5.55     10.39 o 
  -2  -2  17      748.93      743.48     20.79 o 
  -1  -2  17       31.52       23.60      9.41 o 
   0  -2  17      143.02      157.41     13.95 o 
   1  -2  17      333.50      325.32     25.10 o 
   2  -2  17      116.23      116.97     21.83 o 
   3  -2  17       78.40       89.44     17.26 o 
   4  -2  17        3.30       15.92     10.81 o 
   5  -2  17      585.13      593.55     20.73 o 
   6  -2  17       12.33       19.98     11.33 o 
  -5  -1  17      307.99      323.40     16.99 o 
  -4  -1  17       30.37       32.87     11.14 o 
  -3  -1  17      207.22      216.60     16.30 o 
  -2  -1  17        6.85       48.25     24.32 o 
  -1  -1  17      159.35      153.12     12.49 o 
   0  -1  17       10.01       25.58     13.98 o 
   1  -1  17      139.82      140.05     25.68 o 
   2  -1  17      126.63      130.39     26.94 o 
   3  -1  17       69.77       68.79     10.54 o 
   4  -1  17      560.12      526.65     25.34 o 
   5  -1  17       21.72       11.18     12.96 o 
   6  -1  17        0.10       -1.88     10.04 o 
   7  -1  17       16.77       -1.23     11.83 o 
  -5   0  17       31.38       50.42     12.92 o 
  -4   0  17        8.77       -9.44      9.44 o 
  -3   0  17        0.31       23.81     14.66 o 
  -2   0  17       73.91       74.87     12.89 o 
  -1   0  17        0.15       -0.08      7.74 o 
   0   0  17      163.44      198.46     11.87 o 
   1   0  17      289.91      273.82     17.22 o 
   2   0  17       31.20       19.70      8.07 o 
   3   0  17       32.39       31.58      9.66 o 
   4   0  17       34.49       35.76     10.65 o 
   5   0  17      300.09      281.27     30.69 o 
   6   0  17       18.85        0.19     12.55 o 
   7   0  17      603.58      666.55     61.66 o 
  -5   1  17       18.40       34.30     11.01 o 
  -4   1  17       65.83       71.09     12.15 o 
  -3   1  17      237.01      263.94     19.37 o 
  -2   1  17        6.16        5.90      8.10 o 
  -1   1  17        1.30       -7.32     12.55 o 
   0   1  17      115.66       97.24      9.71 o 
   1   1  17      482.27      553.86     17.01 o 
   2   1  17       57.49       69.16      9.47 o 
   3   1  17      154.04      158.60     12.13 o 
   4   1  17     1082.95      985.41     71.17 o 
   5   1  17       50.85       44.63     16.74 o 
   6   1  17       14.38       25.96     13.40 o 
   7   1  17       99.96      195.86     37.10 o 
  -4   2  17      111.37      116.26     12.52 o 
  -3   2  17       56.79      132.47     24.52 o 
  -2   2  17      448.63      499.78     17.51 o 
  -1   2  17       86.68       71.31     14.66 o 
   0   2  17      254.96      246.23     24.21 o 
   1   2  17      922.55      946.13     72.33 o 
   2   2  17       62.16       80.30     11.14 o 
   3   2  17      251.02      253.18     15.15 o 
   4   2  17        4.50       12.20      8.87 o 
   5   2  17       94.78      152.42     13.40 o 
   6   2  17       42.07       50.59     11.03 o 
   7   2  17      424.36      370.51     40.79 o 
  -4   3  17        3.88        0.96     12.35 o 
  -3   3  17      262.76      241.04     16.44 o 
  -2   3  17      103.36      105.83     11.21 o 
  -1   3  17        3.45       14.54      8.51 o 
   0   3  17       45.72       80.67     21.89 o 
   1   3  17      372.83      415.00     31.99 o 
   2   3  17      100.46       92.61     11.67 o 
   3   3  17        0.14       -8.16     21.72 o 
   4   3  17      993.15     1009.10     23.07 o 
   5   3  17        4.66        1.44     11.42 o 
   6   3  17       17.23        9.87     11.60 o 
   7   3  17      124.26      152.27     25.92 o 
  -3   4  17        9.13       73.63     12.62 o 
  -2   4  17      340.83      369.57     16.20 o 
  -1   4  17       21.22       48.95      9.25 o 
   0   4  17       15.10       36.06     10.41 o 
   1   4  17      222.00      218.98     14.10 o 
   2   4  17       73.87       60.09     11.69 o 
   3   4  17      532.40      564.00     19.13 o 
   4   4  17       56.29       51.25      9.37 o 
   5   4  17       21.19       36.83     12.75 o 
   6   4  17        2.03       -4.59     11.48 o 
   7   4  17      144.53      140.49     16.72 o 
  -3   5  17      380.77      374.53     17.41 o 
  -2   5  17       20.78       27.28      9.39 o 
  -1   5  17        1.56       45.89     10.70 o 
   0   5  17     1068.07      998.97     22.54 o 
   1   5  17        5.38        1.27      6.99 o 
   2   5  17        3.85        6.39      9.55 o 
   3   5  17        0.39       -2.32      9.27 o 
   4   5  17      709.22      704.62     20.89 o 
   5   5  17       17.87       22.42     28.58 o 
   6   5  17      235.94      270.31     15.91 o 
   7   5  17       40.04       40.73     12.27 o 
  -2   6  17      321.86      327.99     17.13 o 
  -1   6  17       36.46       47.62     12.11 o 
   0   6  17      423.74      329.21     25.37 o 
   1   6  17      220.31      210.29     13.02 o 
   2   6  17        0.13       18.29      9.20 o 
   3   6  17      358.81      321.18     16.34 o 
   4   6  17        2.34       -0.38     10.36 o 
   5   6  17      278.99      258.53     14.91 o 
   6   6  17        2.05       30.06     15.52 o 
   7   6  17      268.80      236.94     16.70 o 
  -1   7  17        4.33       44.95     10.58 o 
   0   7  17      466.32      415.39     25.00 o 
   1   7  17      378.95      302.64     16.20 o 
   2   7  17        3.22       12.30      7.62 o 
   3   7  17       36.47       50.37     10.27 o 
   4   7  17      413.88      415.26     17.59 o 
   5   7  17        1.84       -1.38     10.34 o 
   6   7  17        2.77        3.52     11.15 o 
   0   8  17        5.37        9.54      8.56 o 
   1   8  17      140.74      157.52     13.35 o 
   2   8  17       18.56       23.60      9.37 o 
   3   8  17       93.99       95.19     11.86 o 
   4   8  17        8.65       19.20      9.37 o 
   5   8  17       12.43       29.17     10.57 o 
  -2  -6  18       54.82       73.44     12.04 o 
  -1  -6  18       76.13       39.27     12.54 o 
   0  -6  18      114.49       93.02     11.60 o 
   1  -6  18       51.56       39.57     11.34 o 
   2  -6  18       12.27       16.89     15.04 o 
  -3  -5  18      250.00      215.57     15.44 o 
  -2  -5  18        0.49       16.88      9.94 o 
  -1  -5  18       38.63       68.91     12.48 o 
   0  -5  18      114.53       89.64     14.15 o 
   1  -5  18        0.46        6.06     10.41 o 
   2  -5  18       96.71      117.41     13.54 o 
   3  -5  18       11.65       42.21     21.18 o 
  -3  -4  18       64.56       32.04     11.83 o 
  -2  -4  18        0.43       13.14      9.53 o 
  -1  -4  18      418.08      451.26     18.52 o 
   0  -4  18       25.76       26.37      9.52 o 
   1  -4  18        4.71        1.52     11.05 o 
   2  -4  18       30.64       22.80     10.22 o 
   3  -4  18      355.03      376.27     17.24 o 
   4  -4  18       79.79      100.03     12.33 o 
  -4  -3  18       36.99       37.15     11.48 o 
  -3  -3  18      135.20      156.84     13.09 o 
  -2  -3  18       14.85       -5.72      9.42 o 
  -1  -3  18      119.90      116.59     26.91 o 
   0  -3  18      382.11      408.61     17.14 o 
   1  -3  18        6.03        3.56      8.16 o 
   2  -3  18      281.98      319.08     16.25 o 
   3  -3  18       29.03       31.57     10.95 o 
   4  -3  18      308.41      294.48     32.81 o 
   5  -3  18        0.60       22.20     12.50 o 
  -4  -2  18      178.04      211.36     47.30 o 
  -3  -2  18      189.50      178.77     13.45 o 
  -2  -2  18        0.43       14.46      8.98 o 
  -1  -2  18      411.44      423.00     20.94 o 
   0  -2  18       29.04       39.73      8.29 o
[truncated: 181,423 more chars]
